# Supplementary material for: Facile synthesis and stereo-resolution of chiral 1,2,3-triazoles
Source: Royal Society of Chemistry journal article supplement (doi:10.1039/c5ob00479a), 2015-01-01

# Supporting Information

## Facile Synthesis and Stereo-Resolution of Chiral 1,2,3-Triazole

*Ye Shi,<sup>a</sup> Xiaohan Ye,<sup>b</sup> Qiang Gu,<sup>a</sup> Xiaodong Shi<sup>\*b</sup> and Zhiguang Song<sup>\*a</sup>*

<sup>a</sup> *Department of Organic Chemistry, College of Chemistry, Jilin University, No. 2519 Jiefang Road, Changchun 130021, P. R. China.*

<sup>b</sup> *C. Eugene Bennett Department of Chemistry, West Virginia University, Morgantown, WV 26506, USA.*

|                                  |     |
|----------------------------------|-----|
| I. General Methods and Materials | S1  |
| II. Optimal Condition            | S5  |
| II. Compounds Characterization   | S8  |
| IV. HPLC profiles                | S13 |
| V. NMR Spectra Data              | S22 |

## I. General Methods and Materials

### General Information

All of the reactions dealing with air and/or moisture-sensitive reactions were carried out under an atmosphere of nitrogen using oven/flame-dried glassware and standard syringe/septum techniques. Unless otherwise noted, all commercial reagents and solvents were obtained from the commercial provider and used without further purification.  $^1\text{H}$ -NMR and  $^{13}\text{C}$ -NMR spectra were recorded on Varian 400 MHz spectrometers and Bruker 400 MHz spectrometers. Chemical shifts were reported relative to internal tetramethylsilane ( $\delta$  0.00 ppm) or  $\text{CDCl}_3$  ( $\delta$  7.26 ppm),  $\text{CD}_3\text{CD}$  ( $\delta$  3.31 ppm) for  $^1\text{H}$  and  $\text{CDCl}_3$  ( $\delta$  77.0 ppm),  $\text{CD}_3\text{CD}$  ( $\delta$  49.75 ppm) for  $^{13}\text{C}$ . Flash column chromatography was performed on 300-400 mesh silica gels. Analytical thin layer chromatography was performed with precoated glass baked plates (250 $\mu$ ) and visualized by fluorescence and by charring after treatment with potassium permanganate stain. Optical rotations were measured on a commercial automatic polarimeter (WZZ-1S digital, Shanghai Physical Optics Instrument Factory ) and reported as follows:  $[\alpha]^T_D$  ( $c = \text{g}/100 \text{ mL}$ , solvent). Melting points were measured on a X-4 digital microscopy apparatus and uncorrected. HRMS were recorded on LTQ-FTUHRA spectrometer and Bruker ApexII mass spectrometer. Anhydrous Toluene was purchased from Beijing Chemical Reagent Co. and distilled with sodium, immediately before use.

### General procedure for the preparation of 5a/5b

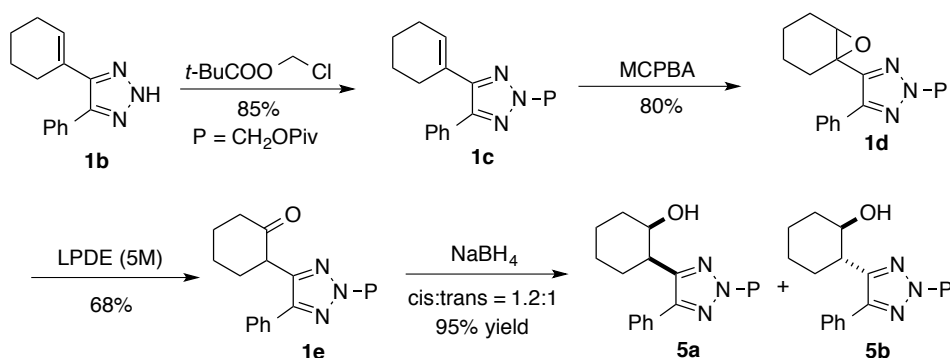

**4-(cyclohex-1-en-1-yl)-5-phenyl-2H-1,2,3-triazole (1b)** was synthesized according the following literature:

Sengupta, S.; Duan, H.; Lu, W.; Petersen, J. L.; Shi, X. *Org. Lett.* **2008**, *10*, 1493

**4-(cyclohex-1-en-1-yl)-5-phenyl-2H-1,2,3-triazol-2-ylmethyl pivalate (1c).** To the solution of compound 1b (30.0g, 0.13mol) in acetone (60 mL), chloromethylene pivalate (23.4g, 0.26mol) and  $\text{K}_2\text{CO}_3$  (35.9g, 0.26mol) were added. The mixture was stirring at RT for 12h. The white solid was removed by filtrating. After removing the solvent under vacuum, the resulting crude product was purified by column chromatography on silica gel (petroleum ether: EtOAc= 10:1).

**(4-(7-oxabicyclo[4.1.0]heptan-1-yl)-5-phenyl-2H-1,2,3-triazol-2-yl)methyl pivalate (1d).** Compound **1c** (35.0g, 0.11mol) was dissolved in 50ml dry DCM at 0 °C in ice-bath under N<sub>2</sub> atmosphere. And then the solution of m-CPBA(26.9g, 0.17mol) in 20 ml dry DCM was added dropwise over 10 mins. The reaction mixture was stirred for 3 hours at RT and monitored by TLC. After the completing of starting material, the reaction mixture was filtrated to remove the white solid. The filtrate was then washed with 10% Na<sub>2</sub>CO<sub>3</sub> solution and brine. The organic phase was dried with MgSO<sub>4</sub> and concentrated under vacuum. The crude product was purified by column chromatography on silica gel (petroleum ether: EtOAc= 8:1).

**(4-(2-oxocyclohexyl)-5-phenyl-2H-1,2,3-triazol-2-yl)methyl pivalate (1e).** The compound **1d** (30.0g, 0.085mol) was added to an ice-cold 5 M LPDE solution (17 mL) under N<sub>2</sub> atmosphere and monitored by TLC. The mixture was quenched by 50 mL H<sub>2</sub>O, and then extracted by 50 mL CH<sub>2</sub>Cl<sub>2</sub> three times. The combined organic phase was washed by 50 mL brine twice, dried by MgSO<sub>4</sub>. Solvent was removed under vacuum. The crude product was purified by column chromatography on silica gel (petroleum ether:EtOAc= 5:1)

**4-(2-hydroxycyclohexyl)-5-phenyl-2H-1,2,3-triazol-2-yl)methyl pivalate (5a/5b)** To the solution of compound **1e** (2.0g, 5.6mmol) into 20 mL MeOH at 0 °C, NaBH<sub>4</sub> (0.43g, 11.2mmol) was added. After stirring at 0 °C for 3h, the mixture was quenched by 50 mL H<sub>2</sub>O, extracted by 50 mL EtOAc three times. The combined organic layer was washed by 100 mL brine twice, dried by MgSO<sub>4</sub>. Solvent was removed under vacuum. The crude product was purified by column chromatography on silica gel (petroleum ether: EtOAc= 5:1).

## General Procedure for kinetic resolution of **5a** and **5b** with CalB.

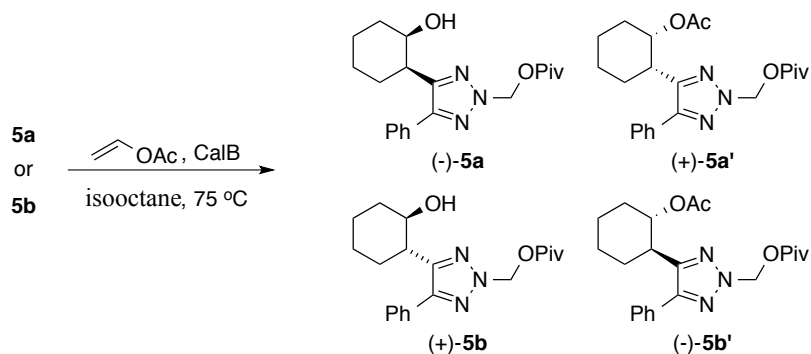

To the solution of racemic alcohols **5a** or **5b** (1.07g, 3.0 mmol) in 30 mL of isooctane (HPLC grade), vinyl acetate (688 mg, 8.0 mmol) and lipase B (480 mg) were added. The mixture was then stirred in an orbital shaker (75 °C, 160 rpm) at 24-72h. The mixture was then filtered and the solvent evaporated. The residue was purified by silica gel column chromatography gel (Hexane: EtOAc=4:1) to give desired enantiopure alcohols. The stereochemistry assignment is based on rules for *Pseudomonas cepacia* lipases and *Candida rugosa* lipases (R. J. Kazlauskas, A. N. E. Weissfloch, A.T. Rappaport and L.A. Cuccia, *J. Org. Chem.*, 1991, **56**, 2656-2665) thus, the stereochemical assignments are only tentative at this time. The crystal growing for the derivatives is undergoing in our lab, which will help for the conformation of stereochemical assignment

## Asymmetric additions of diethylzinc to aldehydes with Chiral $\beta$ -hydroxyl TA ligand (**5a'**):

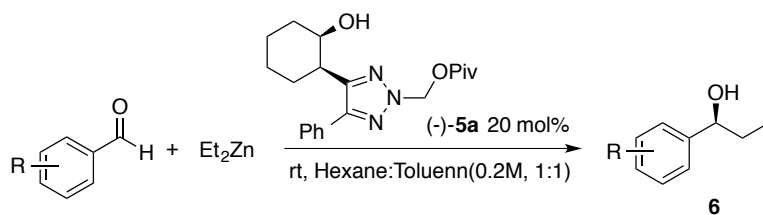

To a solution of Chiral  $\beta$ -hydroxyl TA ligand **5a'** (0.2 mmol) in toluene (1.0 ml) at 0 °C, 2.0 ml (1.0M, 2 mmol) diethylzinc in hexane was added. After stirring for 30 min, aldehyde (1 mmol in 1 mL toluene) was added slowly. The mixture was then stirred for 48 h at room temperature. The reaction was quenched with saturated ammoniumchloride solution (10 ml), and extracted with diethyl ether (20ml) twice. The combined organic extracts were washed with 30 mL brine twice, and dried by MgSO<sub>4</sub>. Evaporate the solvent under vacuum. The residue was purified by chromatography on silica gel (Hexane: EtOAc= 5:1) to give the desired product (**6a-6e**).

## II. Screening table for kinetic resolution of **5a** and **5b** with CalB.

To the solution of racemic alcohols **5a** or **5b** (89.2, 0.25 mmol) in 2 mL of isooctane (HPLC grade), vinyl acetate (57.3mg, 0.67 mmol) and lipase B (40 mg) were added. The mixture was then stirred in an orbital shaker (75 °C, 160 rpm) at 24-72h. The mixture was then filtered and the solvent evaporated. The mixture was used directly for HPLC analysis.

The conversion was calculated by:

$$c = \frac{ees}{ees+eep} \text{ where S for the substrate and P for the product.}$$

The enantioselectivity, S was calculated by

$$S = \frac{\ln [(1-c)(1-ees)]}{\ln [(1-c)(1+ees)]} = \frac{\ln [1-c(1+eep)]}{\ln [1-c(1-eep)]}$$

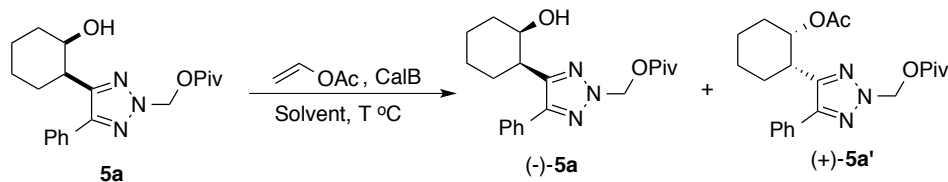

| Entry           | Solvent          | T(°C) | Reaction time (h) | Conv.(%) | (-)- <b>5a</b><br><i>ee</i> | (+)- <b>5a'</b><br><i>ee</i> | S    |
|-----------------|------------------|-------|-------------------|----------|-----------------------------|------------------------------|------|
| 1               | H <sub>2</sub> O | 40 °C | 24h               | 0        | 0                           | 0                            | --   |
| 2               | THF              | 40 °C | 24h               | 0        | 0                           | 0                            | --   |
| 3               | acetone          | 40 °C | 24h               | 0        | 0                           | 0                            | --   |
| 4               | 1,4-dioxane      | 40 °C | 24h               | 0        | 0                           | 0                            | --   |
| 5               | isooctane        | 40 °C | 24h               | <10      | <10                         | >99                          | <10  |
| 6               | isooctane        | 75 °C | 24h               | 35       | 55                          | 99                           | 163  |
| 7               | isooctane        | 75 °C | 72h               | 50       | 99                          | 99                           | >200 |
| 8 <sup>a</sup>  | isooctane        | 75 °C | 72h               | 50       | 99                          | 99                           | >200 |
| 9 <sup>b</sup>  | isooctane        | 75 °C | 72h               | 49       | 95                          | 99                           | >200 |
| 10 <sup>c</sup> | isooctane        | 75 °C | 72h               | 47       | 89                          | 99                           | >200 |

<sup>a</sup> reuse for the first time <sup>b</sup> reused for the second times <sup>c</sup> reused for the three times

## HPLC profile for entry 7

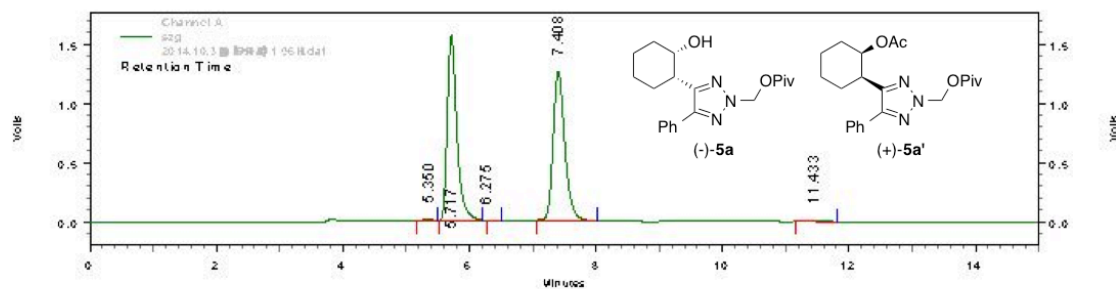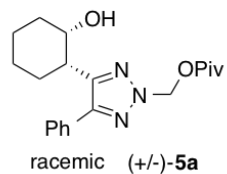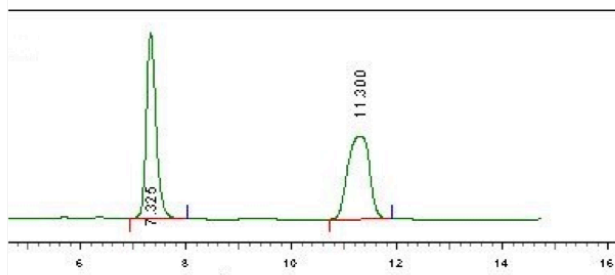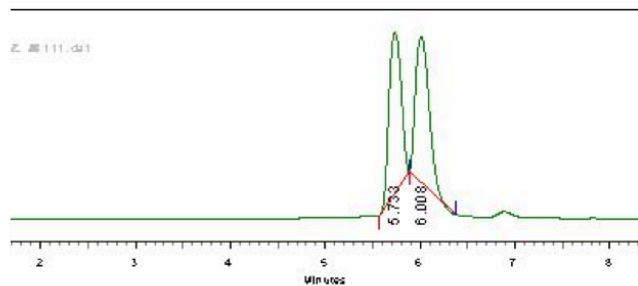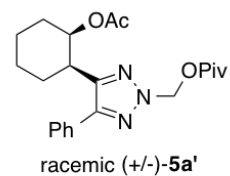

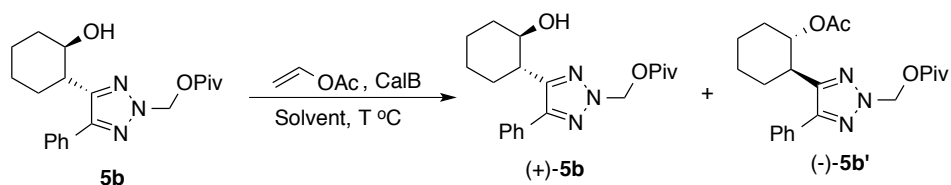

| Entry          | Solvent          | T(°C) | Reaction time (h) | Conv.(%) | (+)-5b ee | (-)-5b' ee | S    |
|----------------|------------------|-------|-------------------|----------|-----------|------------|------|
| 1              | H <sub>2</sub> O | 40 °C | 24h               | 0        | 0         | 0          | --   |
| 2              | THF              | 40 °C | 24h               | 0        | 0         | 0          | --   |
| 3              | acetone          | 40 °C | 24h               | <10      | <10       | >99        | <10  |
| 4              | 1,4-dioxane      | 40 °C | 24h               | <10      | <10       | >99        | <10  |
| 5              | isooctane        | 40 °C | 24h               | 49       | 98        | 95         | 152  |
| 6              | isooctane        | 75 °C | 24h               | 50       | >99       | 99         | >200 |
| 7 <sup>a</sup> | isooctane        | 75 °C | 24h               | 50       | 99        | 98         | >200 |
| 8 <sup>b</sup> | isooctane        | 75 °C | 24h               | 50       | 99        | 98         | >200 |
| 9 <sup>c</sup> | isooctane        | 75 °C | 24h               | 50       | 98        | 97         | >200 |

<sup>a</sup>reuse for the first time <sup>b</sup>reused for the second times <sup>c</sup>reused for the three times

### HPLC profile for entry 6

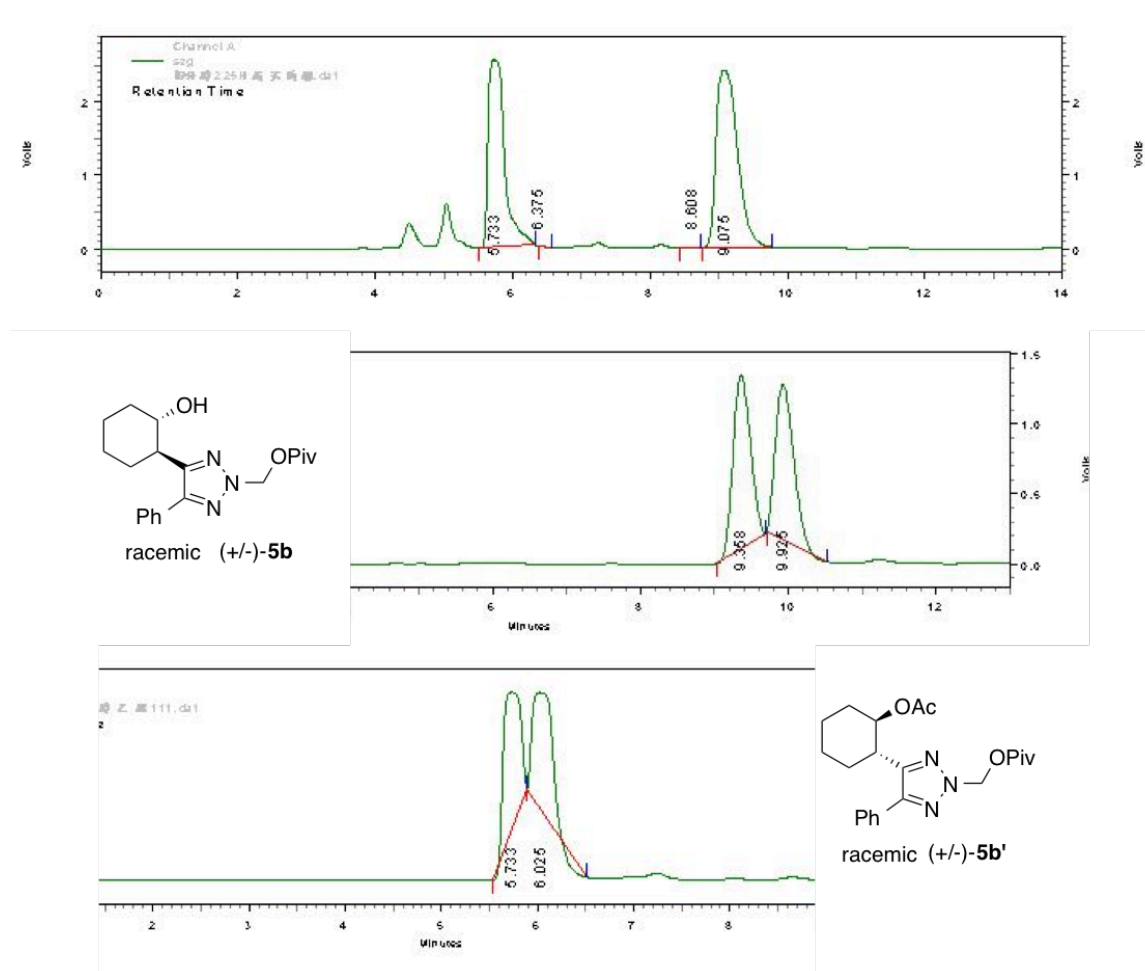

### III. Compounds Characterization

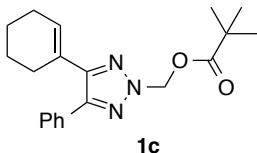

#### 4-(cyclohex-1-en-1-yl)-5-phenyl-2H-1,2,3-triazol-2-yl)methyl pivalate (1c)

The product was obtained as white solid 35.3g (85% yield). m.p. 76-78 °C. <sup>1</sup>H NMR (400 MHz, CDCl<sub>3</sub>): δ 7.68-7.70 (d, J=7.2Hz, 2H), 7.36-7.48(m,3H), 6.26(s, 2H), 6.08(m, 1H), 2.32-2.38(m, 2H), 2.12-2.18(m, 2H), 1.66-1.80(m, 4H), 1.24(s,9H); <sup>13</sup>C NMR(100 MHz, CDCl<sub>3</sub>): δ 177.0, 148.3, 145.7, 131.2, 130.2, 128.5, 128.5, 128.3, 128.2, 74.6, 38.9, 27.5, 27.0, 25.5, 22.6, 21.8. LC-MS(ESI) Calculated for [C<sub>20</sub>H<sub>25</sub>N<sub>3</sub>O<sub>2</sub>H]<sup>+</sup>: 340.1947, Found: 340.1912.

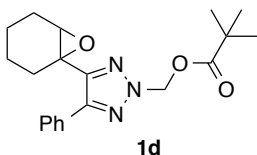

#### (4-(7-oxabicyclo[4.1.0]heptan-1-yl)-5-phenyl-2H-1,2,3-triazol-2-yl)methyl pivalate (1d).

The product was obtained as white solid 31.2g (80% yield). m.p. 40-42°C. <sup>1</sup>H NMR (400 MHz, CDCl<sub>3</sub>): δ 7.80-7.84 (d, J=7.2Hz, 2H), 7.39-7.49 (m, 3H), 6.23 (s, 2H), 3.48-3.51(m, 1H), 2.20-2.30(m, 1H), 1.91-2.20(m, 3H), 1.50-1.51(m, 2H), 1.30-1.42(m, 2H), 1.21(s, 9H); <sup>13</sup>C NMR(100 MHz, CDCl<sub>3</sub>): δ 177.0, 147.1, 130.1, 128.9, 127.6, 128.1, 74.4, 65.9, 58.4, 55.2, 38.9, 28.4, 24.2, 19.6, 19.1, 15.2. LC-MS(ESI) Calculated for [C<sub>20</sub>H<sub>25</sub>N<sub>3</sub>O<sub>3</sub>H]<sup>+</sup>: 356.1896, Found: 356.1816.

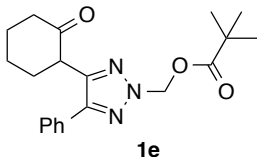

#### 4-(2-oxocyclohexyl)-5-phenyl-2H-1,2,3-triazol-2-yl)methyl pivalate (1e).

The product was obtained as light white solid 18.6 g, with 68% yield. m. p. 83-85 °C. <sup>1</sup>H NMR (400 MHz, CDCl<sub>3</sub>), δ 7.39-7.54 (m, 5H), 6.28 (s, 1H), 3.90 (t, J=8.5, 1H ), 3.90 (t, J=8.5, 1H ), 1.68-2.7 (m, 8H), 1.21 (s, 9H); <sup>13</sup>C NMR (100 MHz, CDCl<sub>3</sub>) δ 208.57, 177.013, 148.11, 144.71, 130.39, 128.72, 128.67, 128.06, 74.46, 48.68, 41.86, 38.91, 32.76, 27.34, 24.67. LC-MS(ESI): calculated for C<sub>20</sub>H<sub>27</sub>N<sub>3</sub>O<sub>3</sub> [C<sub>20</sub>H<sub>25</sub>N<sub>3</sub>O<sub>3</sub>H]<sup>+</sup>: 356.1896, Found: 356.1812.

#### 4-(2-hydroxycyclohexyl)-5-phenyl-2H-1,2,3-triazol-2-yl)methyl pivalate (5a/5b)



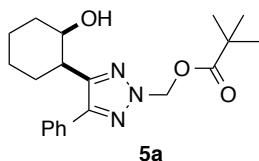

*cis*-**5a** was obtained as light yellow oil 1.0 g, with 52% yield. <sup>1</sup>H NMR (400 MHz, CDCl<sub>3</sub>) δ 7.4-7.65 (m, 5H), 6.28 (s, 1H), 4.17 (m, 1H), 3.10 (m, 1H), 1.25-2.1 (m, 8H), 1.23 (s, 9H); <sup>13</sup>C NMR (100 MHz, CDCl<sub>3</sub>) δ 176.92, 150.14, 146.89, 130.33, 128.86, 128.71, 128.08, 74.23, 67.91, 39.16, 38.92, 32.16, 26.91, 26.89, 25.88, 19.50. LC-MS(ESI): calculated for [C<sub>20</sub>H<sub>27</sub>N<sub>3</sub>O<sub>3</sub>H]<sup>+</sup>: 358.2052, Found: 358.2119.

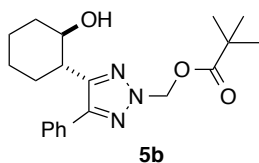

*trans*-**5b** was obtained as light yellow oil 0.83 g, with 43% yield. <sup>1</sup>H NMR (400 MHz, CDCl<sub>3</sub>) δ 7.4-7.65 (m, 5H), 6.28 (s, 1H), 4.15 (m, 1H), 2.98 (m, 1H), 1.25-2.1 (m, 8H), 1.23 (s, 9H); <sup>13</sup>C NMR (100 MHz, CDCl<sub>3</sub>) δ 177.02, 149.19, 147.85, 130.56, 128.73, 128.58, 128.02, 74.39, 73.44, 43.57, 38.91, 34.41, 31.86, 26.92, 25.66, 24.84. LC-MS(ESI): calculated for [C<sub>20</sub>H<sub>27</sub>N<sub>3</sub>O<sub>3</sub>H]<sup>+</sup>: 358.2052, Found: 358.2119.

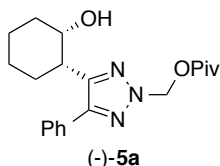

*cis*-(-)-**5a** was obtained as colorless liquid. <sup>1</sup>H NMR (400 MHz, CDCl<sub>3</sub>) δ: (ppm) 7.4-7.65 (m, 5H), 6.28 (s, 2H), 4.17 (m, 1H), 3.10 (m, 1H), 1.25-2.1 (m, 8H), 1.23 (s, 9H); <sup>13</sup>C NMR (100 MHz, CDCl<sub>3</sub>) δ: 176.92, 150.14, 146.89, 130.33, 128.86, 128.71, 128.08, 74.23, 67.91, 39.16, 38.92, 32.16, 26.91, 26.89, 25.88, 19.50. LC-MS(ESI): calculated for [C<sub>20</sub>H<sub>27</sub>N<sub>3</sub>O<sub>3</sub>H]<sup>+</sup>: 358.2052, Found: 358.2119. Enantiomeric excess was determined by HPLC analysis with a Chiralcel OD-H column (hexane: 2-propanol = 97:3, 1.0 mL/min, 254 nm UV detector), t<sub>minor</sub> = 11.93 min and t<sub>major</sub> = 7.59 min. 99% *ee*. [α]<sub>D</sub><sup>20</sup> = -33.9 (*c*=1.0, CHCl<sub>3</sub>).

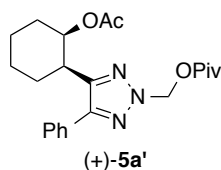

*cis*-(+)-**5a'** was obtained as yellow liquid. <sup>1</sup>H NMR (400 MHz, CDCl<sub>3</sub>): δ 7.57 (dt, *J* = 8.1, 1.8 Hz, 2H), 7.47-7.37 (m, 3H), 6.24 (s, 2H), 5.21 (dd, *J* = 4.8, 2.4 Hz, 1H), 3.24 (dt, *J* = 10.8, 3.4 Hz, 1H), 2.17-2.10 (m, 1H), 2.06 (s, 3H), 2.00-1.88 (m, 5H), 1.79-1.53 (m, 5H), 1.44-1.36 (m, 2H), 1.22-1.18 (m, 9H). <sup>13</sup>C NMR (100 MHz, CDCl<sub>3</sub>): δ 176.7, 170.9, 170.1, 147.8, 147.2, 130.6, 128.58, 128.41, 128.1, 74.2, 70.5, 60.2, 38.7, 37.1, 29.7, 26.8, 26.5, 24.6, 20.98, 20.87, 20.7, 14.1. HRMS for [C<sub>22</sub>H<sub>30</sub>N<sub>3</sub>O<sub>4</sub>]<sup>+</sup>: 400.2231, Found: 400.2233.

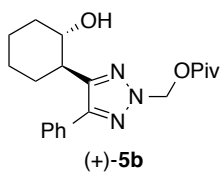

trans-(+)-**5b** was obtained as colorless liquid.;  $^1\text{H}$  NMR (400 MHz,  $\text{CDCl}_3$ )  $\delta$ : (ppm) 7.4-7.65 (m, 5H), 6.28 (s, 2H), 4.15(m, 1H), 2.98 (m, 1H), 1.25-2.1 (m, 8H), 1.23 (s, 9H);  $^{13}\text{C}$  NMR (100 MHz,  $\text{CDCl}_3$ )  $\delta$ : (ppm) 177.02, 149.19, 147.85, 130.56, 128.73, 128.58, 128.02, 74.39, 73.44, 43.57, 38.91, 34.41, 31.86, 26.92, 25.66, 24.84. LC-MS(ESI): calculated for  $[\text{C}_{20}\text{H}_{27}\text{N}_3\text{O}_3\text{H}]^+$  :358.2052, Found:358.2119. Enantiomeric excess was determined by HPLC analysis with a Chiralcel OD-H column (hexane: 2-propanol = 97:3, 1.0 mL/min, 254 nm UV detector),  $t_{\text{minor}} = 9.41$  min and  $t_{\text{major}} = 9.88$  min. 99% *ee*.  $[\alpha]_{\text{D}}^{20} = +32.3$  (*c* 1.0,  $\text{CHCl}_3$ ).

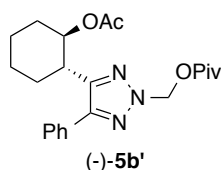

trans-(-)-**5b'** was obtained as yellow liquid  $^1\text{H}$  NMR (400 MHz,  $\text{CDCl}_3$ ):  $\delta$  7.72-7.69 (m, 2H), 7.49-7.39 (m, 3H), 6.24 (d,  $J = 0.2$  Hz, 2H), 5.29 (s, 2H), 5.08 (td,  $J = 10.6, 4.3$  Hz, 1H), 3.12 (ddd,  $J = 11.9, 10.5, 3.9$  Hz, 1H), 2.21-2.17 (m, 1H), 2.03 (d,  $J = 3.5$  Hz, 1H), 1.99-1.94 (m, 1H), 1.86-1.74 (m, 5H), 1.53-1.25 (m, 5H), 1.24-1.19 (m, 8H).  $^{13}\text{C}$  NMR (101 MHz;  $\text{cdcl}_3$ ):  $\delta$  176.7, 170.9, 169.6, 161.5, 148.3, 147.4, 130.6, 128.59, 128.55, 128.51, 128.36, 128.23, 128.20, 128.05, 127.99, 76.4, 74.2, 60.2, 53.3, 39.7, 38.7, 32.0, 31.8, 26.7, 25.2, 24.2, 20.8, 14.1. HRMS for  $[\text{C}_{22}\text{H}_{30}\text{N}_3\text{O}_4]^+$ : 400.2231, Found: 400.2233.

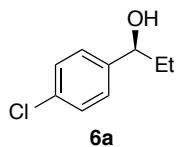

#### (S)-1-(4-Chlorophenyl)-1-propanol

**6a** was obtained as light yellow oil. 90% yield.  $^1\text{H}$  NMR (400 MHz,  $\text{CDCl}_3$ ):  $\delta$  7.29 (d,  $J = 8.4$  Hz, 2H), 7.24(d,  $J = 8.4$  Hz, 2H), 4.57 (t,  $J = 6.8$  Hz, 1H), 2.12 (s, 1H), 1.82–1.66 (m, 2H), 0.90 (t,  $J = 7.2$  Hz, 3H).  $^{13}\text{C}$  NMR (100 MHz,  $\text{CDCl}_3$ ):  $\delta$  143.0, 133.0, 128.4, 127.3, 75.2, 31.9, 9.9. Enantiomeric excess was determined by HPLC analysis with a Chiralcel OD-H column (hexane: 2-propanol = 97:3, 1.0 mL/min, 254 nm UV detector),  $t_{\text{S}} = 27.10$  min for (S) and  $t_{\text{R}} = 31.10$  min for (R), 99% *ee* (S).

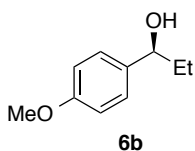

#### (S)-1-(4-Methoxyphenyl)-1-propanol (6b)

**6b** was obtained as light yellow oil. 90% yield.  $^1\text{H}$  NMR (400 MHz,  $\text{CDCl}_3$ ):  $\delta$  7.36–7.25 (m, 2H), 6.90–6.86 (m, 2H), 4.54 (t,  $J$  = 6.7 Hz, 1H), 3.80 (s, 3H), 1.84–1.69 (m, 3H), 0.89 (t,  $J$  = 7.2 Hz, 3H).  $^{13}\text{C}$  NMR (100 MHz,  $\text{CDCl}_3$ ):  $\delta$  158.8, 136.9, 127.2, 113.7, 75.4, 55.2, 31.7, 10.1. Enantiomeric excess was determined by HPLC analysis with a Daicel Chiralcel OD-H column, (hexane: 2-propanol = 97:3, 1.0 mL/min, 254 nm UV detector),  $t_{\text{S}}$  = 18.38 min for (*S*) and  $t_{\text{R}}$  = 15.79 min for (*R*), 60% *ee* (*S*)

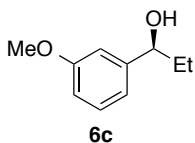

**(*S*)-1-(3-Methoxyphenyl)-1-propanol (6c)**

**6c** was obtained as yellow oil. 87% yield.  $^1\text{H}$  NMR (400 MHz,  $\text{CDCl}_3$ ):  $\delta$  7.26 (t,  $J$  = 8.0 Hz, 2H), 6.91 (d,  $J$  = 6.8 Hz, 2H), 6.83–6.80 (m, 1H), 4.57 (t,  $J$  = 6.5 Hz, 1H), 3.81 (s, 3H), 1.85–1.71 (m, 2H), 0.92 (t,  $J$  = 7.4 Hz, 3H).  $^{13}\text{C}$  NMR (100 MHz,  $\text{CDCl}_3$ ):  $\delta$  159.7, 146.3, 129.4, 118.3, 112.9, 111.4, 75.9, 55.2, 31.8, 10.1. Enantiomeric excess was determined by HPLC analysis with a Daicel Chiralcel OD-H column, (hexane: 2-propanol = 97:3, 1.0 mL/min, 254 nm UV detector),  $t_{\text{S}}$  = 23.21 min for (*S*) and  $t_{\text{R}}$  = 21.95 min for (*R*), 60% *ee* (*S*)

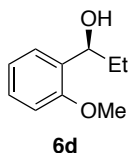

**(*S*)-1-(2-Methoxyphenyl)-1-propanol (6d)**

**6d** was obtained as yellow oil. 75% yield.  $^1\text{H}$  NMR (400 MHz,  $\text{CDCl}_3$ ):  $\delta$  7.30–7.23 (m, 1H), 6.95–6.86 (m, 3H), 4.60 (t,  $J$  = 6.4 Hz, 1H), 3.84 (s, 3H), 1.77–1.86 (m and s overlap, 3H), 0.95 (t,  $J$  = 7.2 Hz, 3H).  $^{13}\text{C}$  NMR (100 MHz,  $\text{CDCl}_3$ ):  $\delta$  159.7, 146.3, 129.4, 118.3, 112.9, 111.5, 75.9, 55.3, 31.9, 10.1. Enantiomeric excess was determined by HPLC analysis with a Daicel Chiralcel OD-H column (hexane: ethanol = 97:3, 0.5 mL/min, 254 nm UV detector),  $t_{\text{S}}$  = 16.55 min for (*S*) and  $t_{\text{R}}$  = 18.41 min for (*R*). 90% *ee* (*S*)

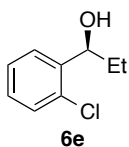

**(*S*)-1-(2-Chlorophenyl)-1-propanol (6e)**

**6e** was obtained as yellow oil. 90% yield.  $^1\text{H}$  NMR (400 MHz,  $\text{CDCl}_3$ ):  $\delta$  7.55 (dd,  $J$  = 1.6 Hz,  $J$  = 7.6 Hz, 1H), 7.36–7.25 (m, 2H), 7.25–7.16 (m, 1H), 5.10–5.05 (dd,  $J$  = 4.8 Hz,  $J$  = 7.6 Hz, 1H), 2.14 (s, 1H), 1.90–1.71 (m, 2H), 1.01 (t,  $J$  = 7.2 Hz, 3H).  $^{13}\text{C}$  NMR (100 MHz,  $\text{CDCl}_3$ ):  $\delta$  141.9, 131.9, 129.3, 128.3, 127.1, 127.0, 71.9, 30.4, 10.1. Enantiomeric excess was determined by HPLC analysis with a Daicel Chiralcel OD-H column (hexane:

2-propanol = 97:3, 1.0 mL/min, 254 nm UV detector),  $t_S$  = 8.68 min for (*S*) and  $t_R$  = 10.19 min for (*R*). 60% *ee* (*S*)

## HPLC Profile

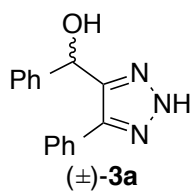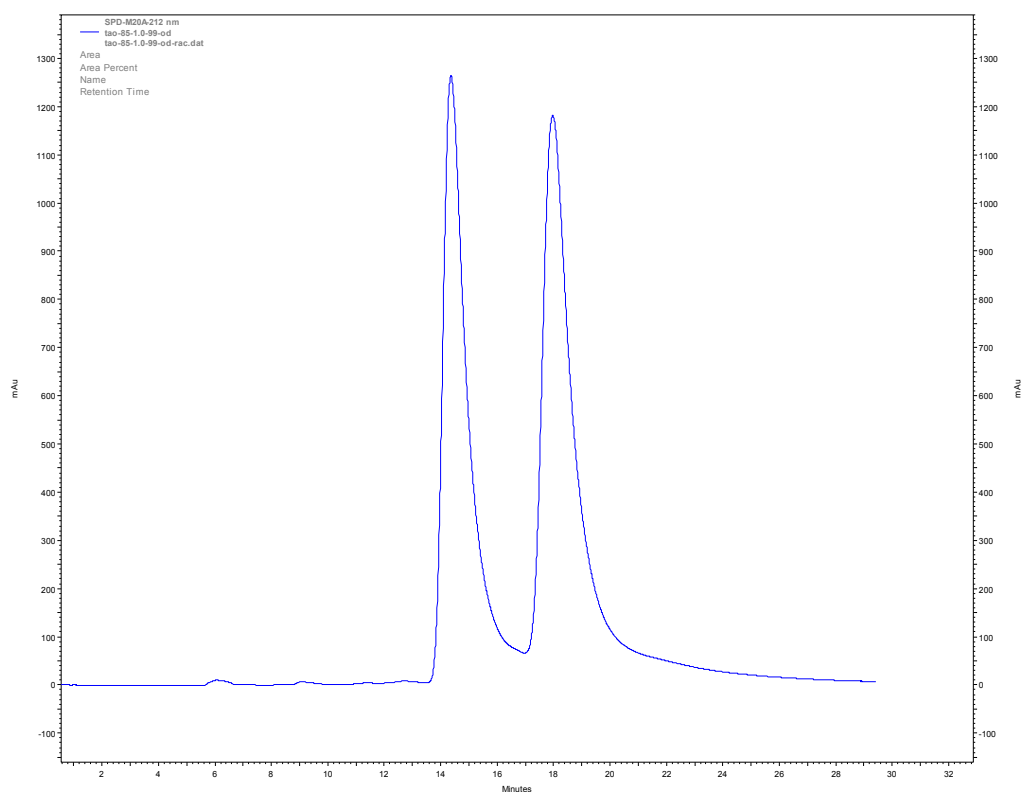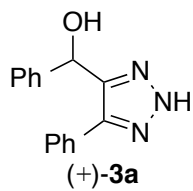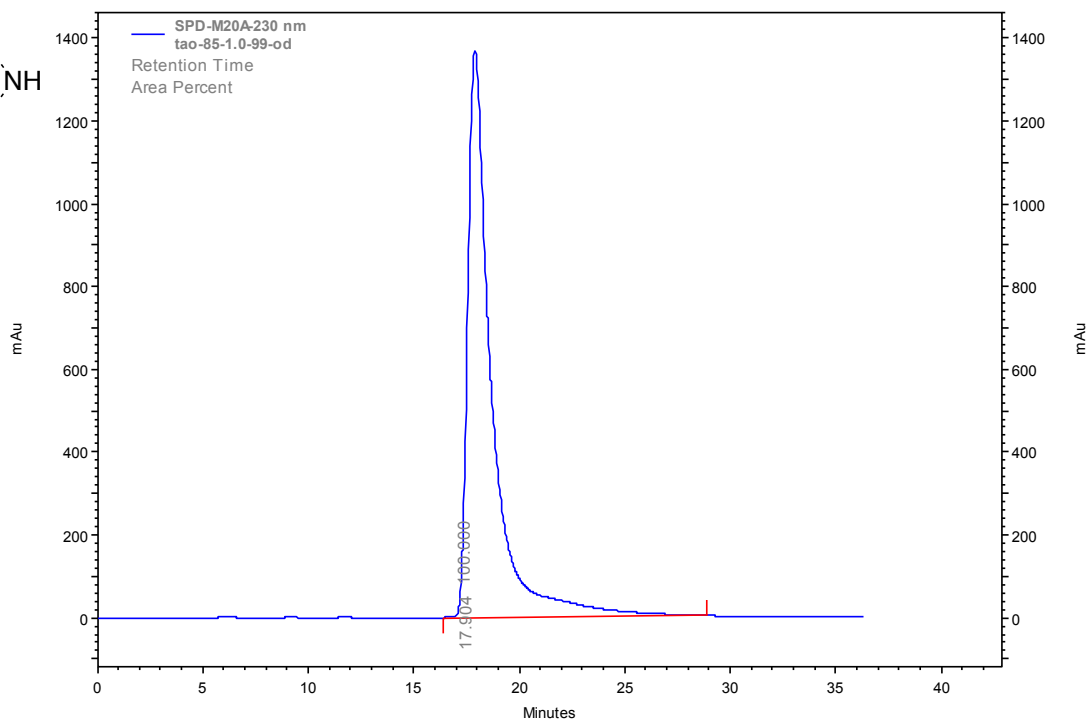

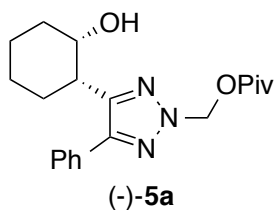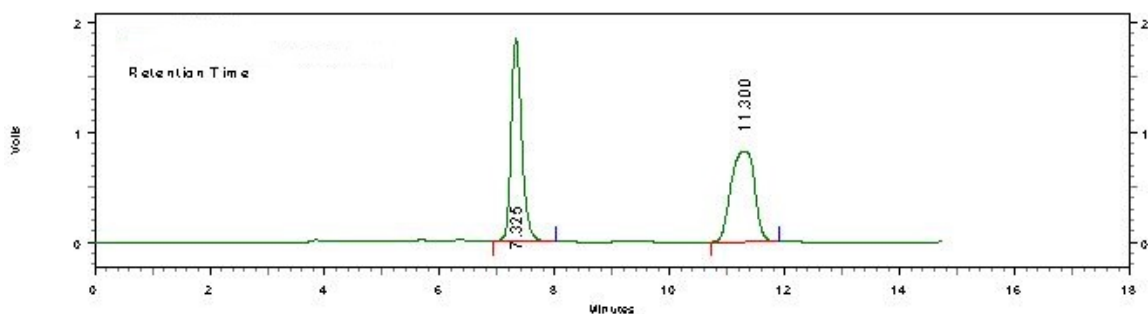

**Detector A (254nm)**

| PK # | Retention Time | Area     | Area % | Height  | Height % |
|------|----------------|----------|--------|---------|----------|
| 1    | 7.325          | 23877036 | 50.380 | 1848436 | 69.140   |
| 2    | 11.300         | 23516578 | 49.620 | 825032  | 30.860   |

|        |  |          |         |         |         |
|--------|--|----------|---------|---------|---------|
| Totals |  | 47393614 | 100.000 | 2673468 | 100.000 |
|--------|--|----------|---------|---------|---------|

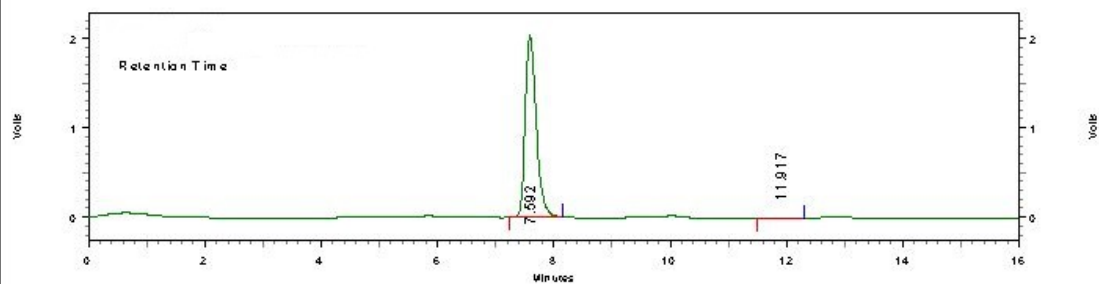

**Detector A (254nm)**

| PK # | Retention Time | Area     | Area % | Height  | Height % |
|------|----------------|----------|--------|---------|----------|
| 1    | 7.592          | 26617232 | 99.966 | 2028837 | 99.975   |
| 2    | 11.917         | 9069     | 0.034  | 500     | 0.025    |

|        |  |          |         |         |         |
|--------|--|----------|---------|---------|---------|
| Totals |  | 26626301 | 100.000 | 2029337 | 100.000 |
|--------|--|----------|---------|---------|---------|

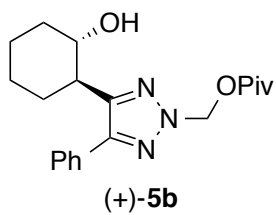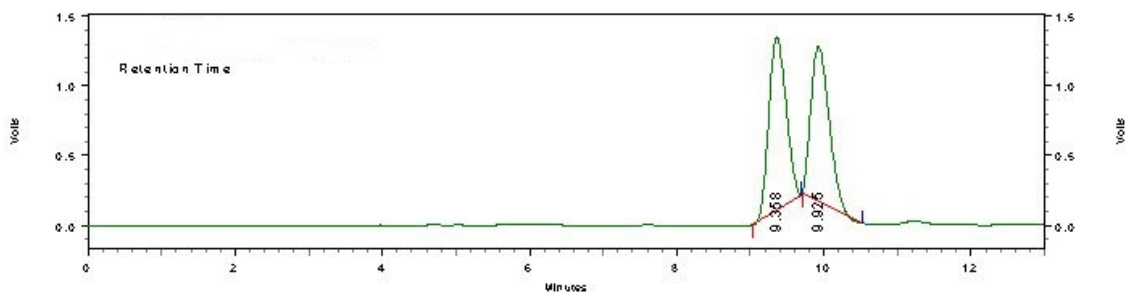

Detector A (254nm)

| PK # | Retention Time | Area     | Area % | Height  | Height % |
|------|----------------|----------|--------|---------|----------|
| 1    | 9.358          | 20207348 | 51.421 | 1237867 | 52.647   |
| 2    | 9.925          | 19090738 | 48.579 | 1113413 | 47.353   |

|        |  |          |         |         |         |
|--------|--|----------|---------|---------|---------|
| Totals |  | 39298086 | 100.000 | 2351280 | 100.000 |
|--------|--|----------|---------|---------|---------|

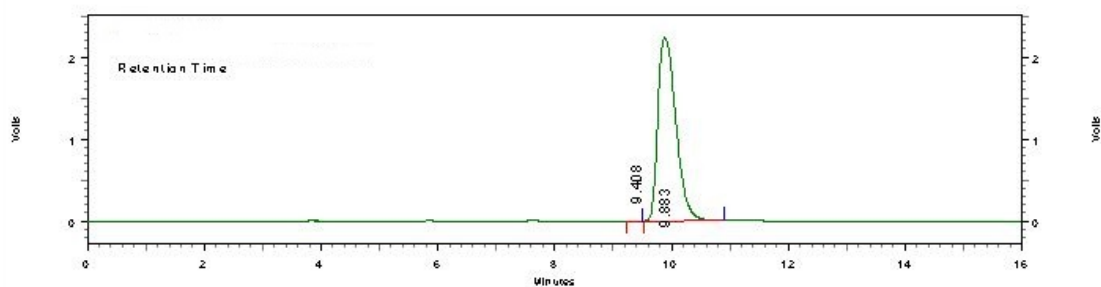

Detector A (254nm)

| PK # | Retention Time | Area     | Area % | Height  | Height % |
|------|----------------|----------|--------|---------|----------|
| 1    | 9.408          | 8345     | 0.017  | 842     | 0.038    |
| 2    | 9.883          | 47786490 | 99.983 | 2231787 | 99.962   |

|        |  |          |         |         |         |
|--------|--|----------|---------|---------|---------|
| Totals |  | 47794835 | 100.000 | 2232629 | 100.000 |
|--------|--|----------|---------|---------|---------|



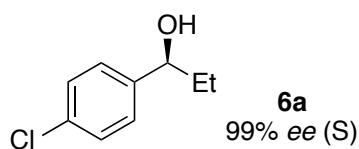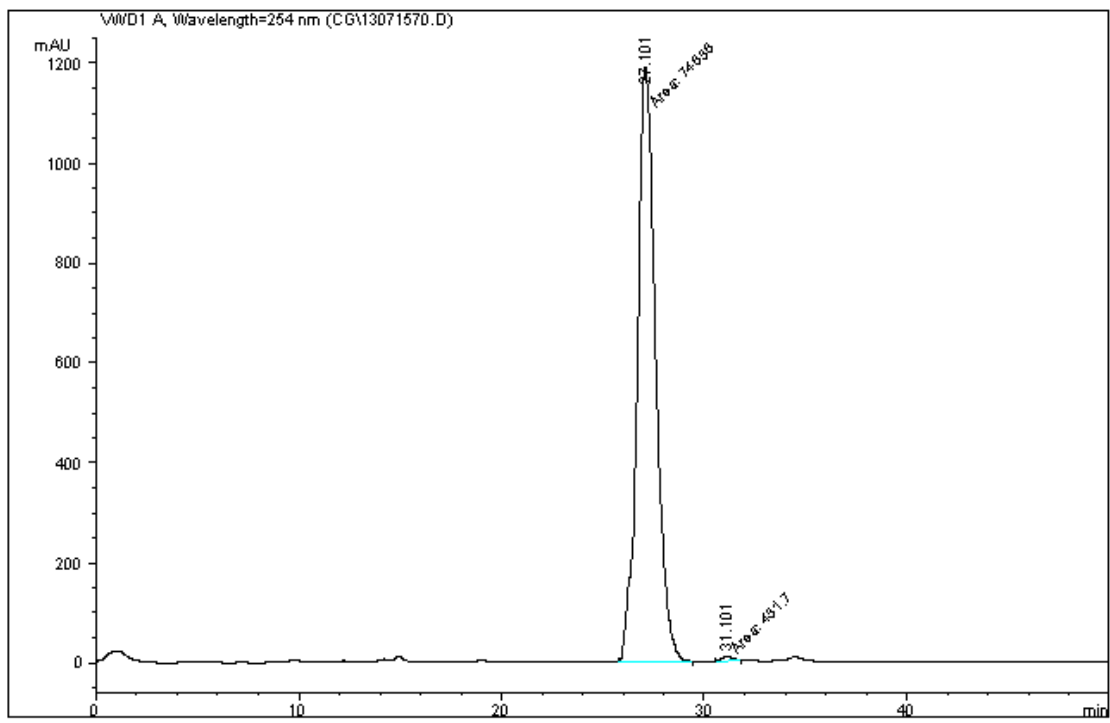

=====  
Area Percent Report  
=====

Sorted By : Signal  
Calib. Data Modified : 12/15/2014 10:11:39 AM  
Multiplier : 1.0000  
Dilution : 1.0000

Signal 1: VWD1 A, Wavelength=254 nm

| Peak # | RetTime [min] | Type | Width [min] | Area mAU  | Area %  | Name |
|--------|---------------|------|-------------|-----------|---------|------|
| 1      | 0.000         |      | 0.0000      | 0.00000   | 0.0000  |      |
| 2      | 12.916        |      | 0.0000      | 0.00000   | 0.0000  |      |
| 3      | 13.848        |      | 0.0000      | 0.00000   | 0.0000  |      |
| 4      | 15.919        |      | 0.0000      | 0.00000   | 0.0000  |      |
| 5      | 27.101        | MM   | 1.0463      | 7.48380e4 | 99.4265 | ?    |
| 6      | 31.101        | MM   | 0.7792      | 431.69977 | 0.5735  | ?    |

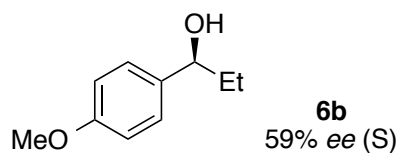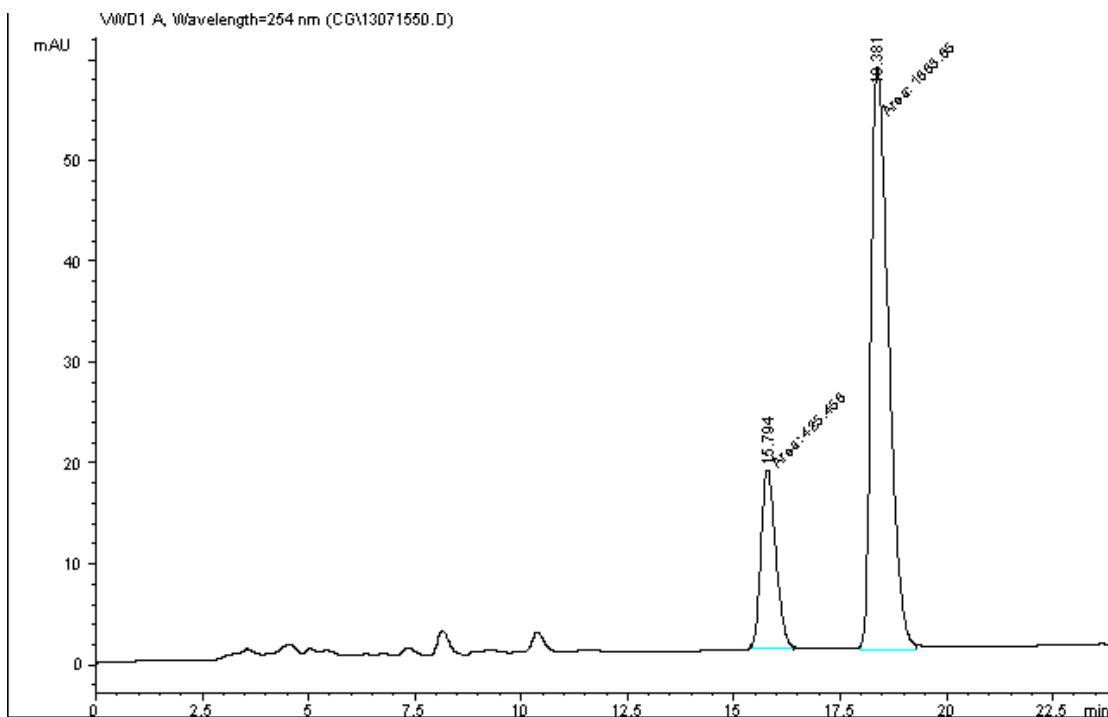

=====  
 Area Percent Report  
 =====

Sorted By : Signal  
 Calib. Data Modified : 12/15/2014 10:11:39 AM  
 Multiplier : 1.0000  
 Dilution : 1.0000

Signal 1: VWD1 A, Wavelength=254 nm

| Peak # | RetTime [min] | Type | Width [min] | Area mAU   | Area %  | Name |
|--------|---------------|------|-------------|------------|---------|------|
| 1      | 0.000         |      | 0.0000      | 0.00000    | 0.0000  |      |
| 2      | 12.916        |      | 0.0000      | 0.00000    | 0.0000  |      |
| 3      | 13.848        |      | 0.0000      | 0.00000    | 0.0000  |      |
| 4      | 15.794 MM     |      | 0.4026      | 425.45630  | 20.3655 |      |
| 5      | 18.381 MM     |      | 0.4781      | 1663.64746 | 79.6345 | ?    |

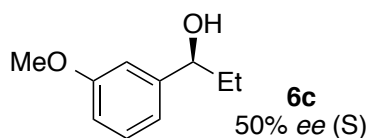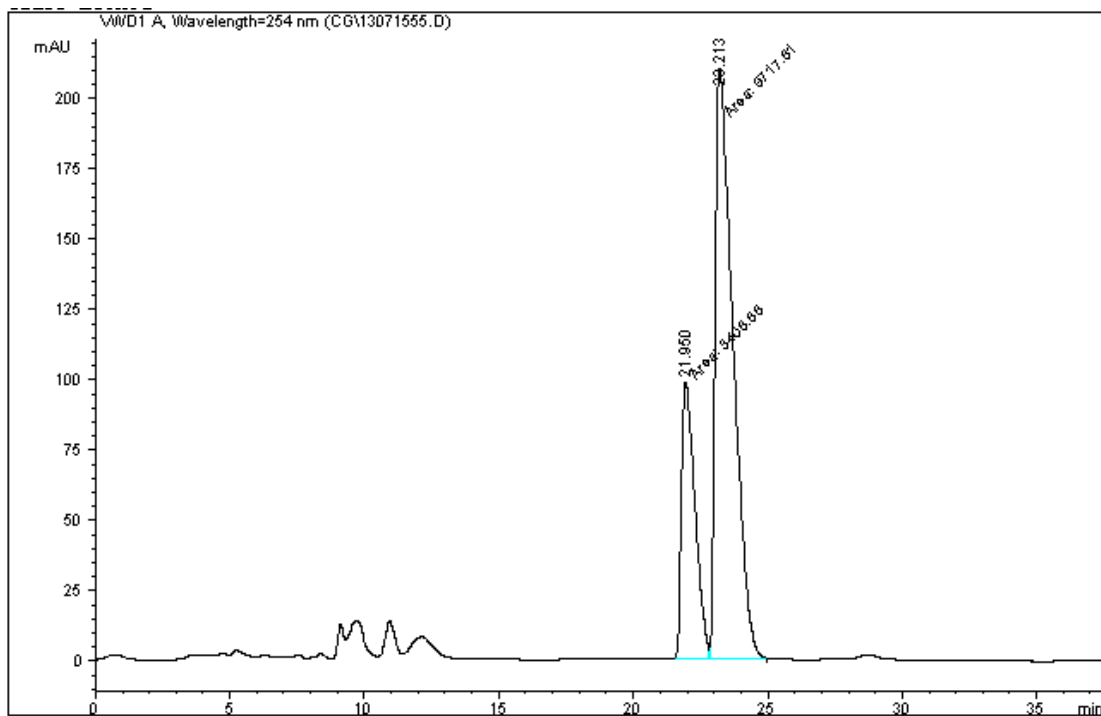

=====  
 Area Percent Report  
 =====

Sorted By : Signal  
 Calib. Data Modified : 12/15/2014 10:11:39 AM  
 Multiplier : 1.0000  
 Dilution : 1.0000

Signal 1: VWD1 A, Wavelength=254 nm

| Peak # | RetTime [min] | Type | Width [min] | Area mAU   | Area %  | Name |
|--------|---------------|------|-------------|------------|---------|------|
| 1      | 0.000         |      | 0.0000      | 0.00000    | 0.0000  |      |
| 2      | 12.916        |      | 0.0000      | 0.00000    | 0.0000  |      |
| 3      | 13.848        |      | 0.0000      | 0.00000    | 0.0000  |      |
| 4      | 15.919        |      | 0.0000      | 0.00000    | 0.0000  |      |
| 5      | 21.950        | MM   | 0.5780      | 3408.86206 | 25.9694 | ?    |
| 6      | 23.213        | MM   | 0.7705      | 9717.60840 | 74.0306 | ?    |

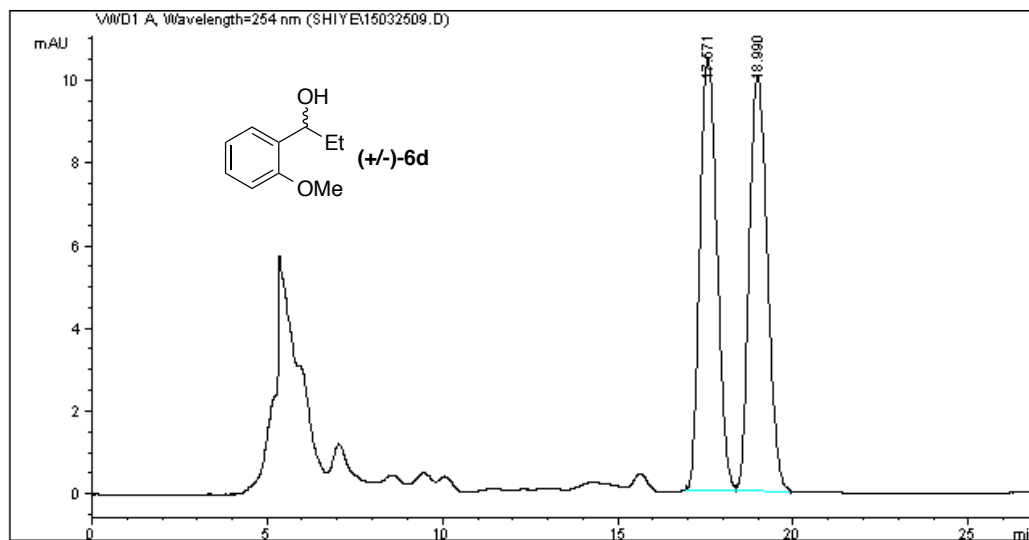

Signal 1: VWD1 A, Wavelength=254 nm

| Peak # | RetTime [min] | Type | Width [min] | Area mAU  | *s | Height [mAU] | Area %  |
|--------|---------------|------|-------------|-----------|----|--------------|---------|
| 1      | 17.571        | BV   | 0.5487      | 356.61942 |    | 10.47279     | 49.7625 |
| 2      | 18.990        | VB   | 0.5627      | 360.02292 |    | 10.07078     | 50.2375 |

Totals : 716.64233 20.54357

=====  
\*\*\* End of Report \*\*\*

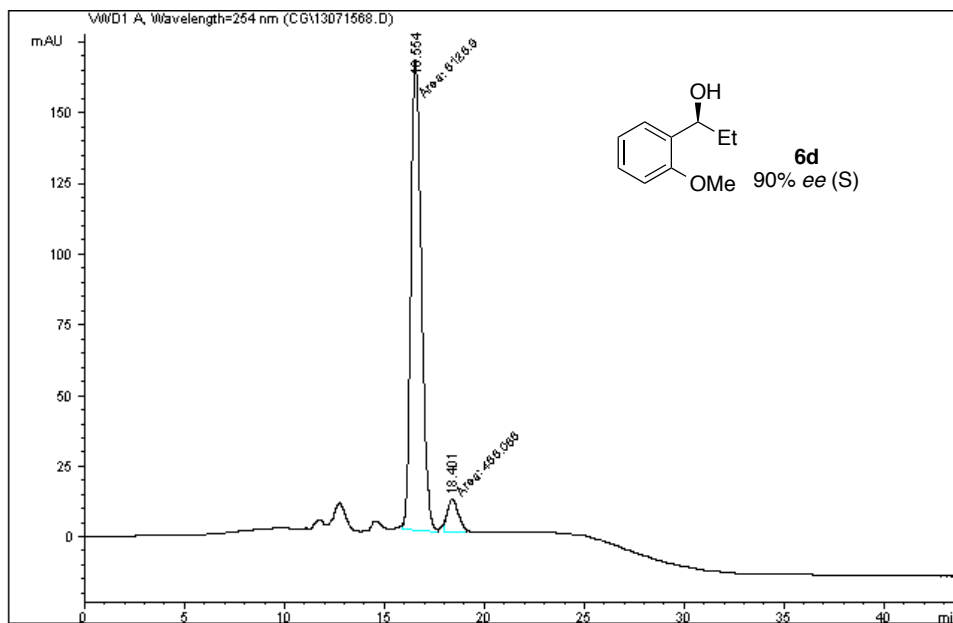

=====  
Area Percent Report  
=====

Sorted By : Signal  
Calib. Data Modified : 12/15/2014 10:11:39 AM  
Multiplier : 1.0000  
Dilution : 1.0000

Signal 1: VWD1 A, Wavelength=254 nm

| Peak # | RetTime [min] | Type | Width [min] | Area mAU   | *s | Area %    | Name |
|--------|---------------|------|-------------|------------|----|-----------|------|
| 1      | 0.000         |      | 0.0000      | 0.00000    |    | 0.0000    |      |
| 2      | 12.916        |      | 0.0000      | 0.00000    |    | 0.0000    |      |
| 3      | 13.848        |      | 0.0000      | 0.00000    |    | 0.0000    |      |
| 4      | 15.919        |      | 0.0000      | 0.00000    |    | 0.0000    |      |
| 5      | 16.554        | MM   | 0.6122      | 6128.90283 |    | 92.9330 ? |      |
| 6      | 18.401        | MM   | 0.6426      | 466.06564  |    | 7.0670 ?  |      |

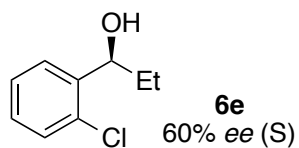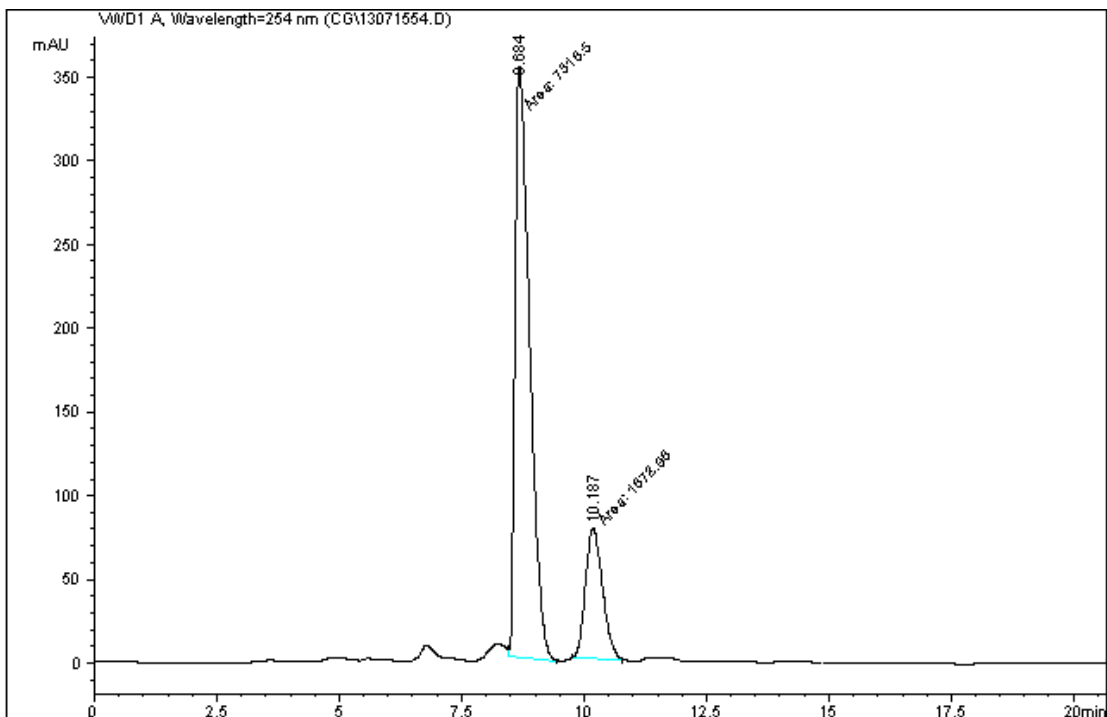

=====  
 Area Percent Report  
 =====

Sorted By : Signal  
 Calib. Data Modified : 12/15/2014 10:11:39 AM  
 Multiplier : 1.0000  
 Dilution : 1.0000

Signal 1: VWD1 A, Wavelength=254 nm

| Peak # | RetTime [min] | Type | Width [min] | Area mAU   | Area %  | Name |
|--------|---------------|------|-------------|------------|---------|------|
| 1      | 0.000         |      | 0.0000      | 0.00000    | 0.0000  |      |
| 2      | 8.684         | MM   | 0.3449      | 7318.49512 | 79.6228 | ?    |
| 3      | 10.187        | MM   | 0.4009      | 1872.96252 | 20.3772 | ?    |
| 4      | 12.916        |      | 0.0000      | 0.00000    | 0.0000  |      |
| 5      | 13.848        |      | 0.0000      | 0.00000    | 0.0000  |      |
| 6      | 15.919        |      | 0.0000      | 0.00000    | 0.0000  |      |

## **VI. NMR spectra data**

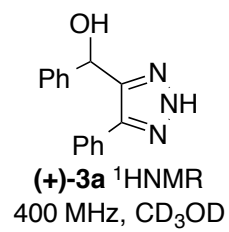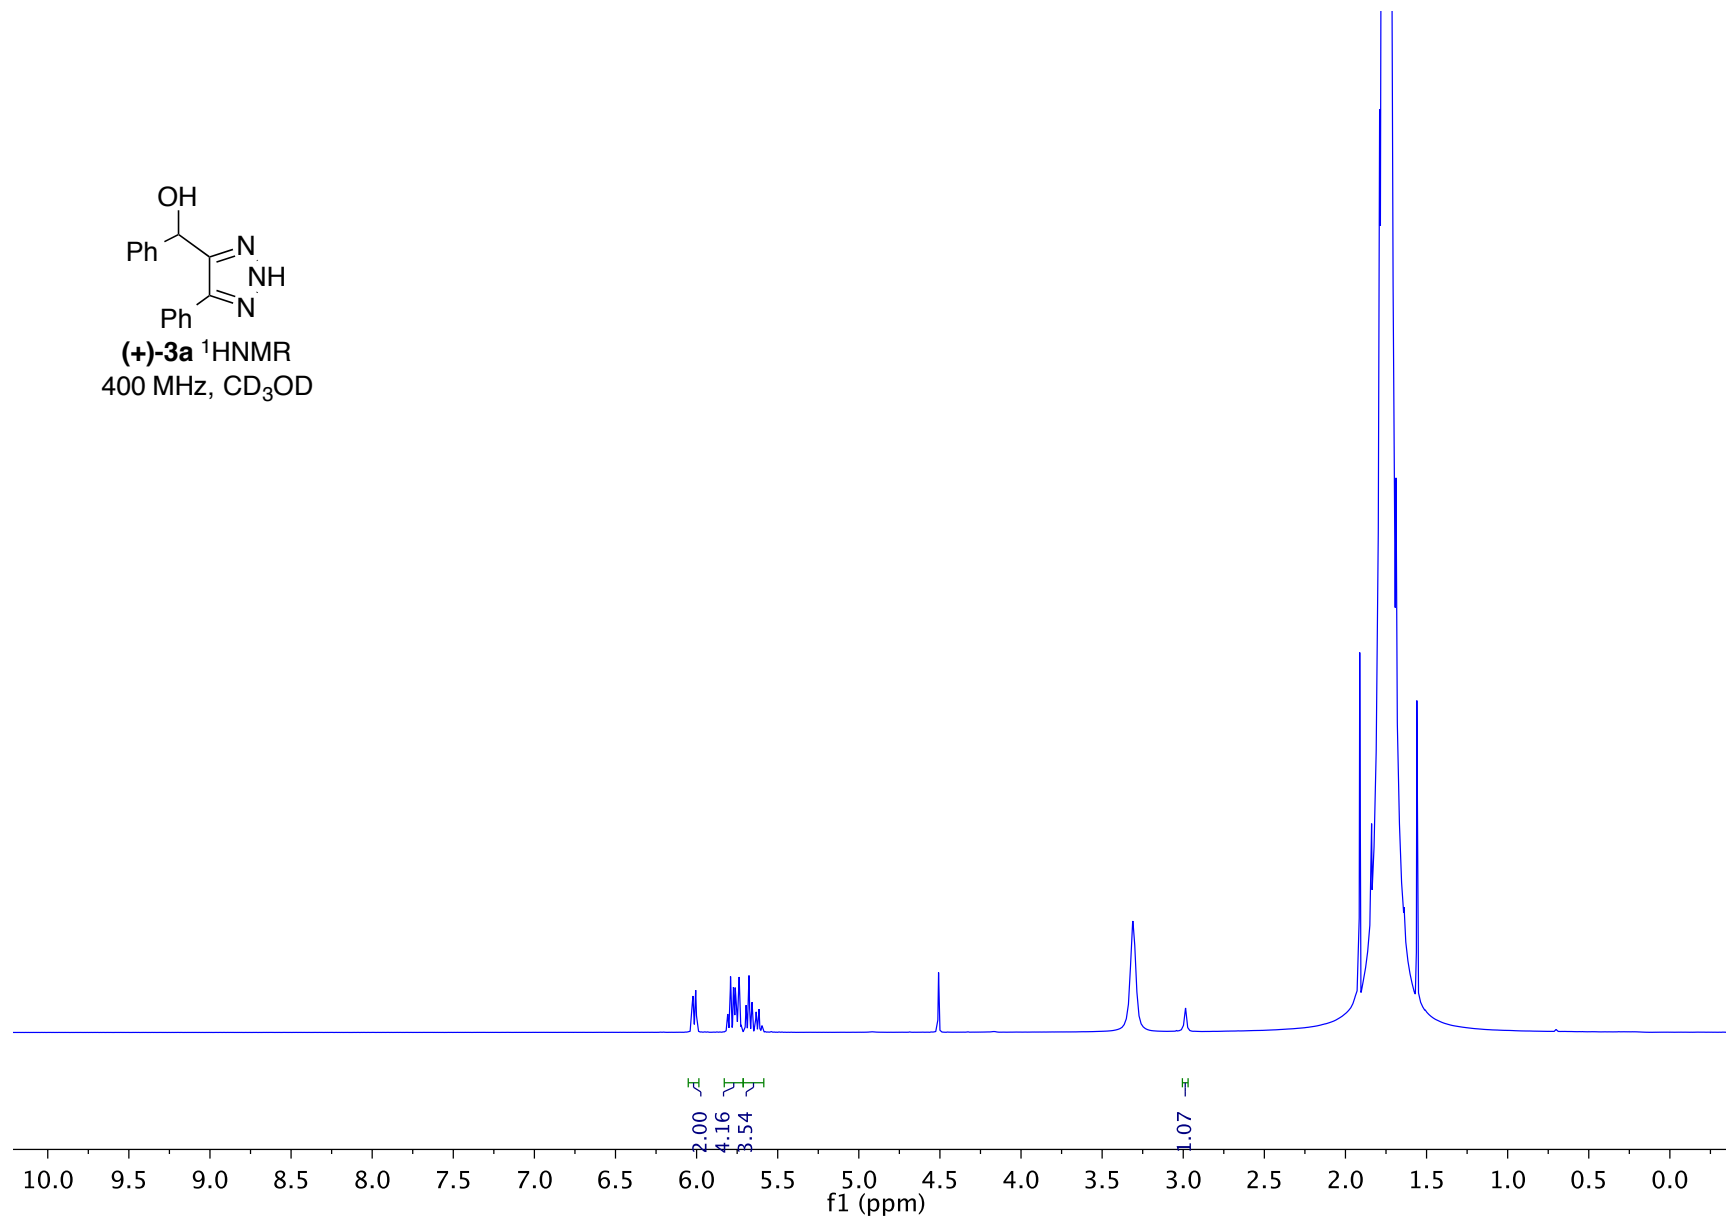

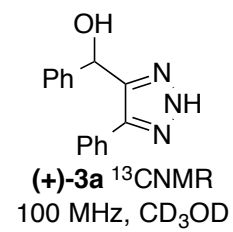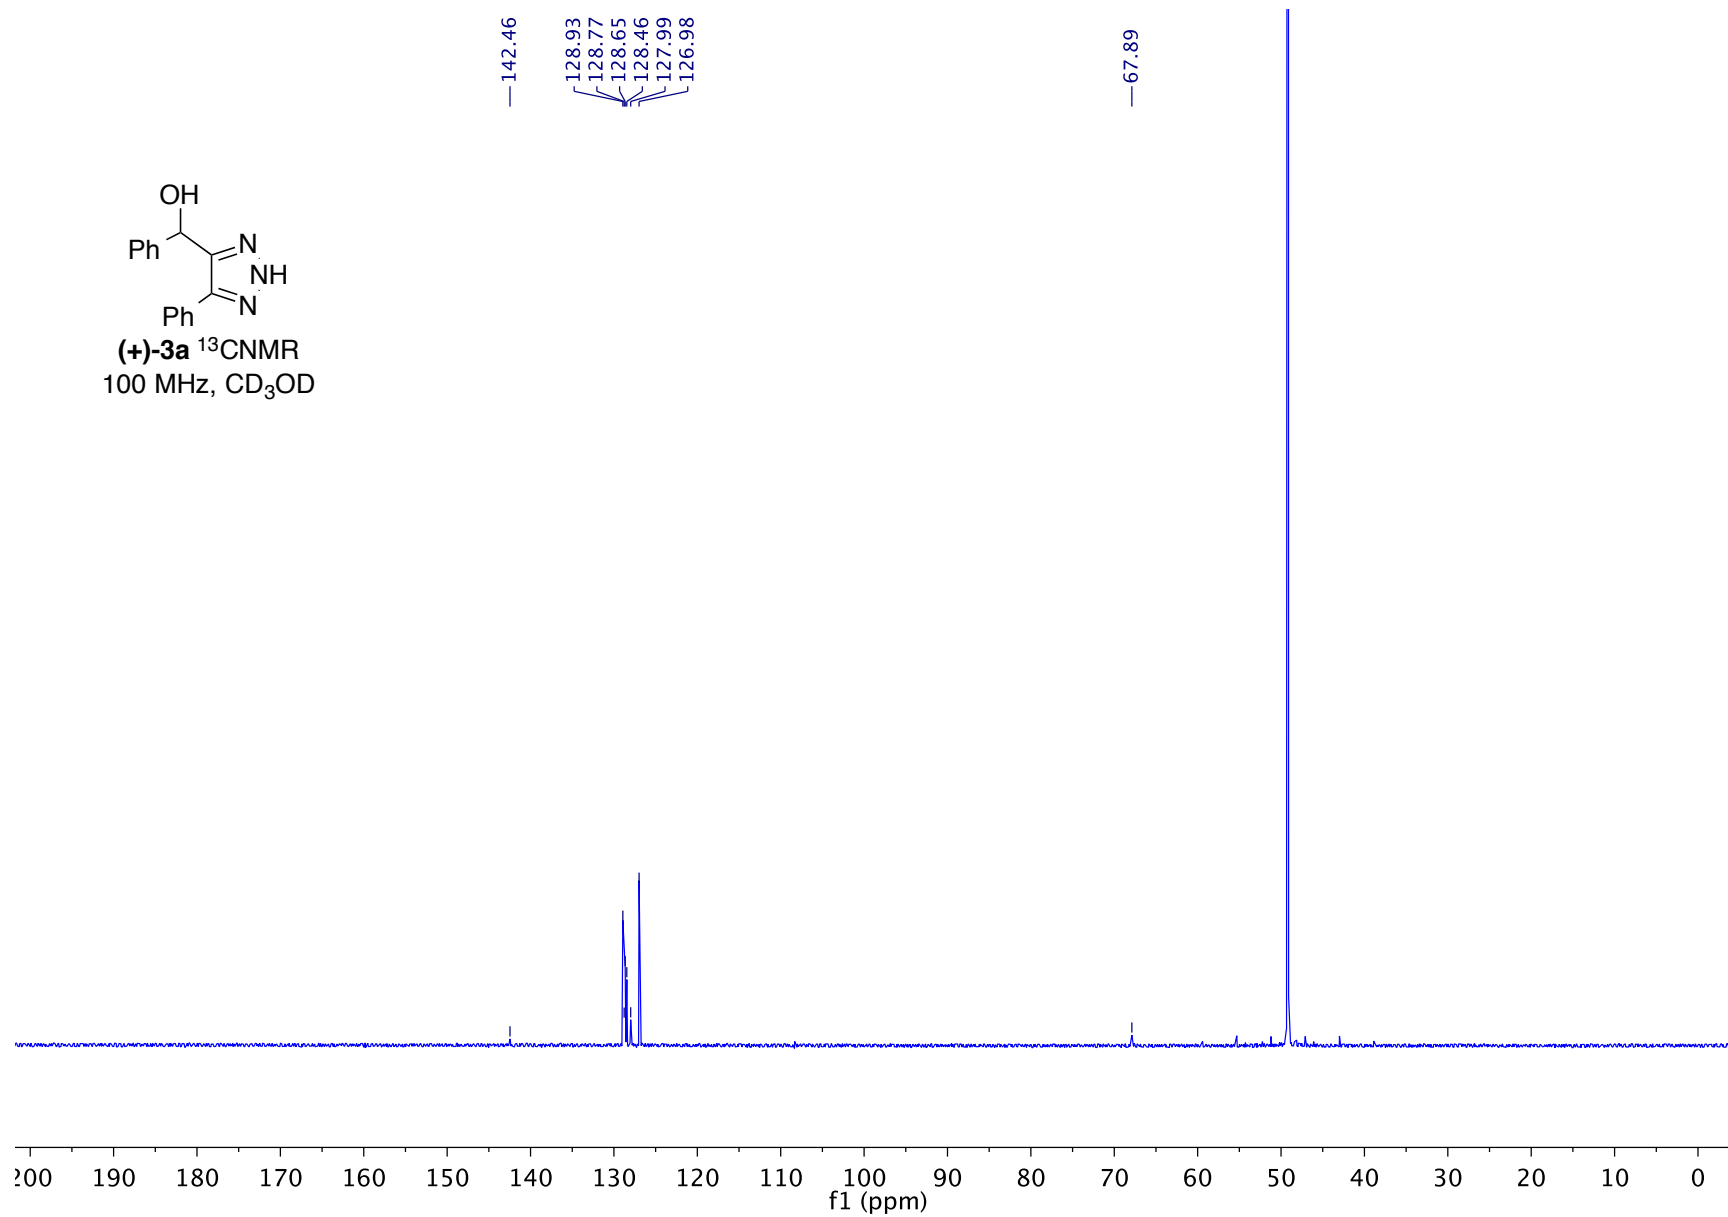



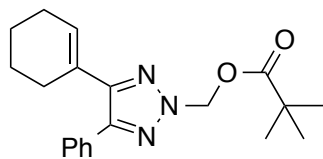

**1c**  $^1\text{H}$ NMR  
400 MHz,  $\text{CDCl}_3$

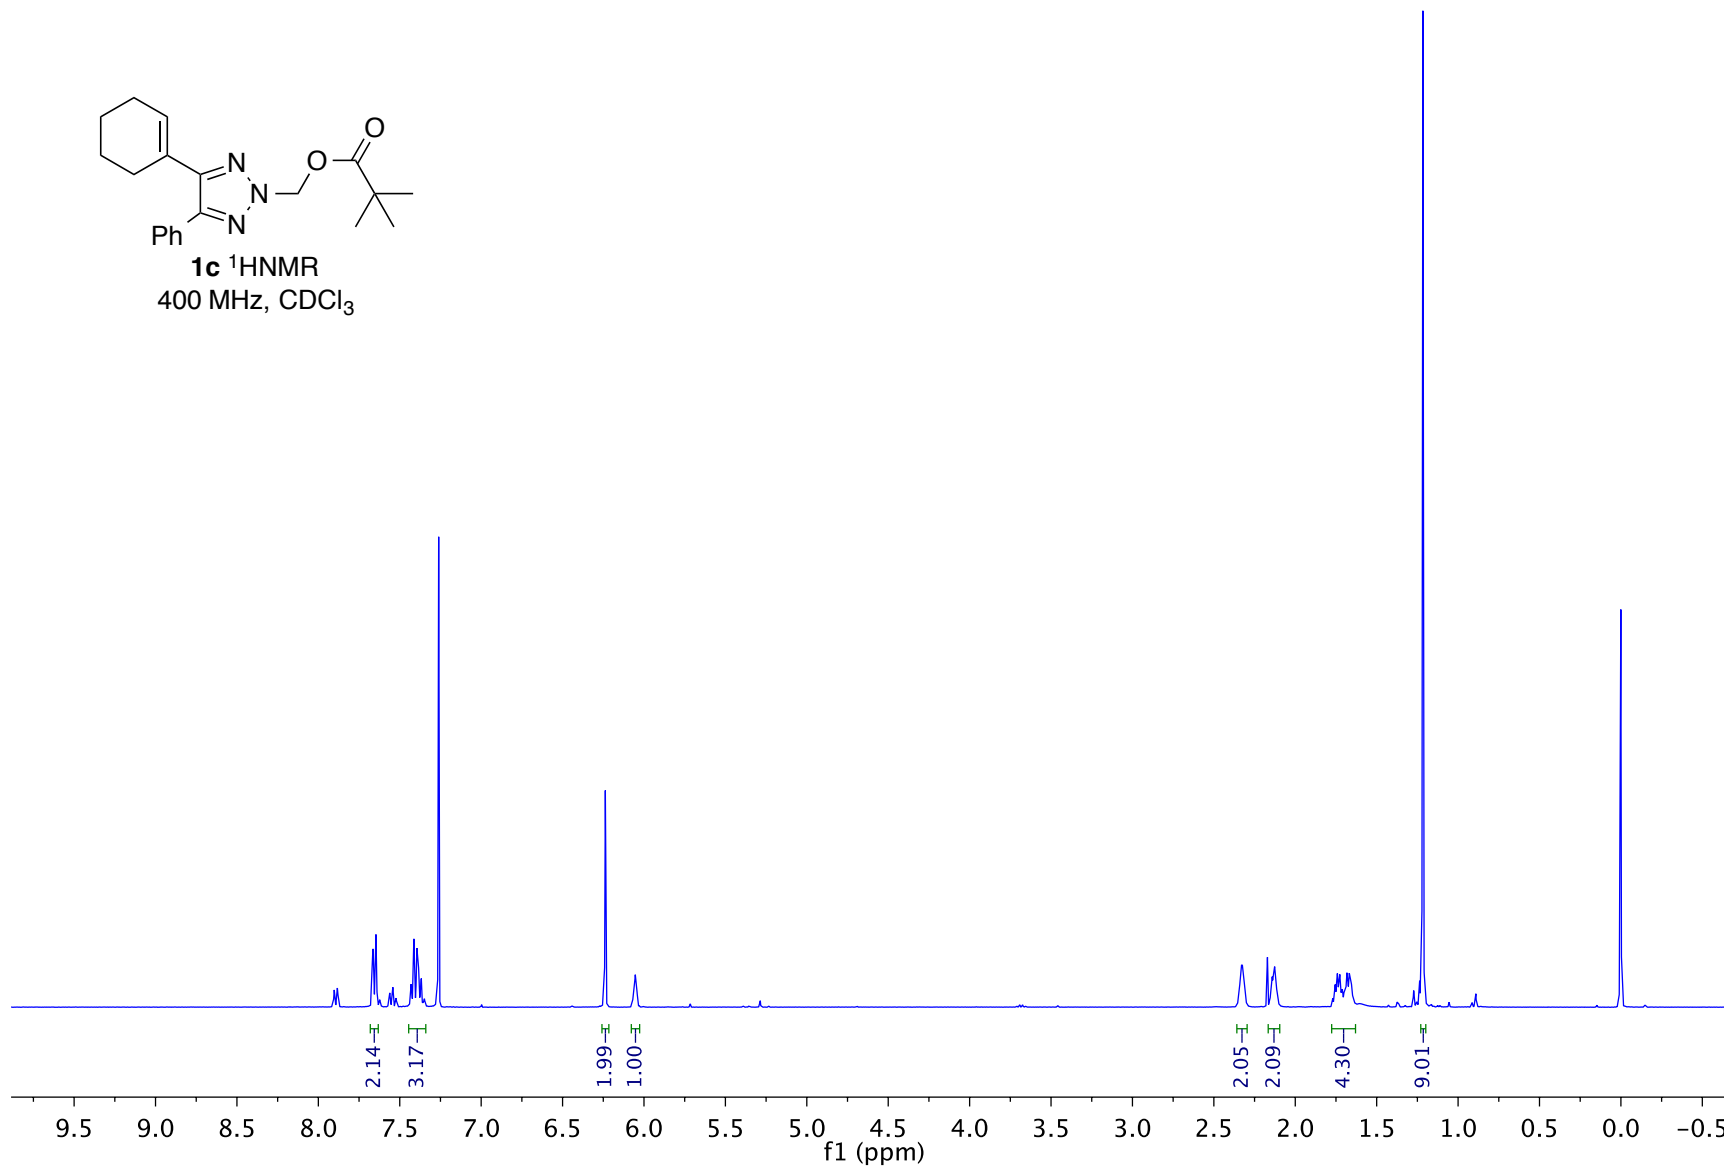

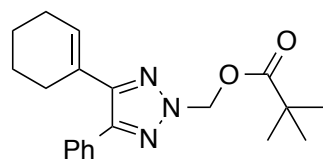

**1c**  $^{13}\text{C}$ NMR  
100 MHz,  $\text{CDCl}_3$

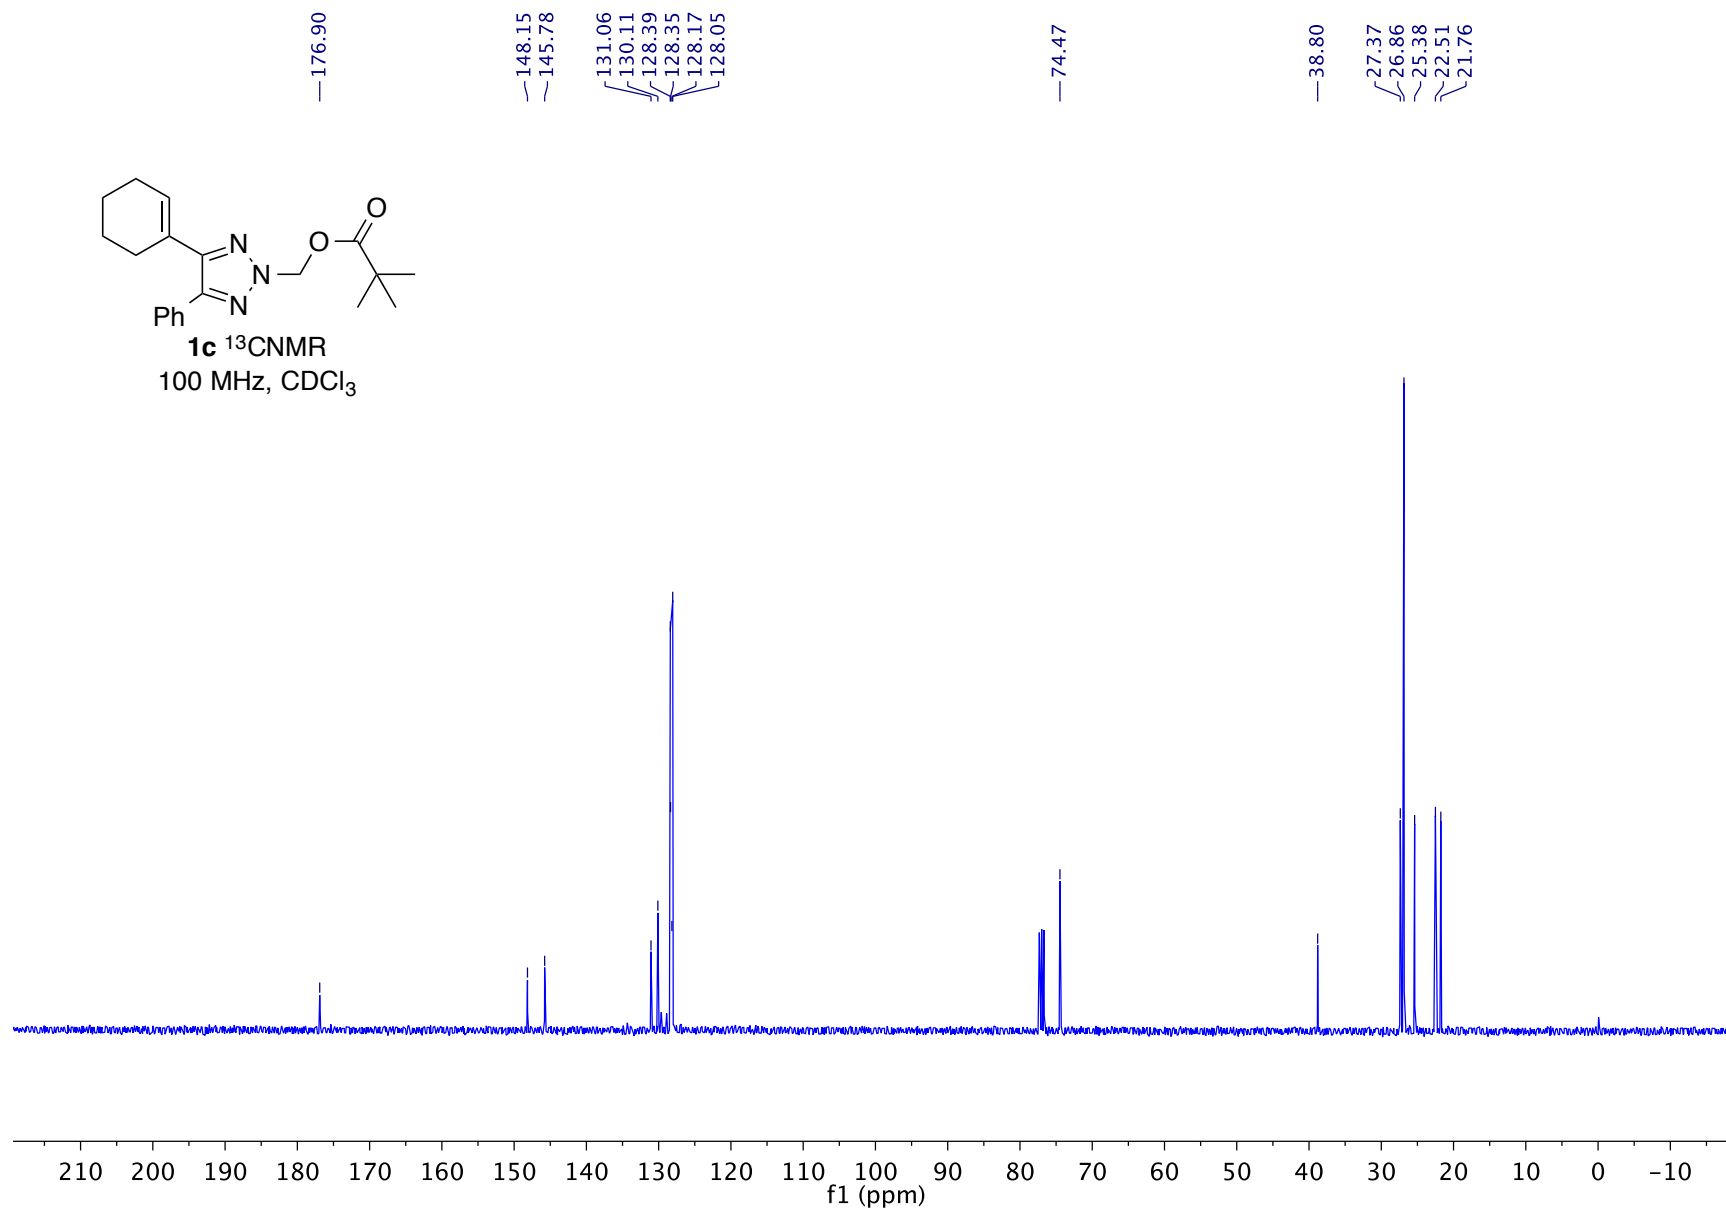

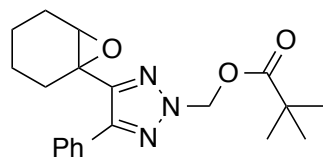

**1d**  $^1\text{H}$ NMR  
400 MHz,  $\text{CDCl}_3$

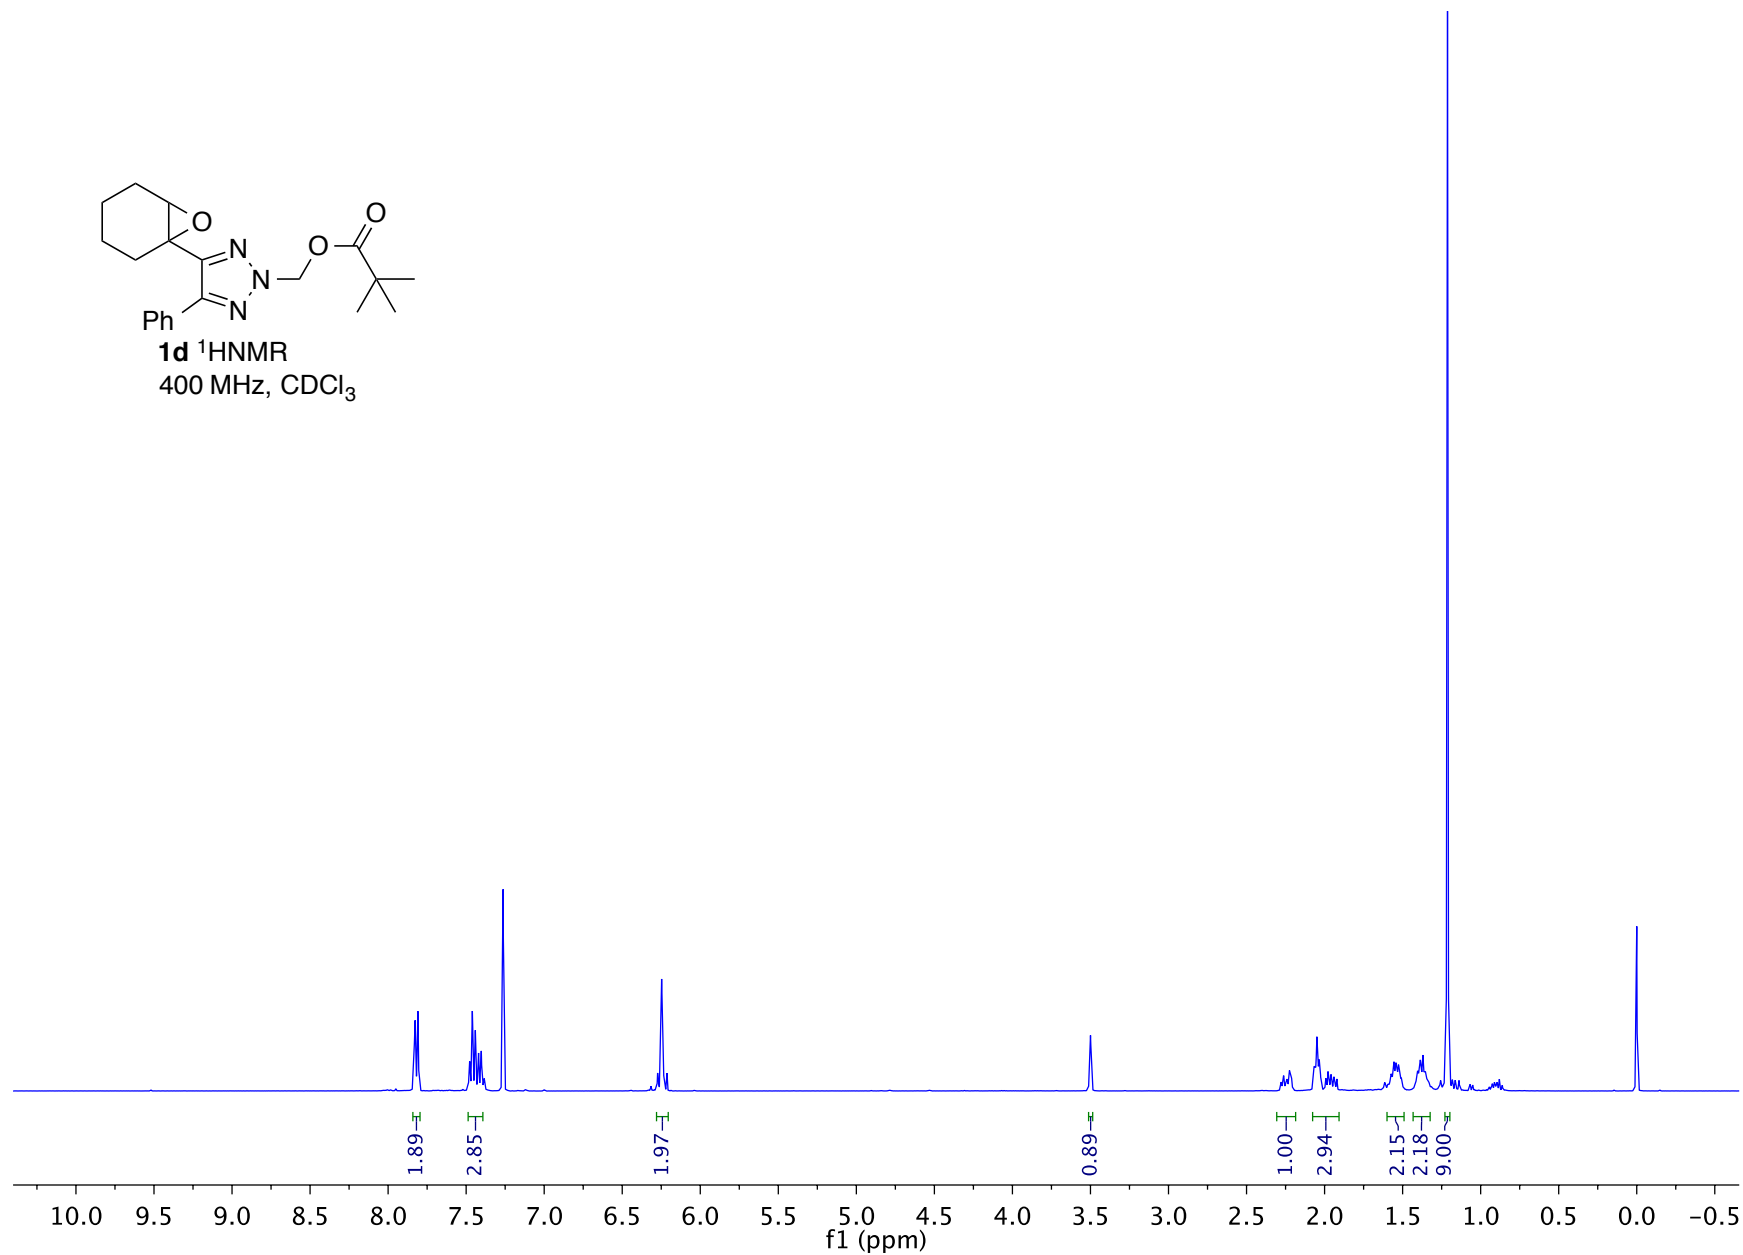



**1d**  $^{13}\text{C}$ NMR  
100 MHz,  $\text{CDCl}_3$

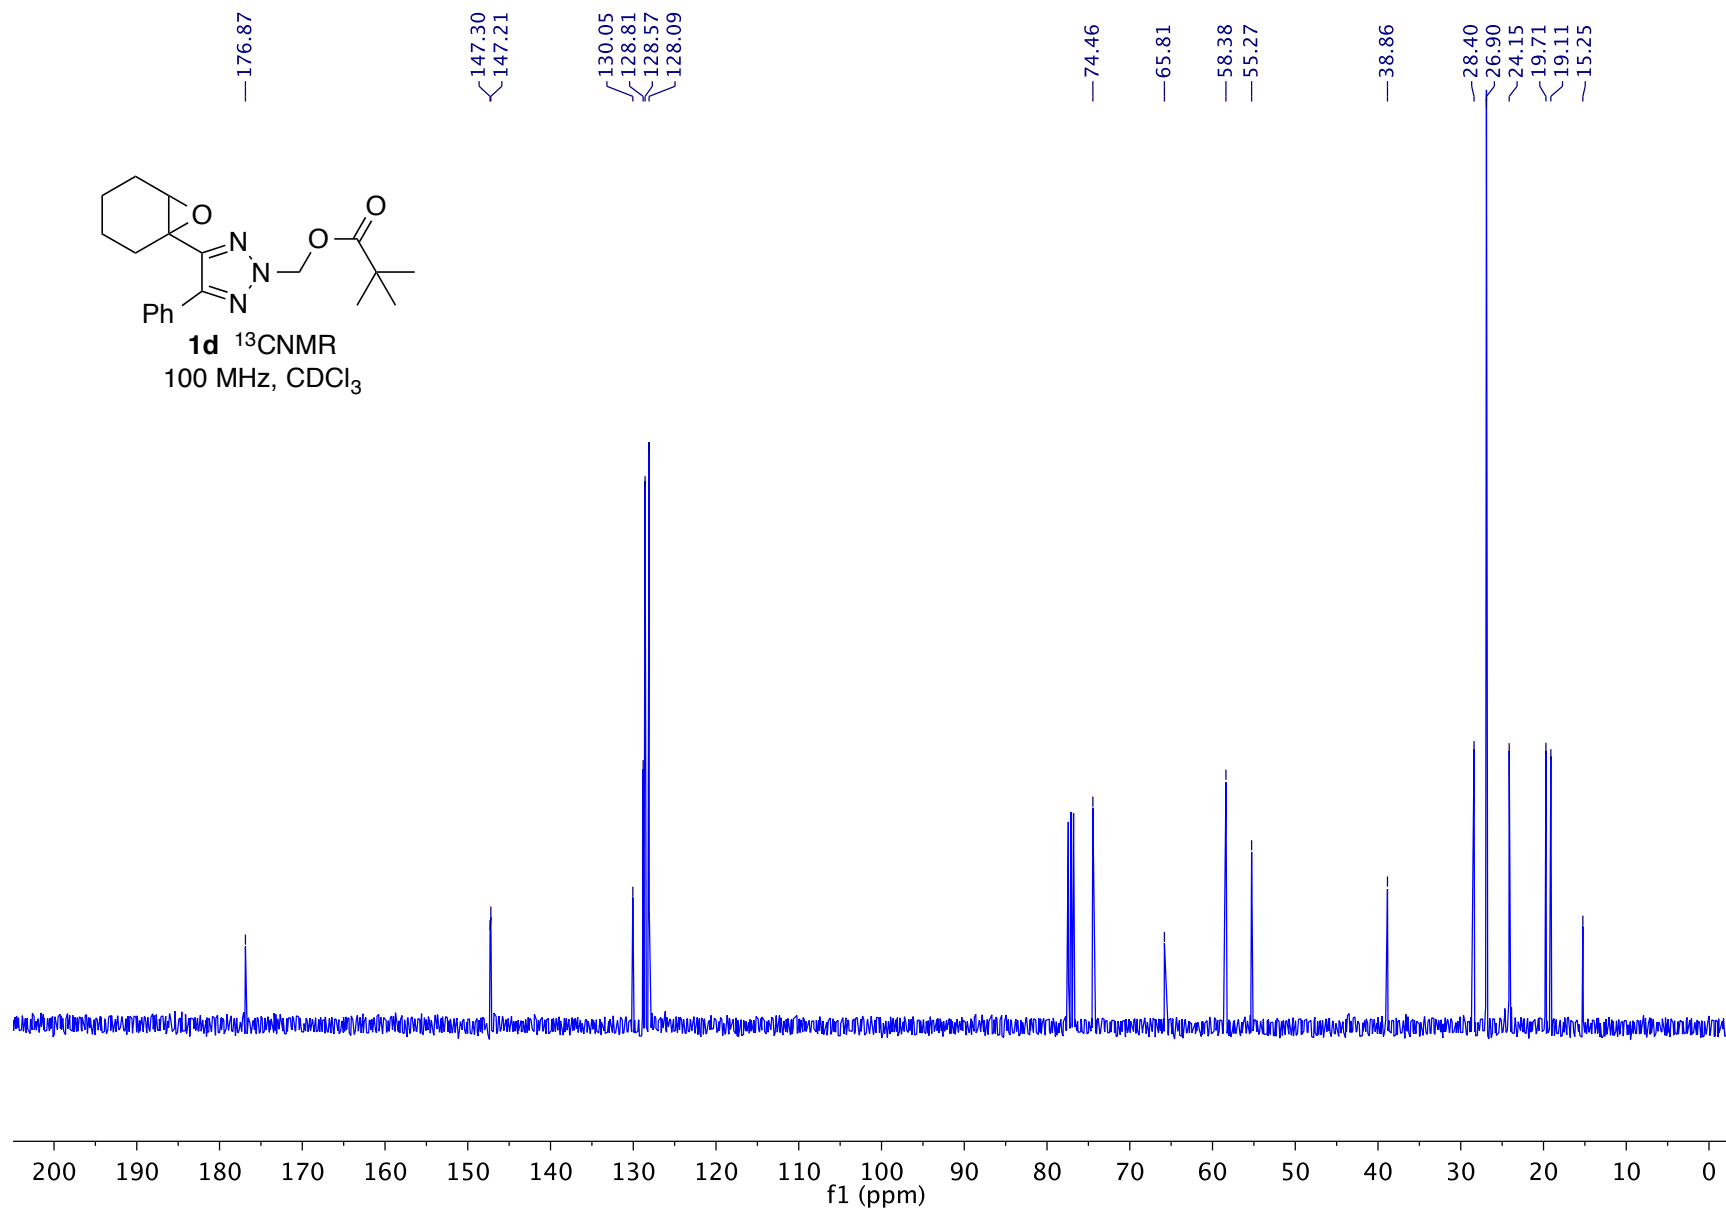

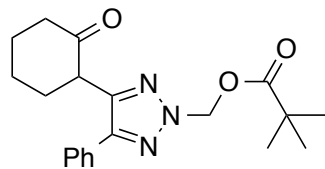

**1e**  $^1\text{H}$ NMR  
400 MHz,  $\text{CDCl}_3$

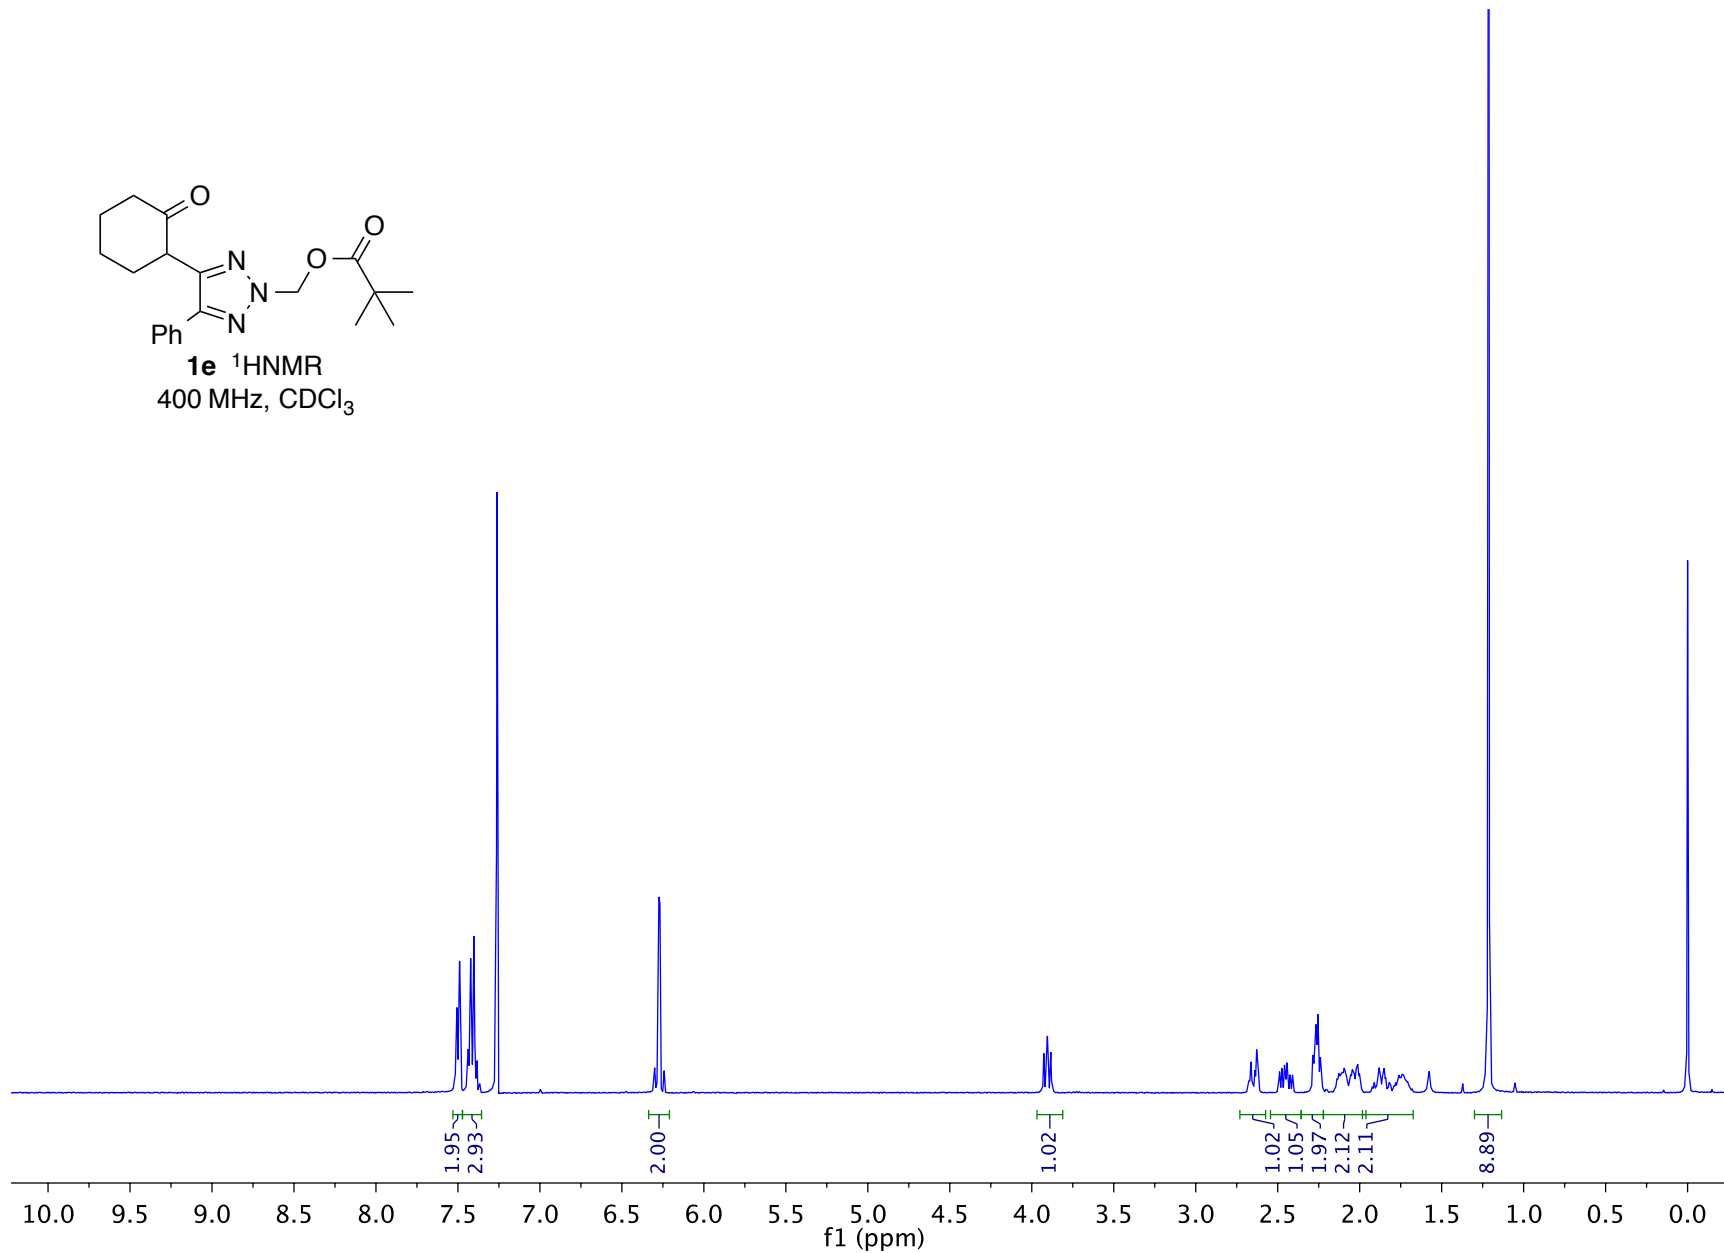

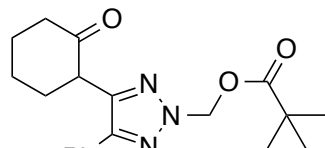

**1e**  $^{13}\text{C}$ NMR  
100 MHz,  $\text{CDCl}_3$

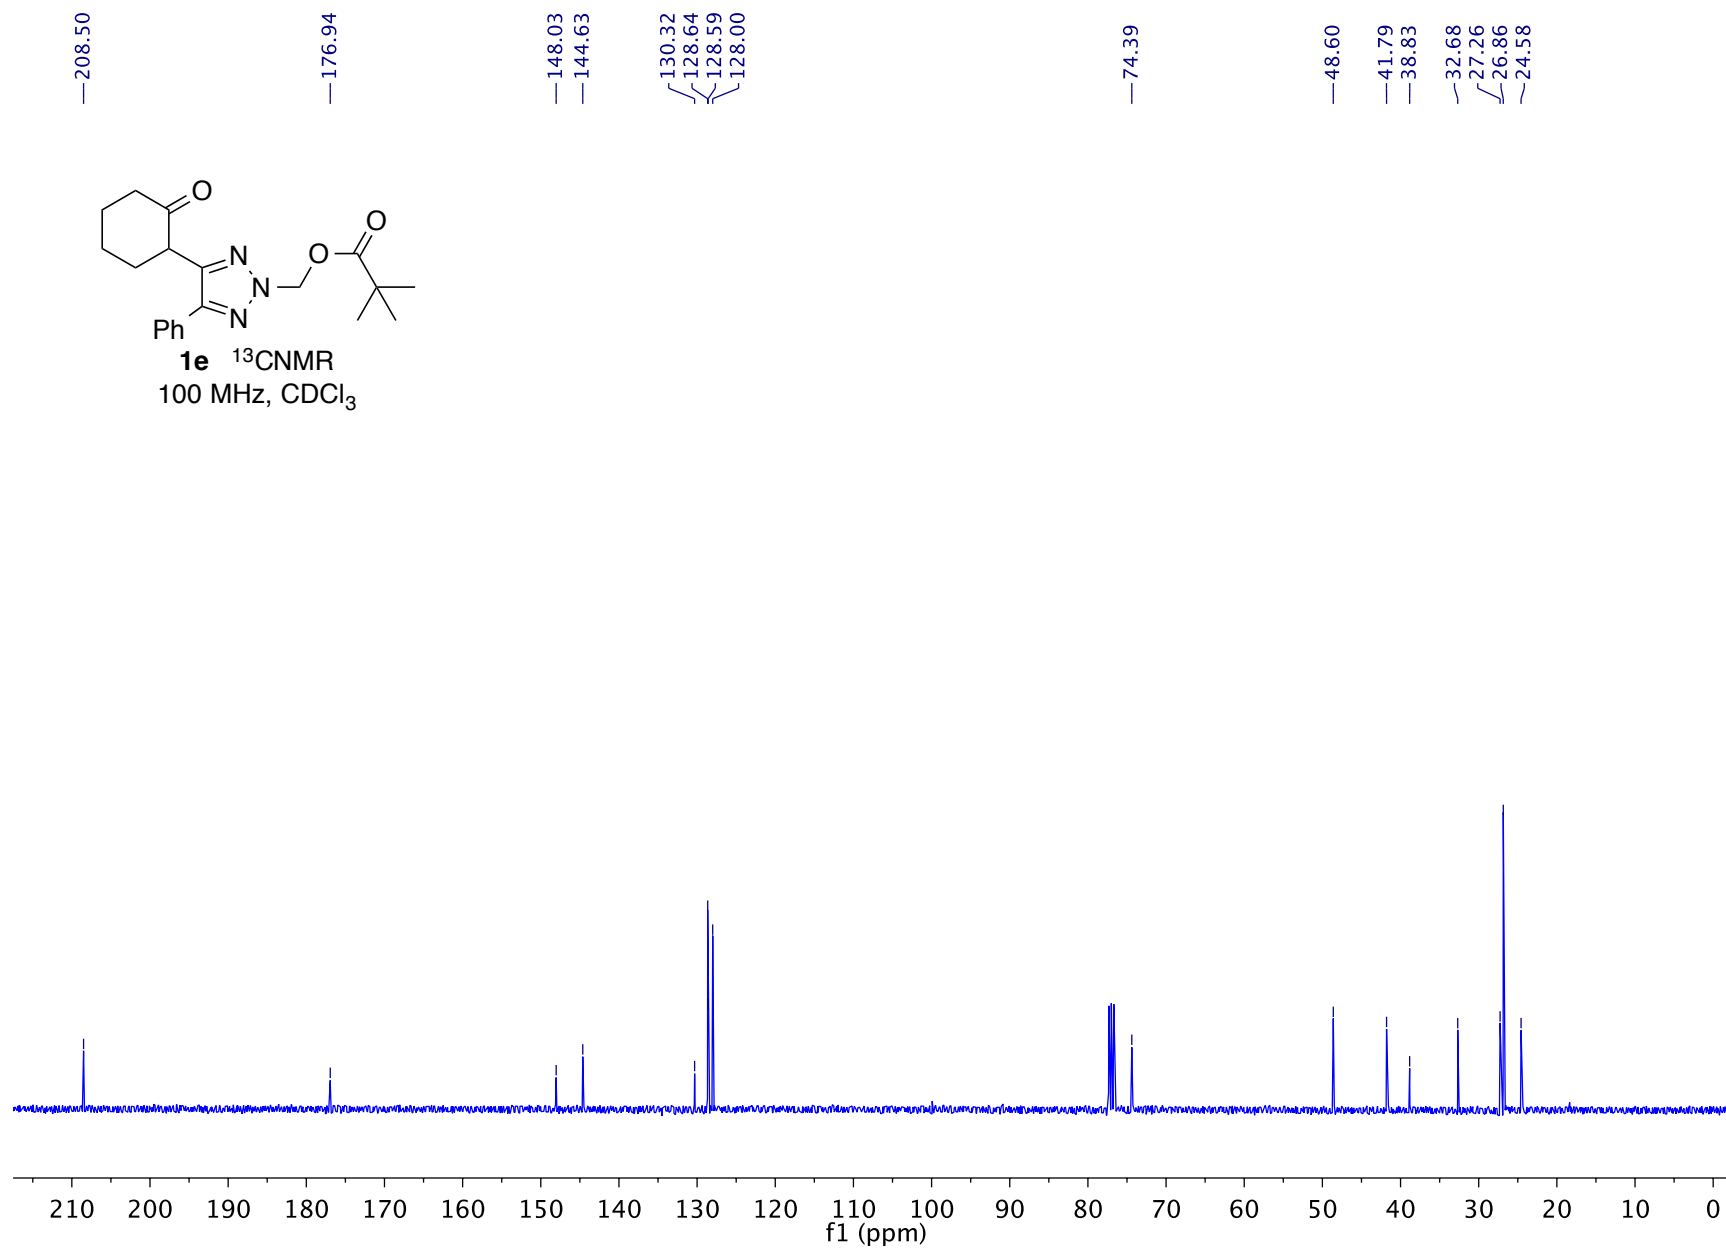

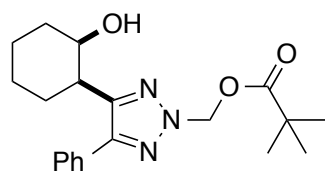

**5a**  $^1\text{H}$ NMR  
400 MHz,  $\text{CDCl}_3$

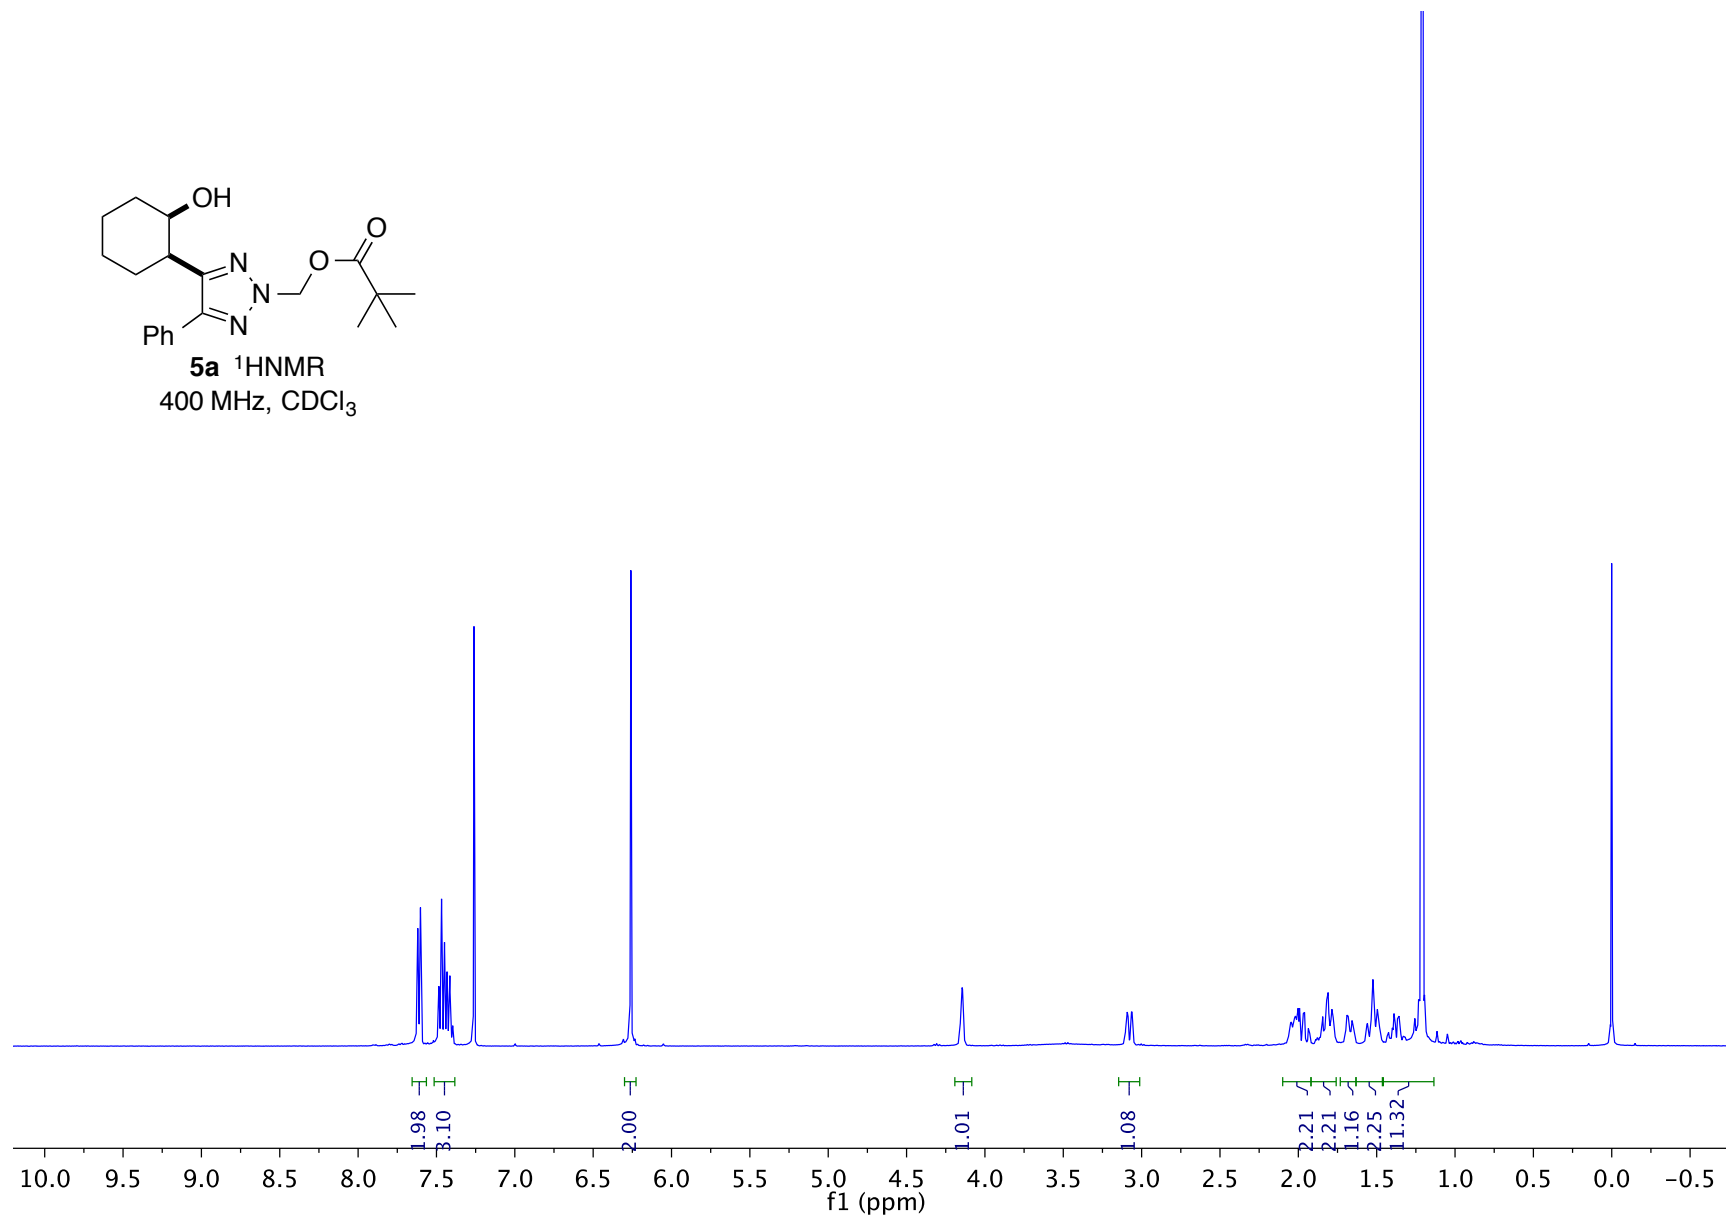

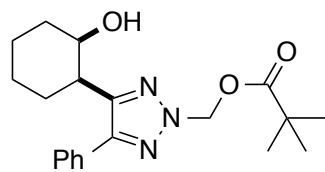

**5a**  $^{13}\text{C}$ NMR  
100 MHz,  $\text{CDCl}_3$

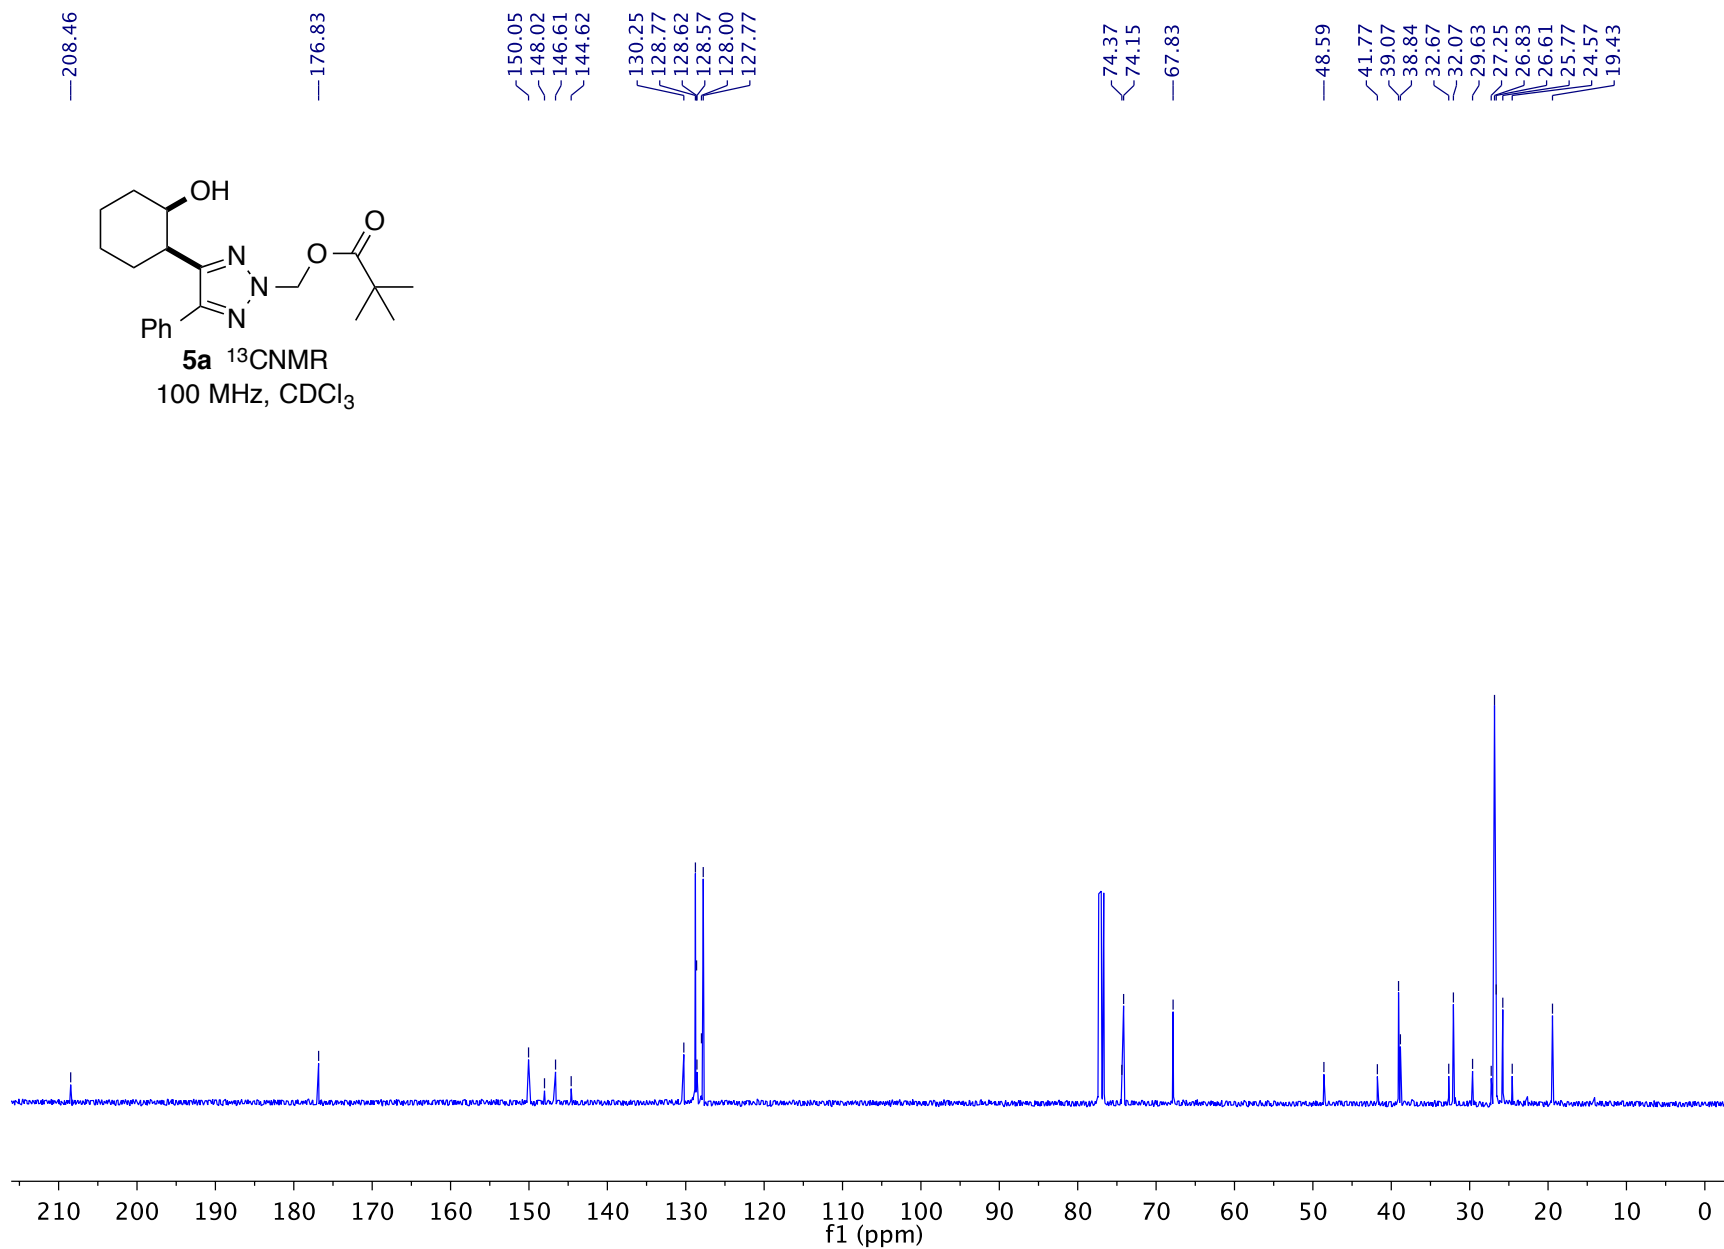



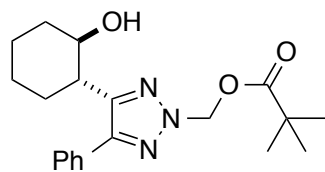

**5b**  $^1\text{H}$ NMR  
400 MHz,  $\text{CDCl}_3$

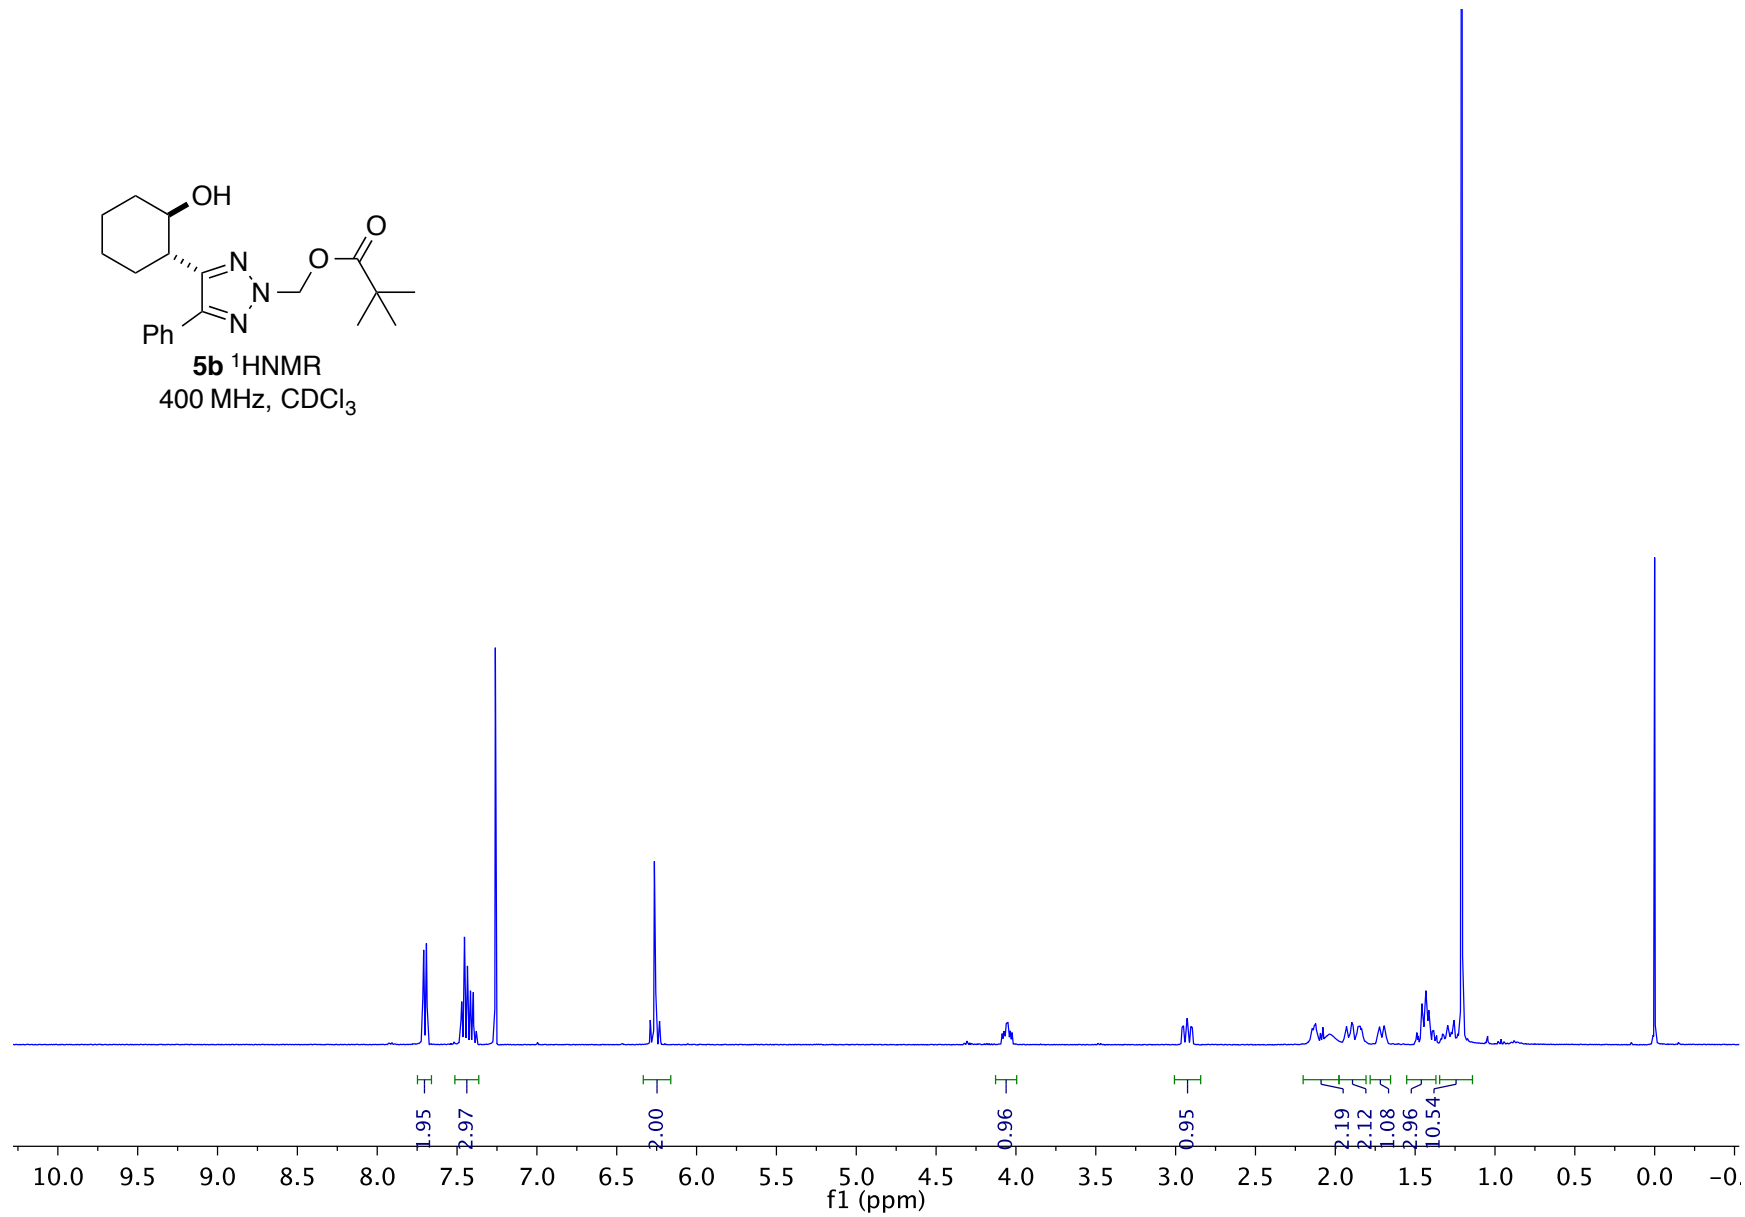

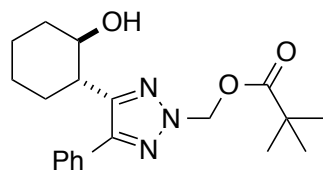

**5b**  $^{13}\text{C}$ NMR  
100 MHz,  $\text{CDCl}_3$

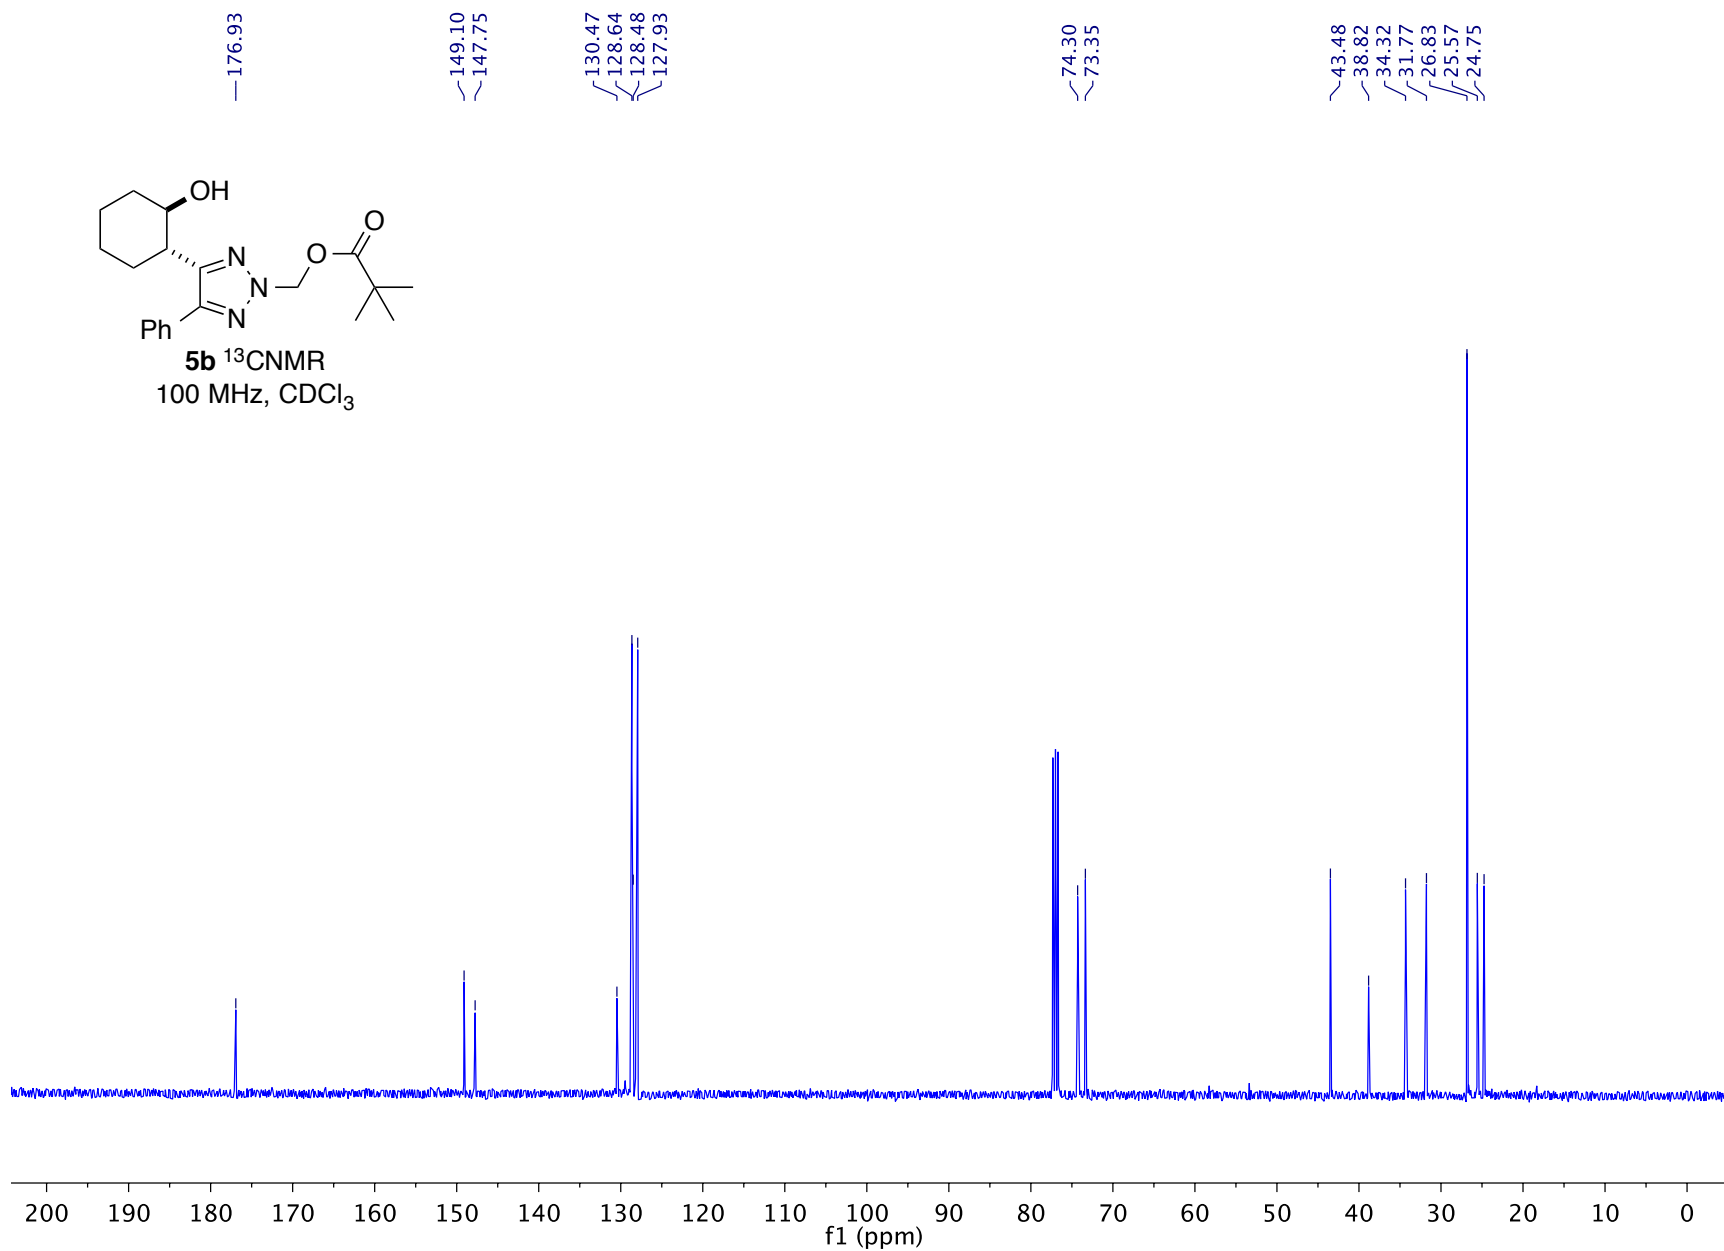

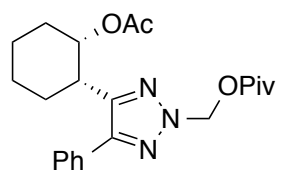

(+)-5a'  $^1\text{H}$ NMR  
400 MHz,  $\text{CDCl}_3$

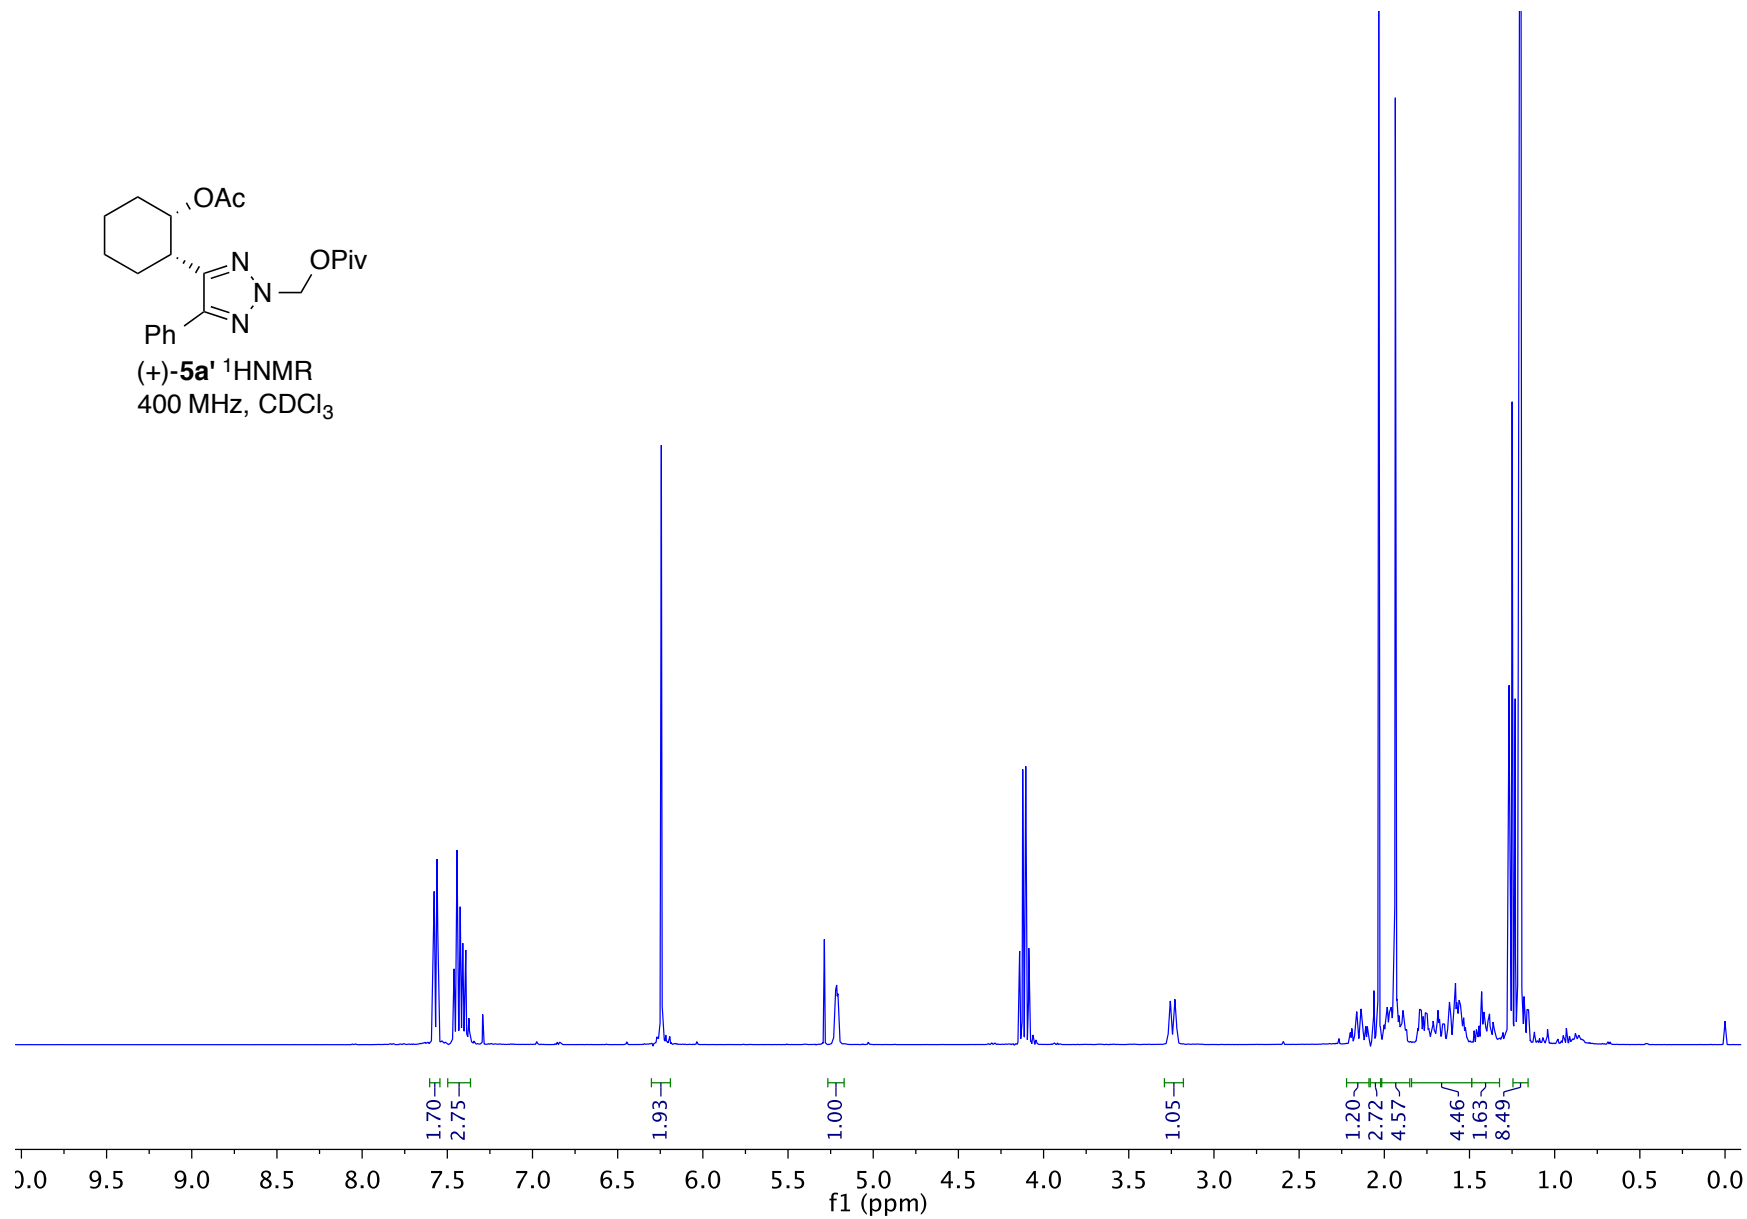



(+)-5a'  $^{13}\text{C}$ NMR  
100 MHz,  $\text{CDCl}_3$

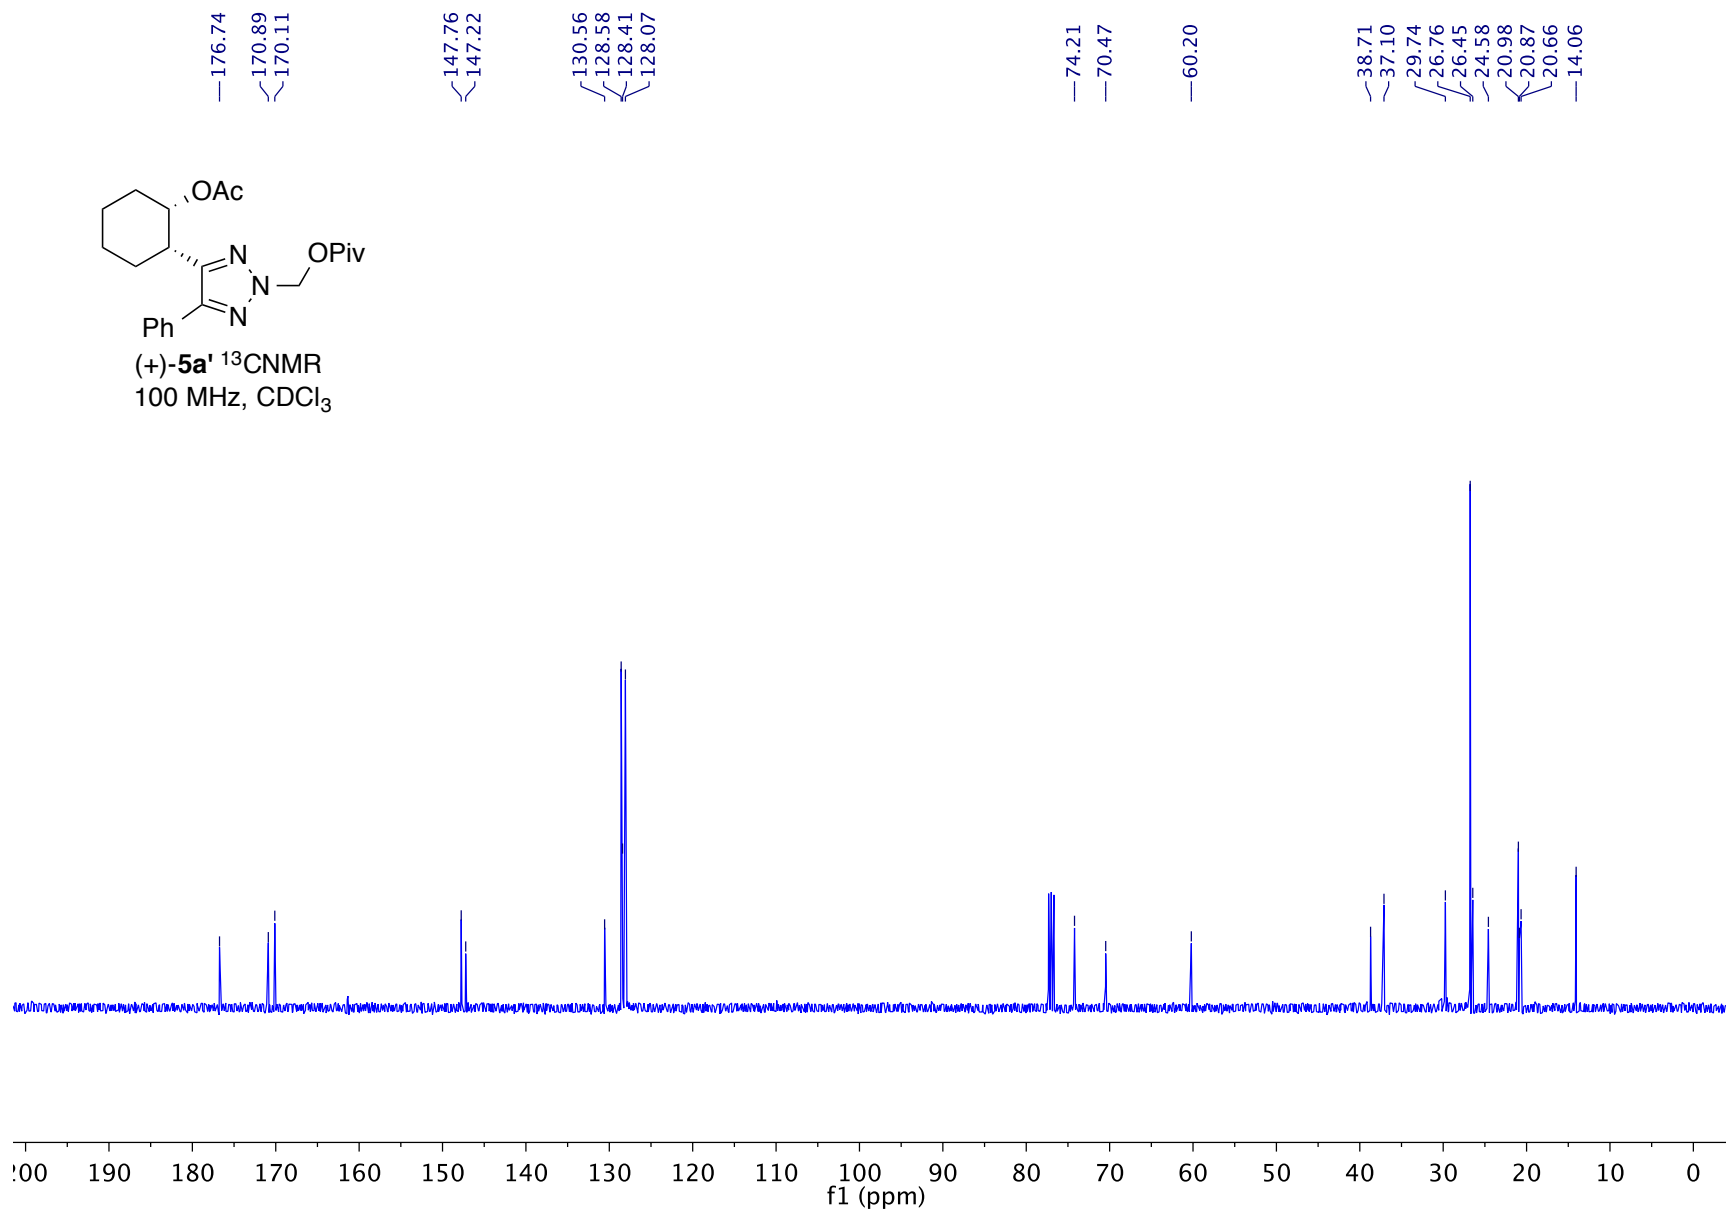

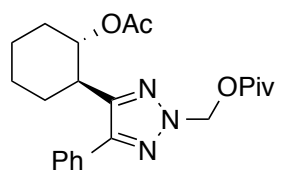

(-)-**5b'**  $^1\text{H}$ NMR  
400 MHz,  $\text{CDCl}_3$

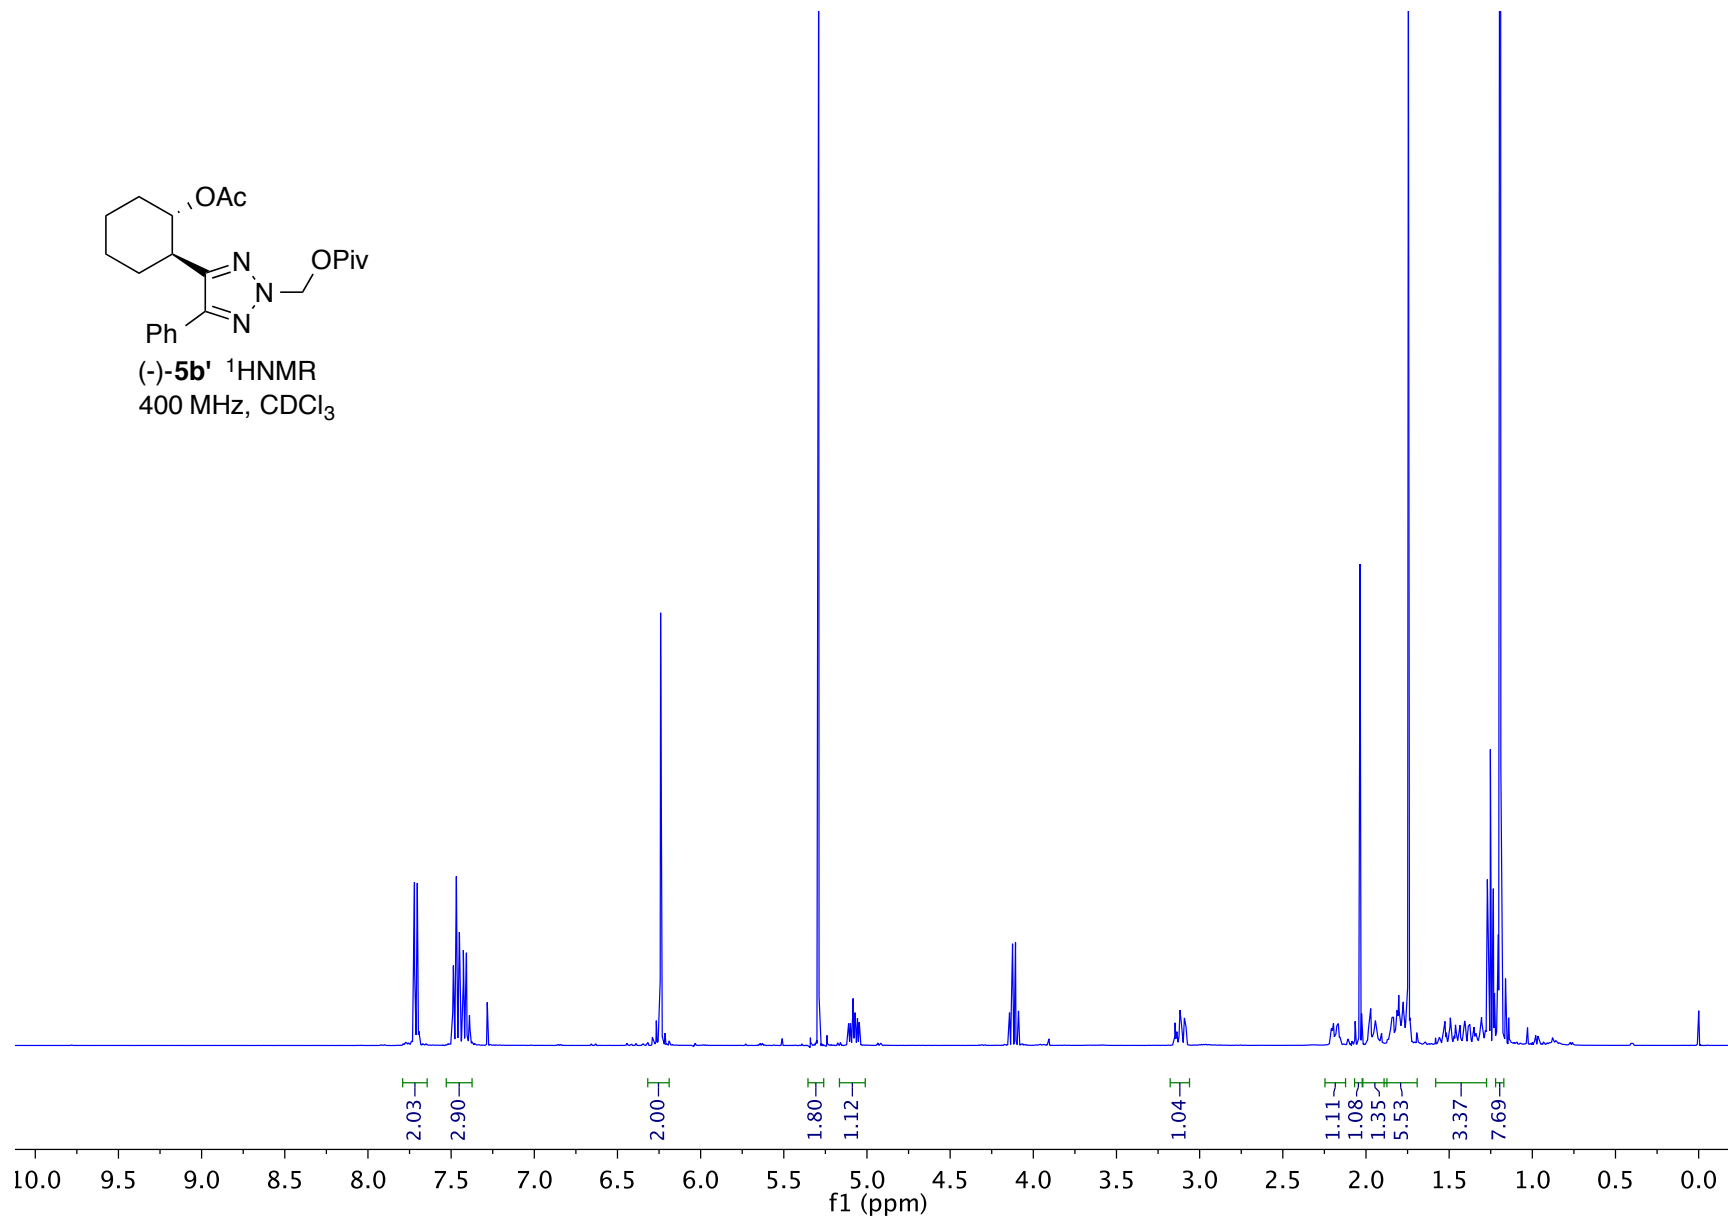

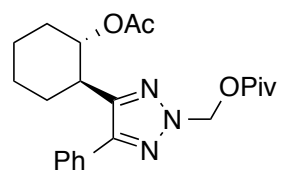

(-)-5b'  $^{13}\text{C}$ NMR  
100 MHz,  $\text{CDCl}_3$

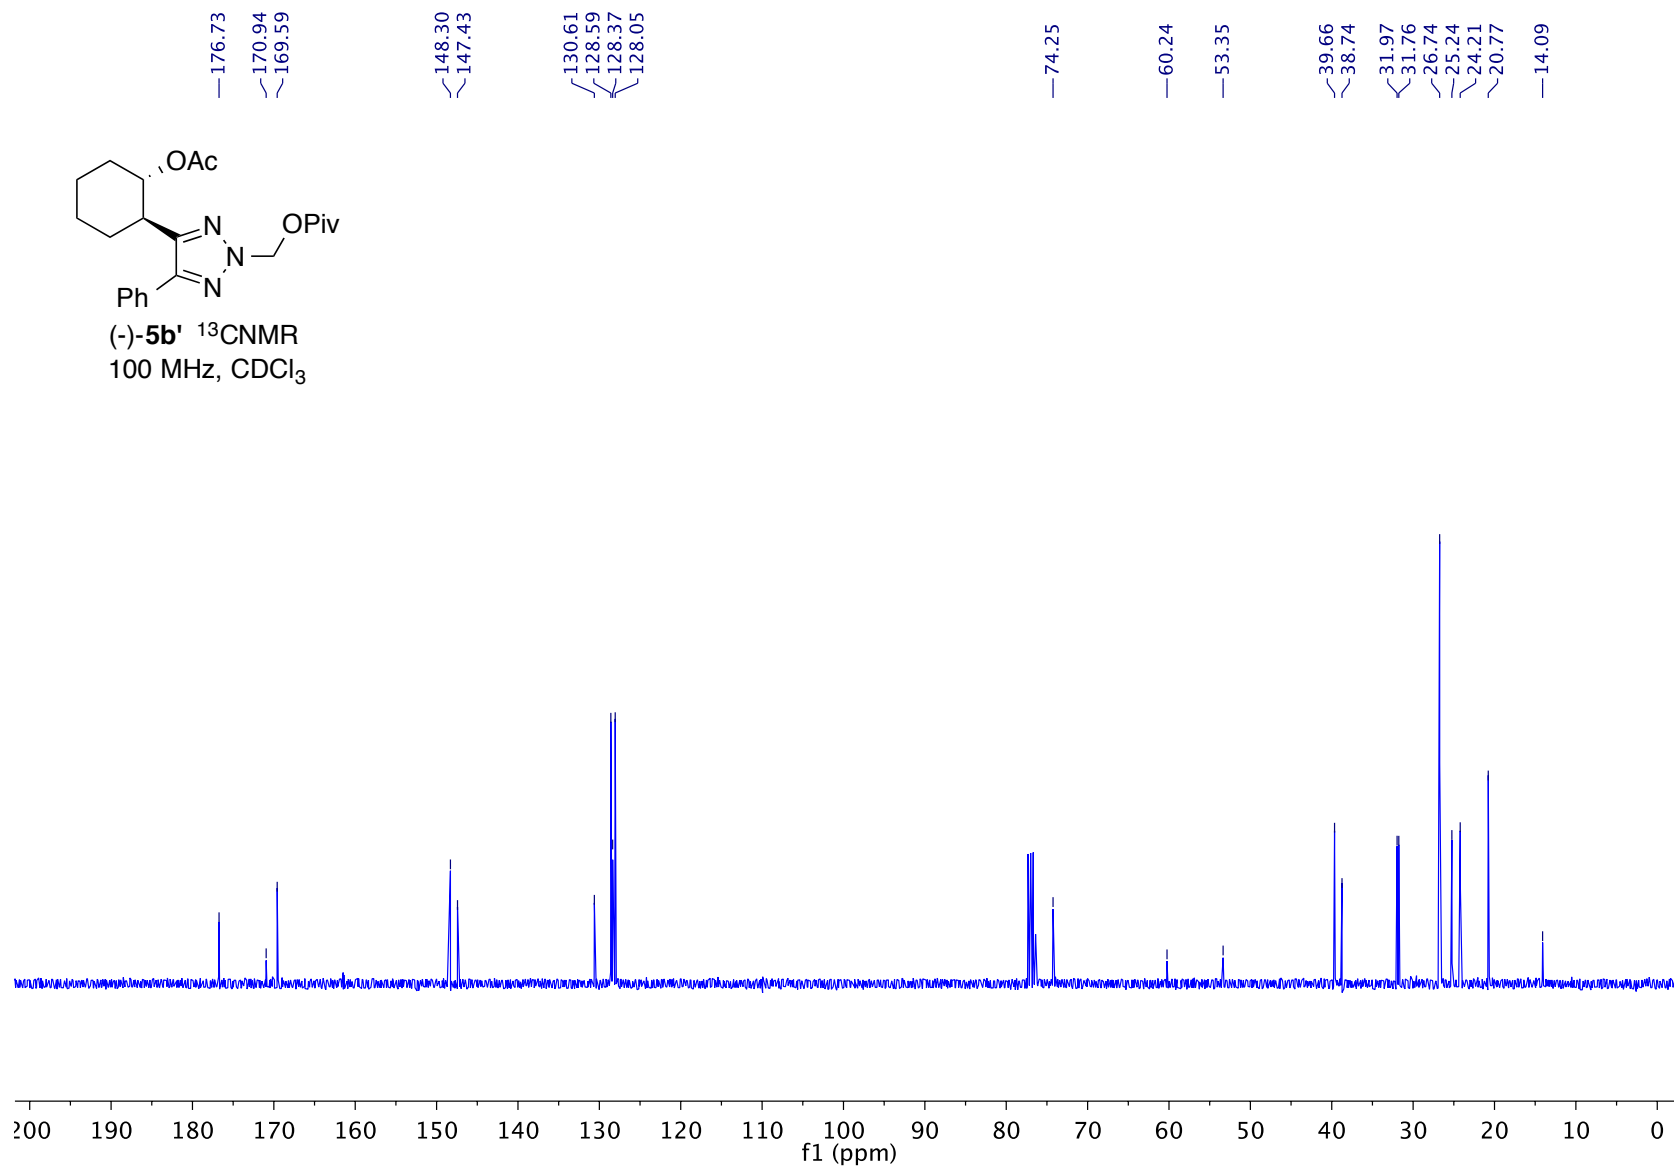

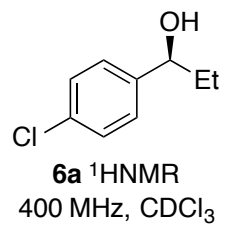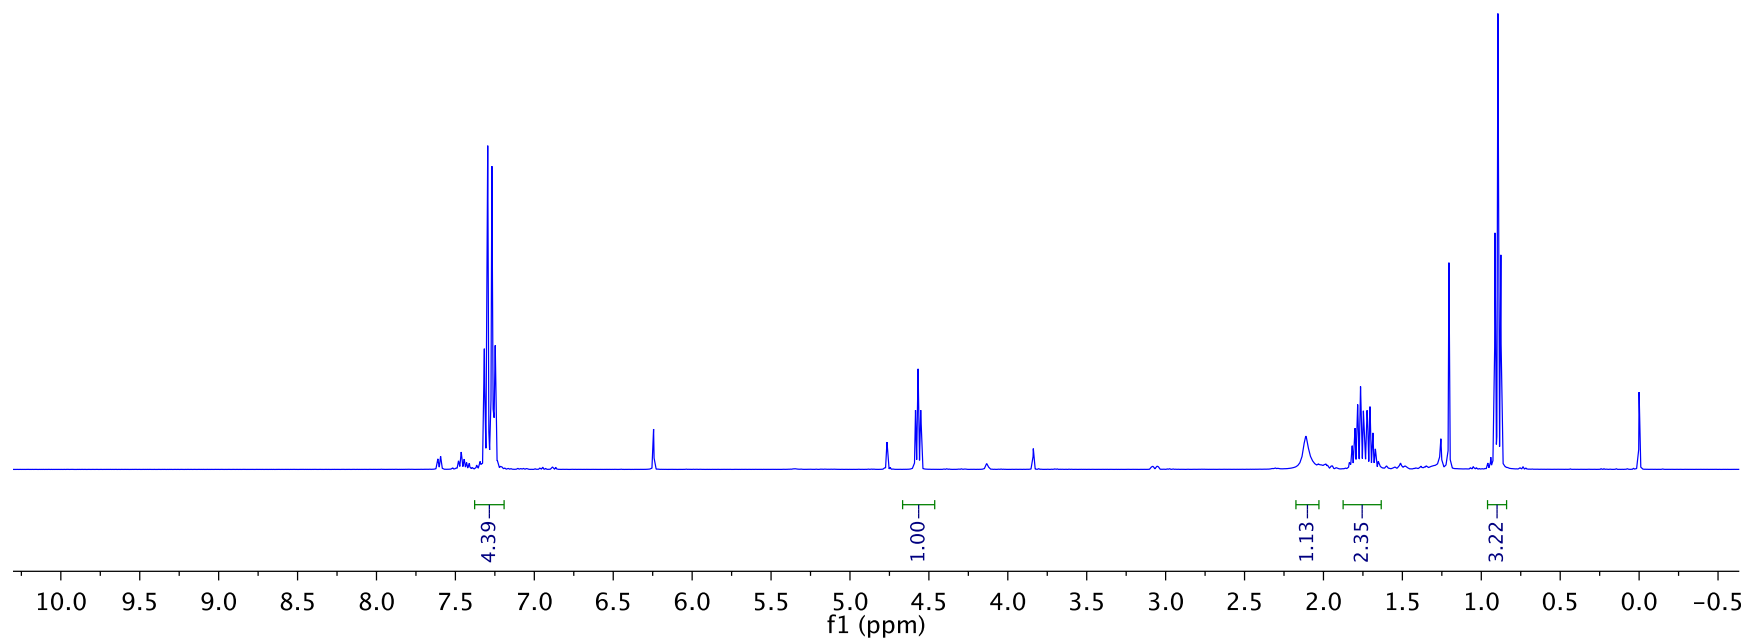

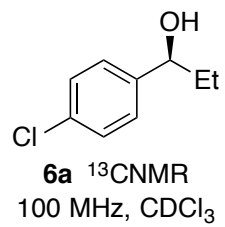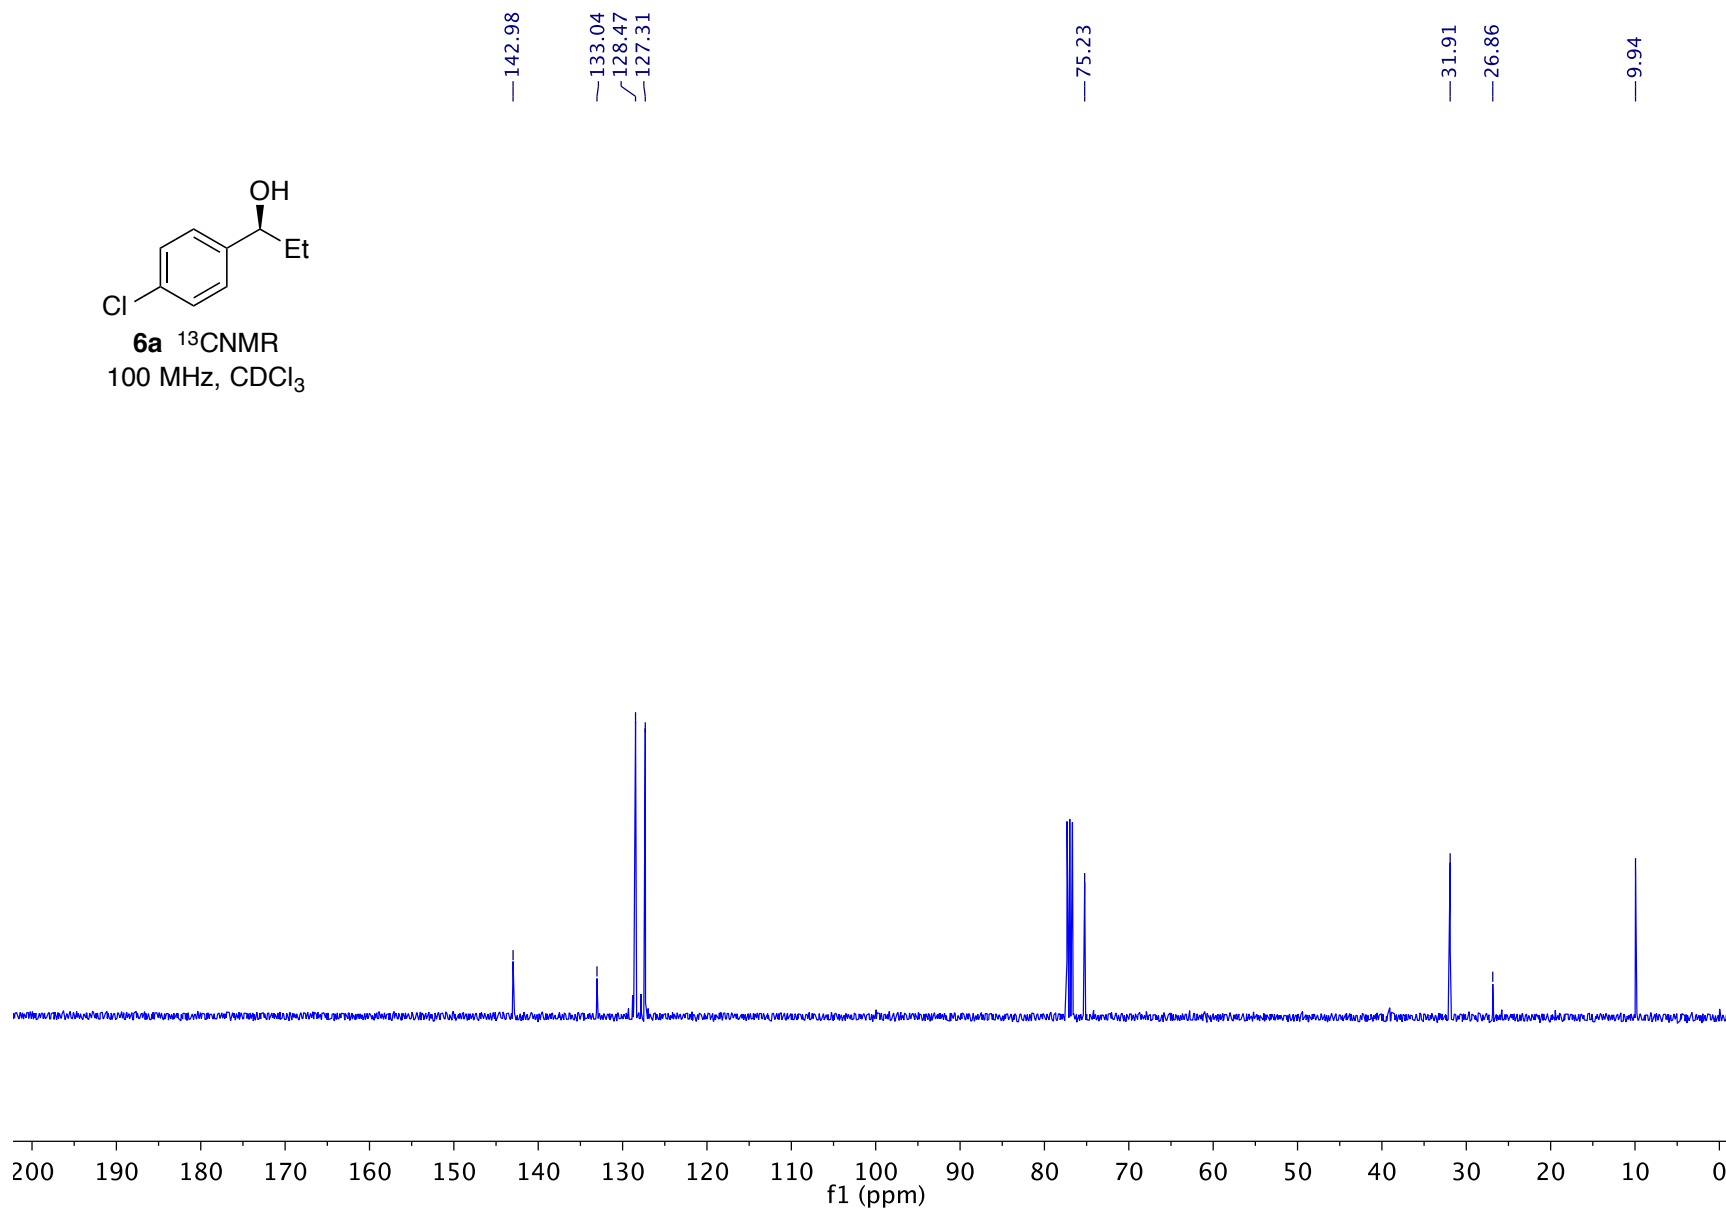



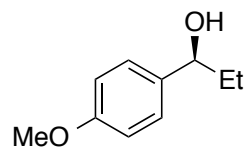

**6b**  $^1\text{H}$ NMR  
400 MHz,  $\text{CDCl}_3$

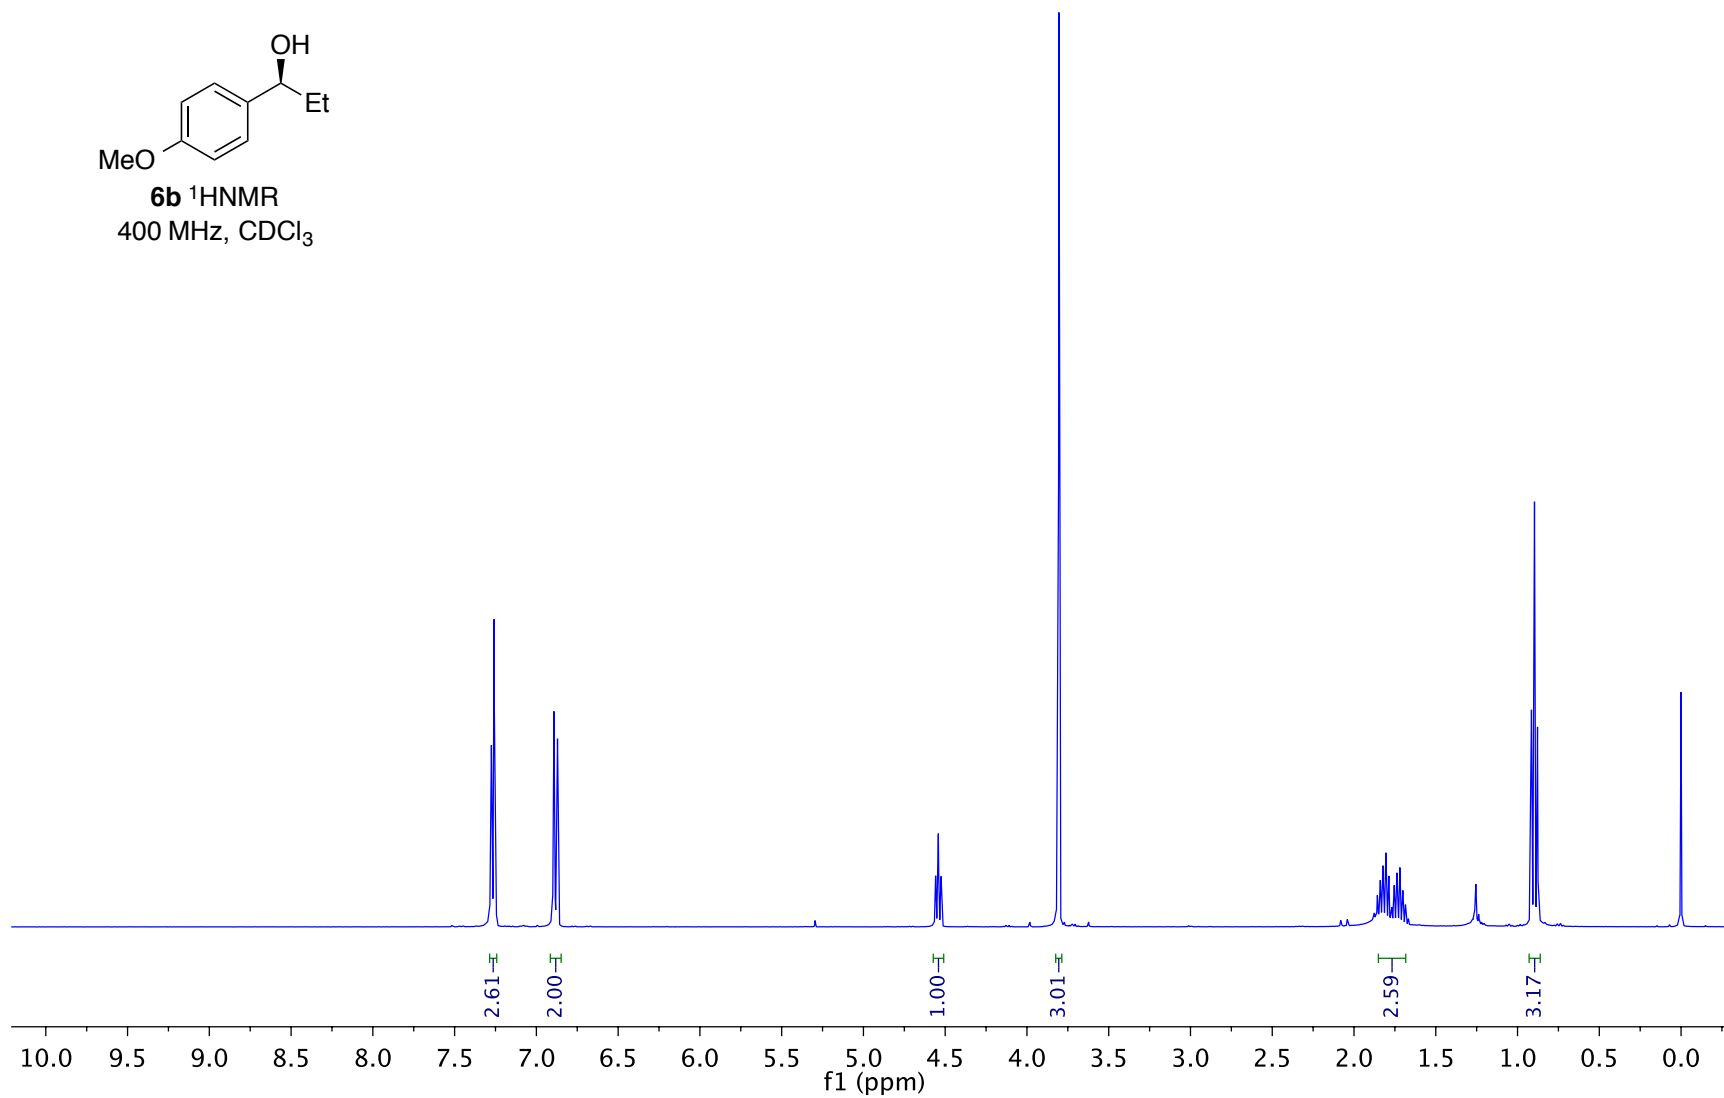

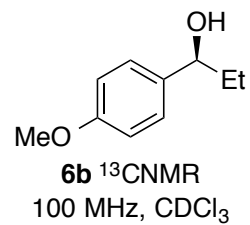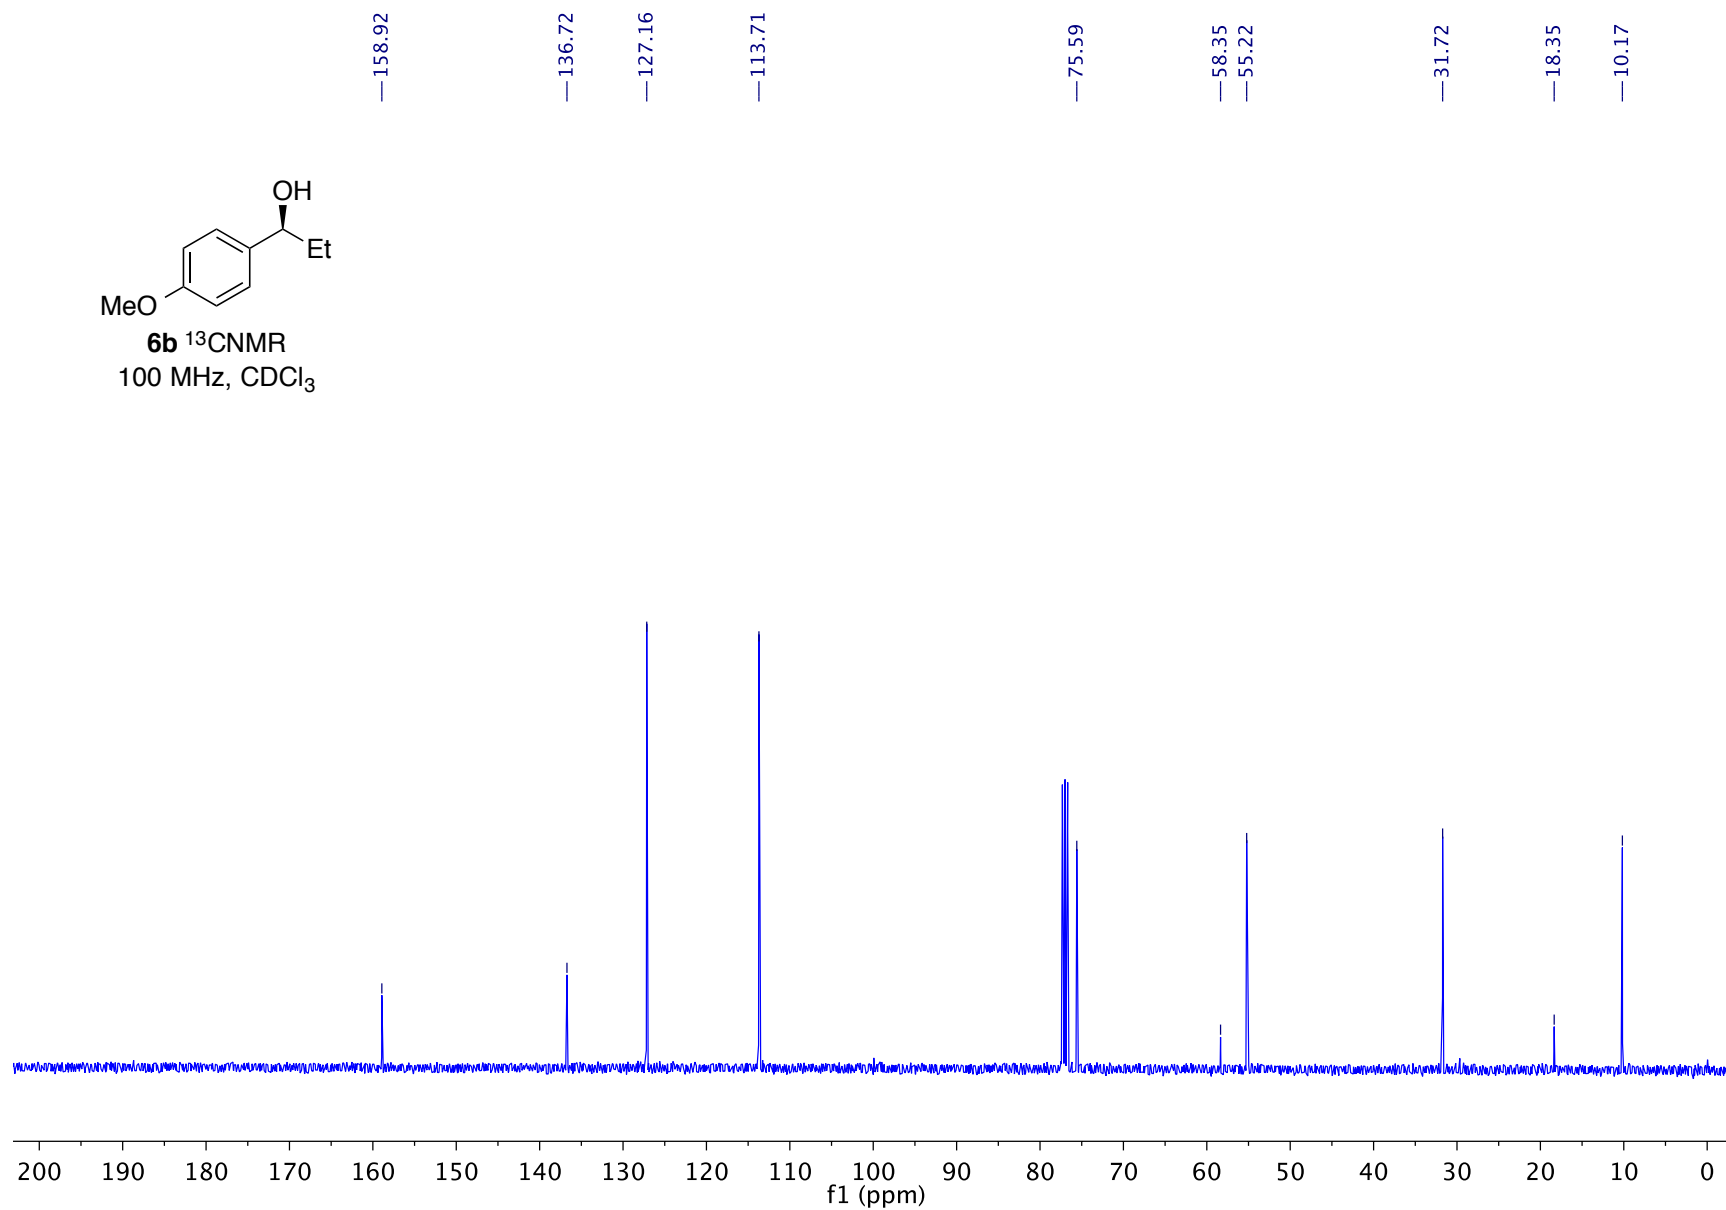

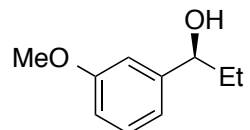

**6c**  $^1\text{H}$ NMR  
400 MHz,  $\text{CDCl}_3$

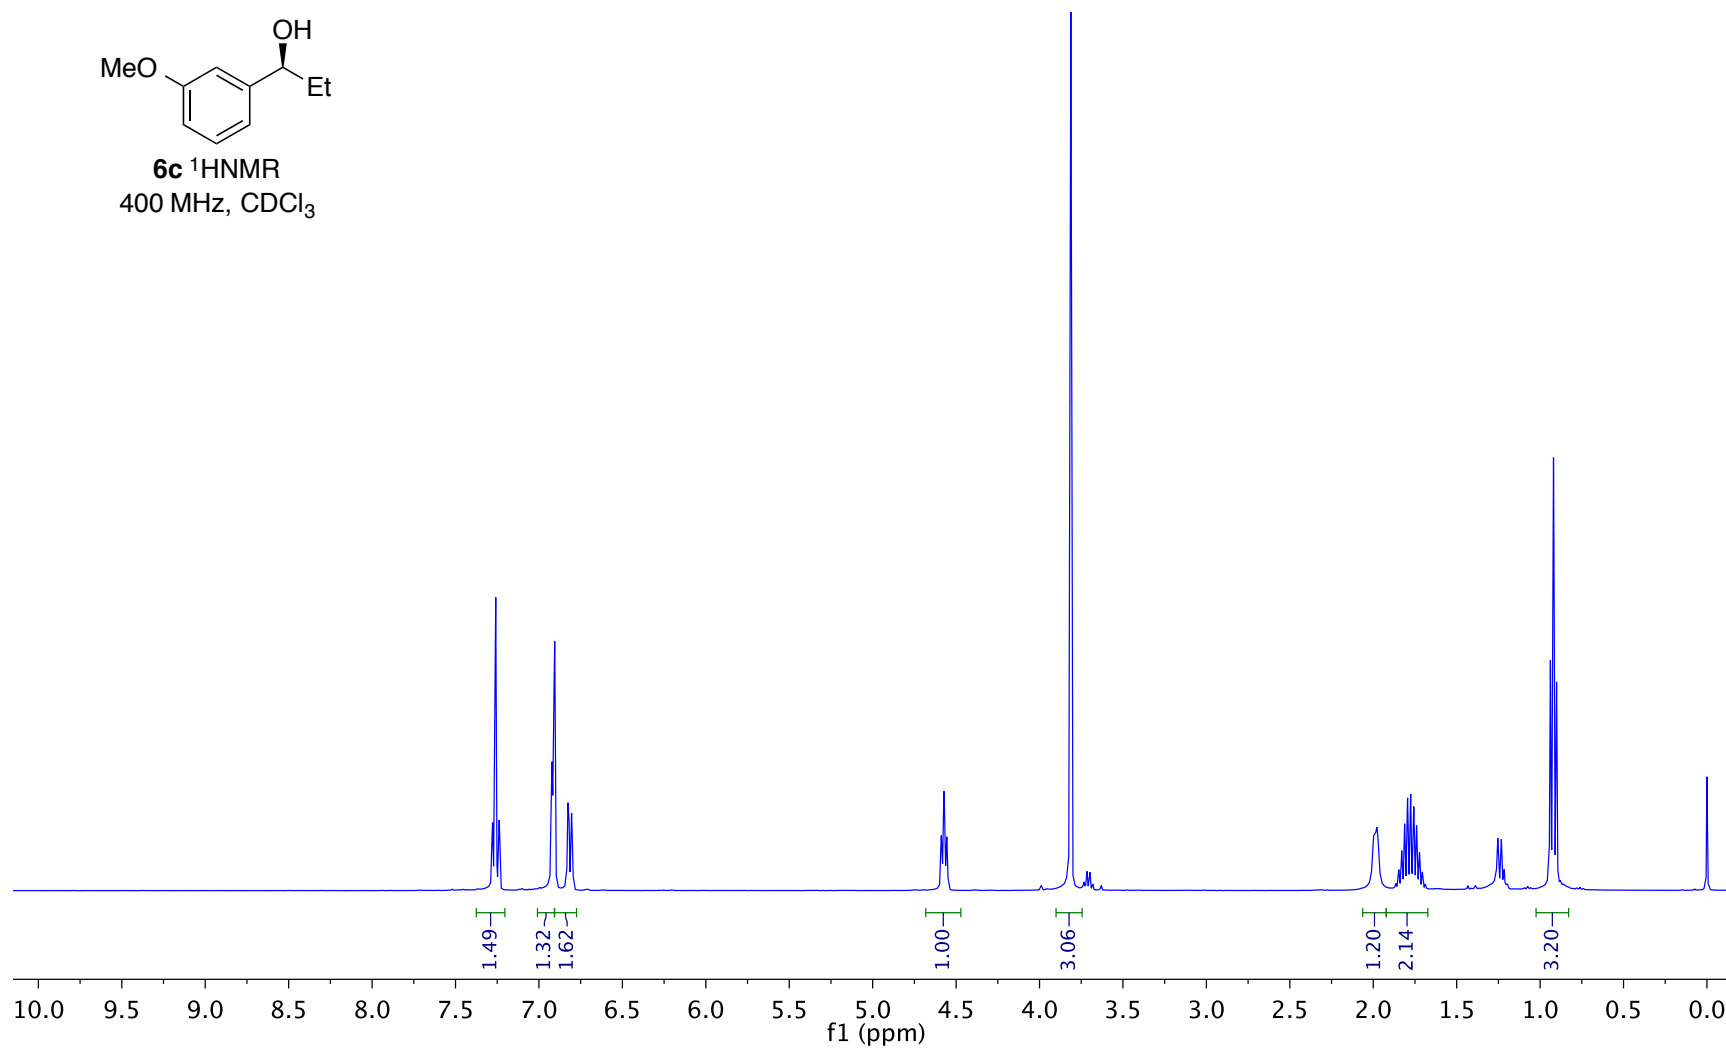

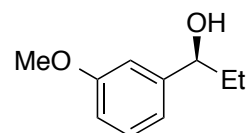

**6c**  $^{13}\text{C}$ NMR  
100 MHz,  $\text{CDCl}_3$

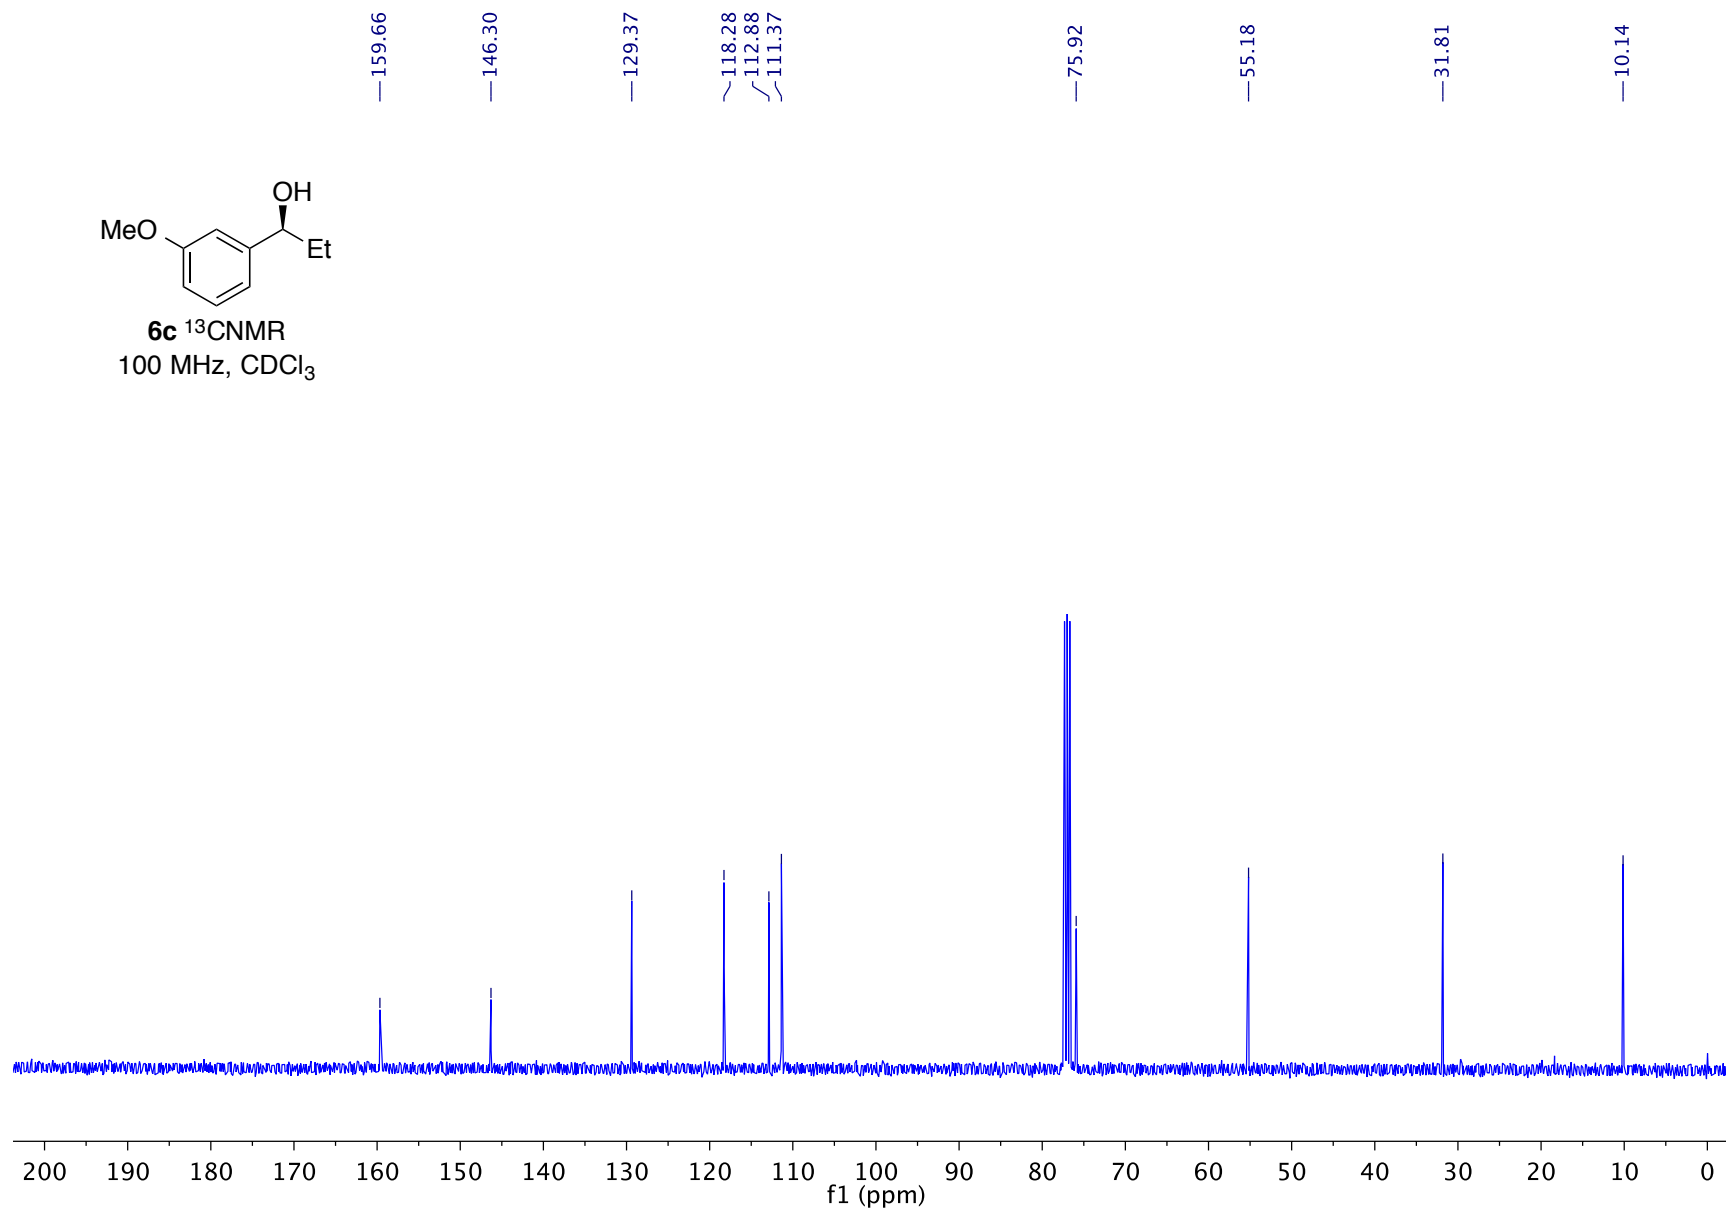

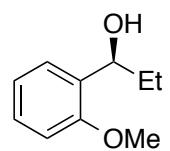

**6d**  $^1\text{H}$ NMR  
400 MHz,  $\text{CDCl}_3$

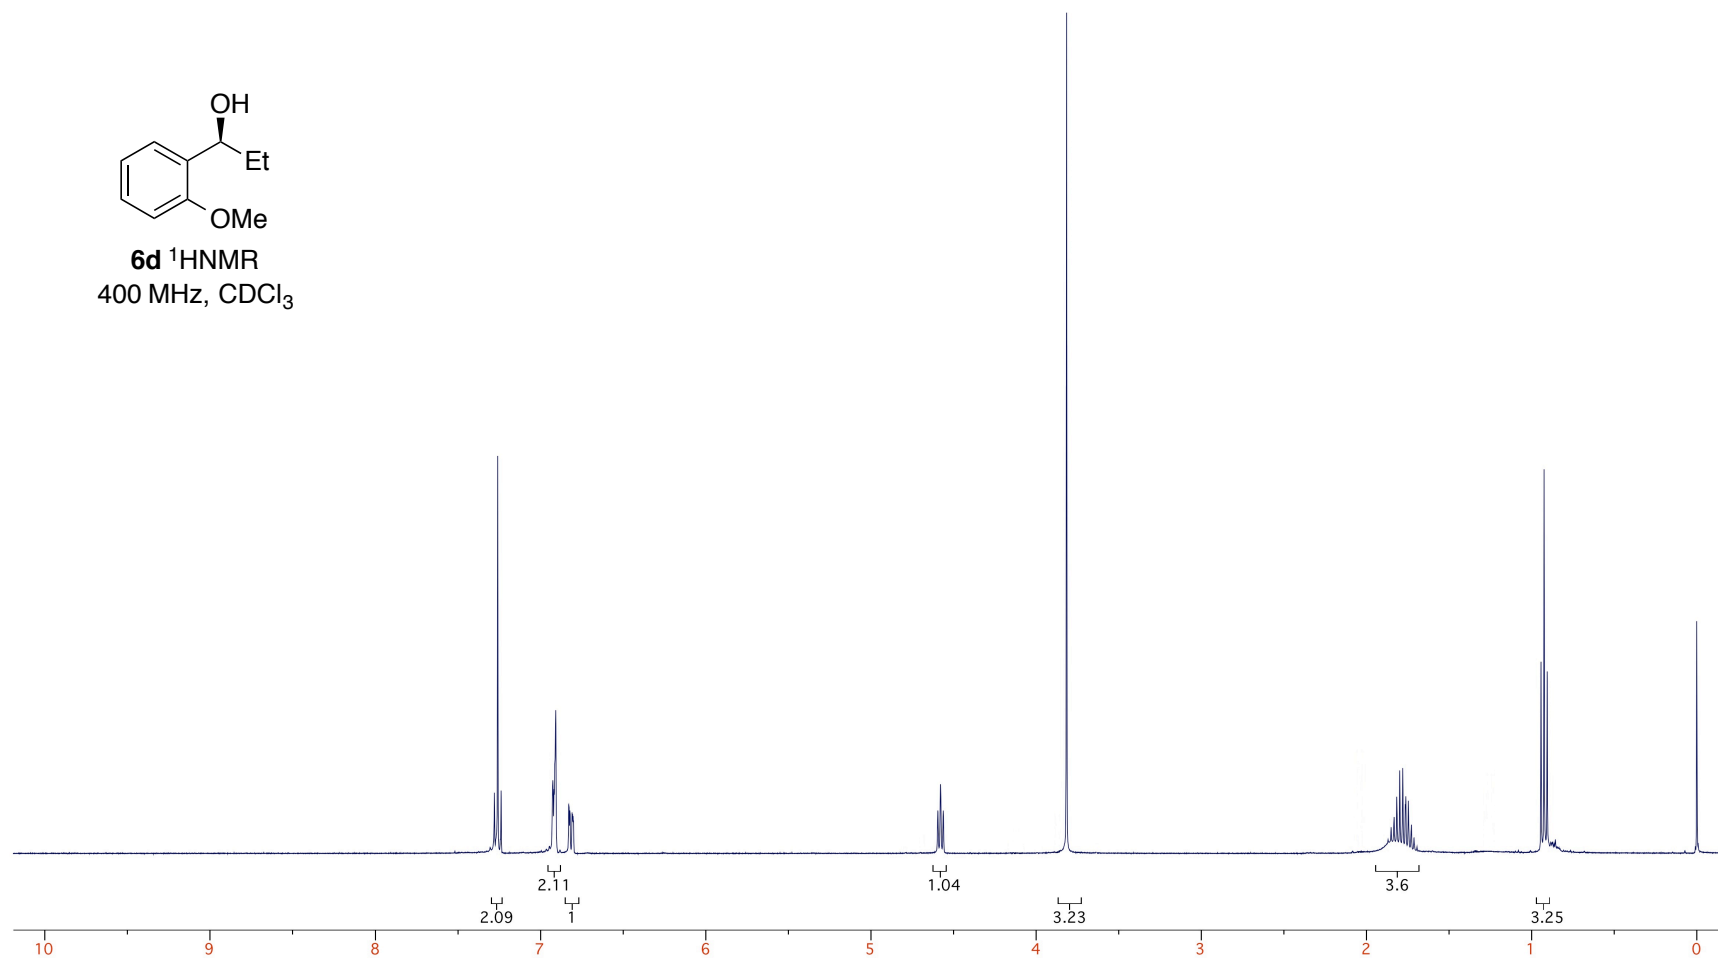

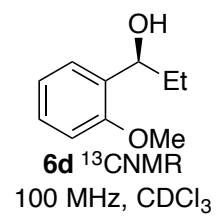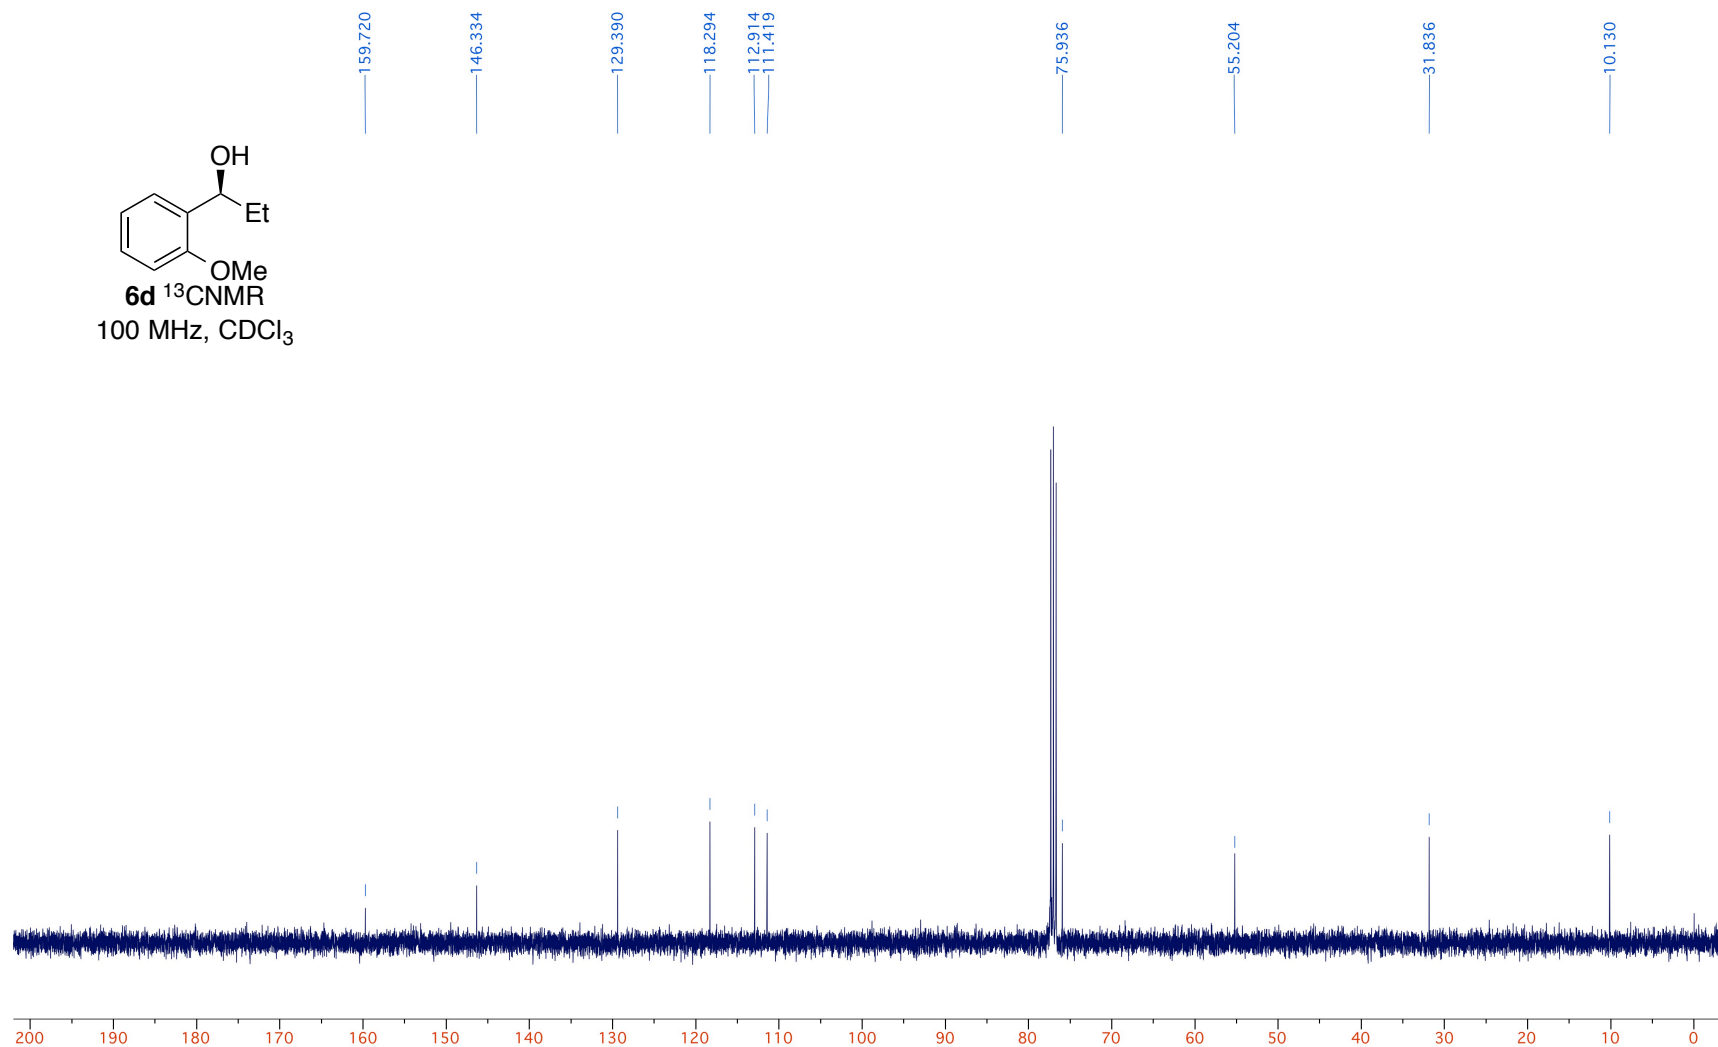

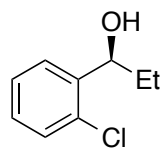

**6e**,  $^1\text{H}$ NMR  
400 MHz,  $\text{CDCl}_3$

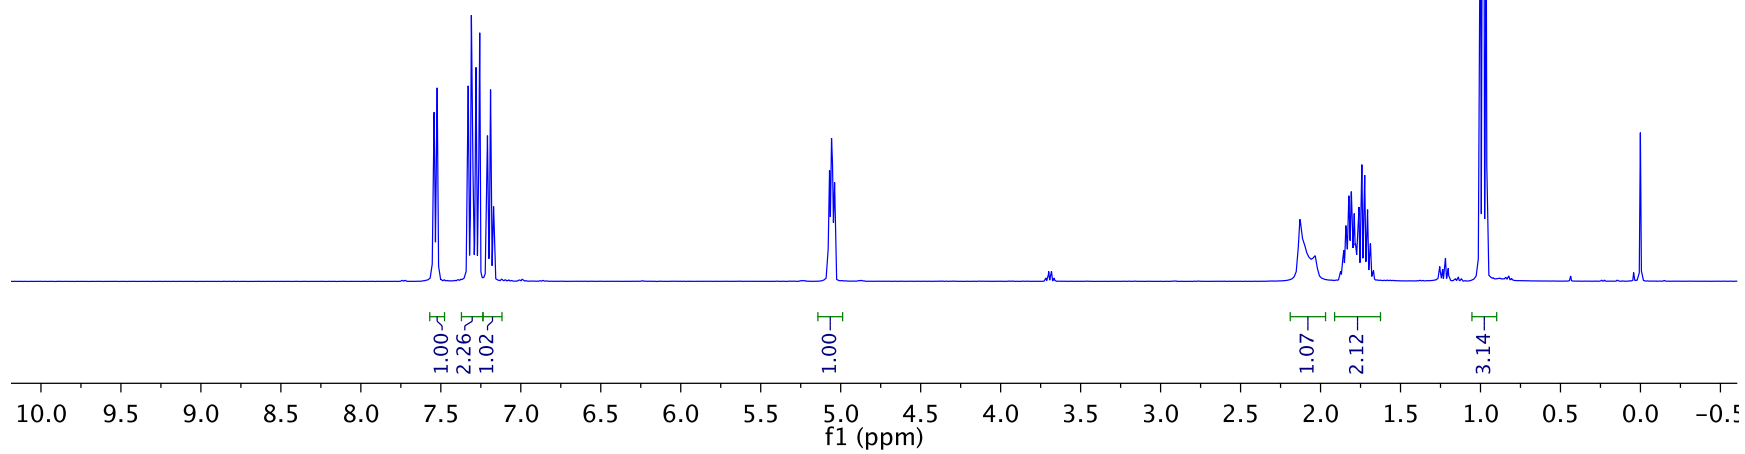

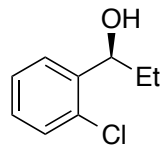

**6e**,  $^{13}\text{C}$ NMR  
100 MHz,  $\text{CDCl}_3$

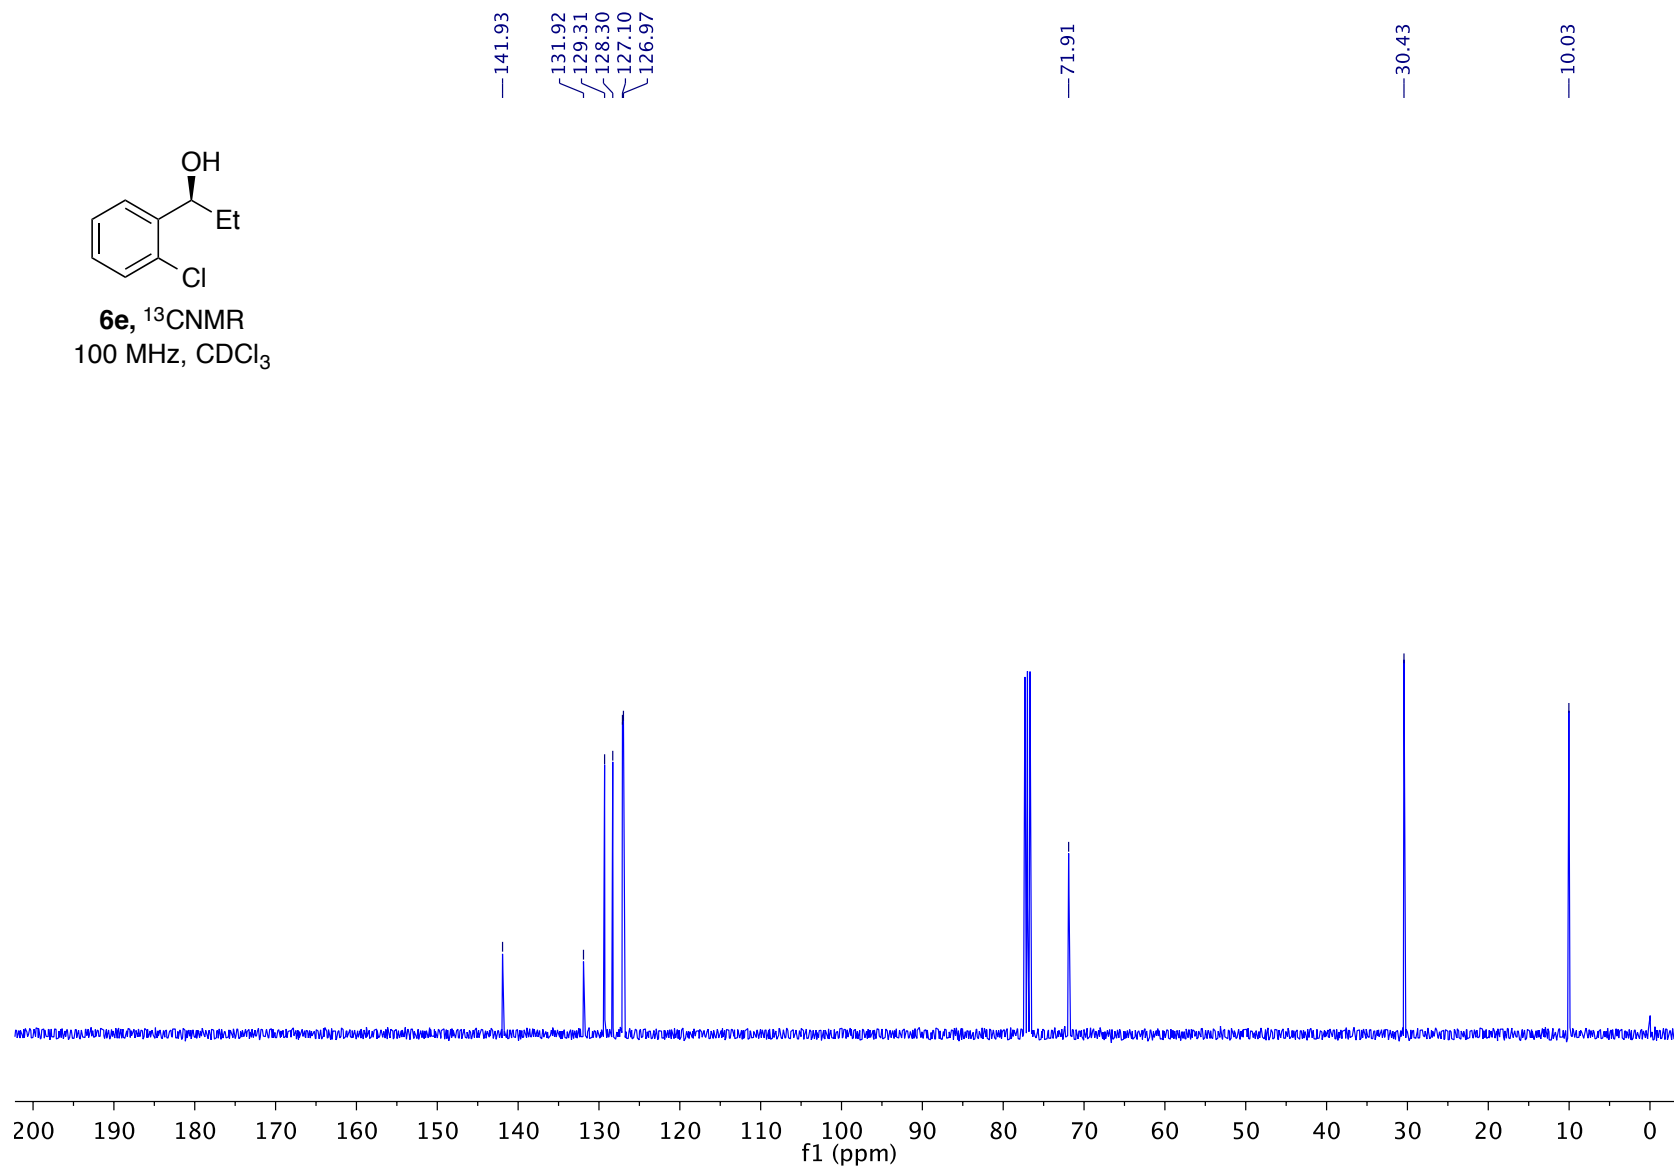

Supplement: c5ob00479a1.pdf [file c5ob00479a1.pdf]
